# Supplementary material for: Molecular signature of an ancient organizer regulated by Wnt/β-catenin signalling during primary body axis patterning in Hydra
Source: PubMed Central journal article supplement (PMC6879750; doi:10.1038/s42003-019-0680-3), 2019-11-26
Supplement: 42003_2019_680_MOESM1_ESM.pdf [file 42003_2019_680_MOESM1_ESM.pdf]

## Hybrid Transcriptome Generation Pipeline

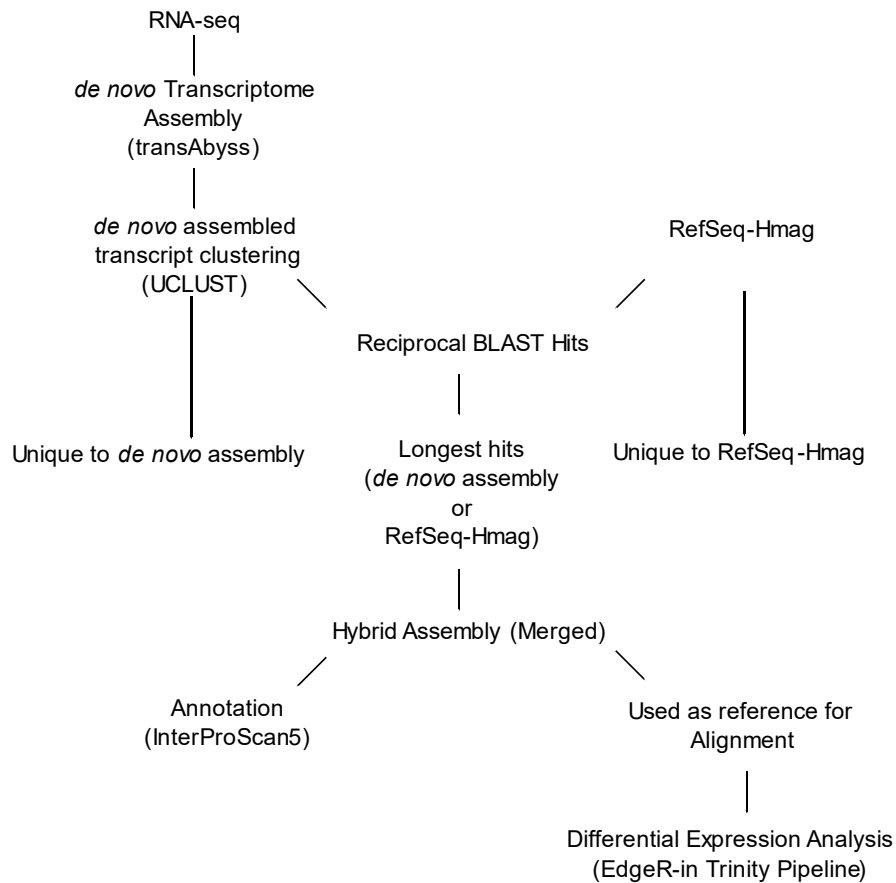

**Supplementary Figure 1: Generation of a hybrid transcriptome assembly.** After RNA sequencing raw reads from all experimental conditions were used to build the *de novo* assembly. A hybrid assembly was generated by merging missing sequences or longer transcripts from *Hydra magnipapillata* RefSeq.

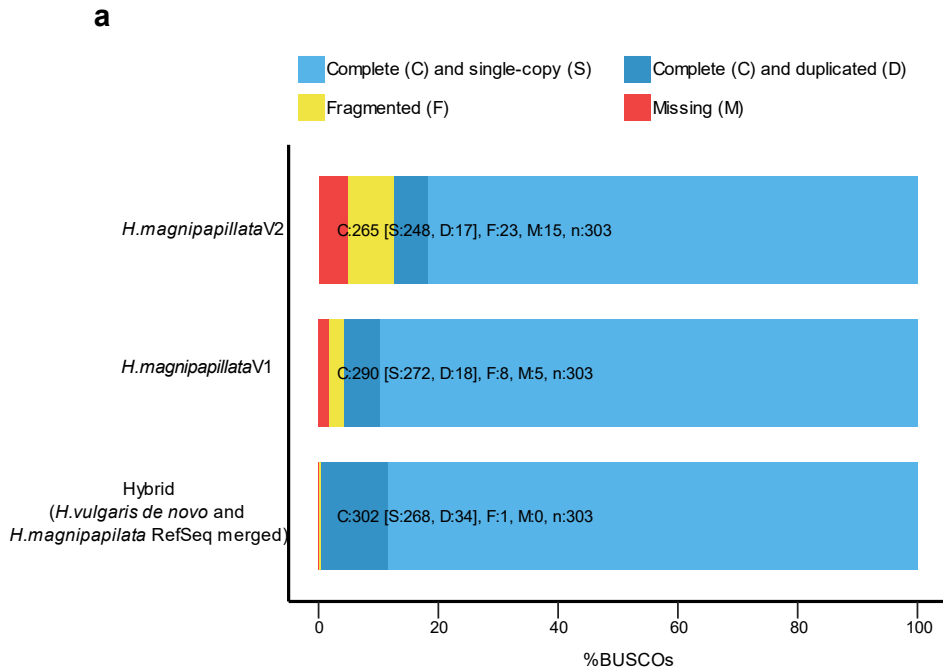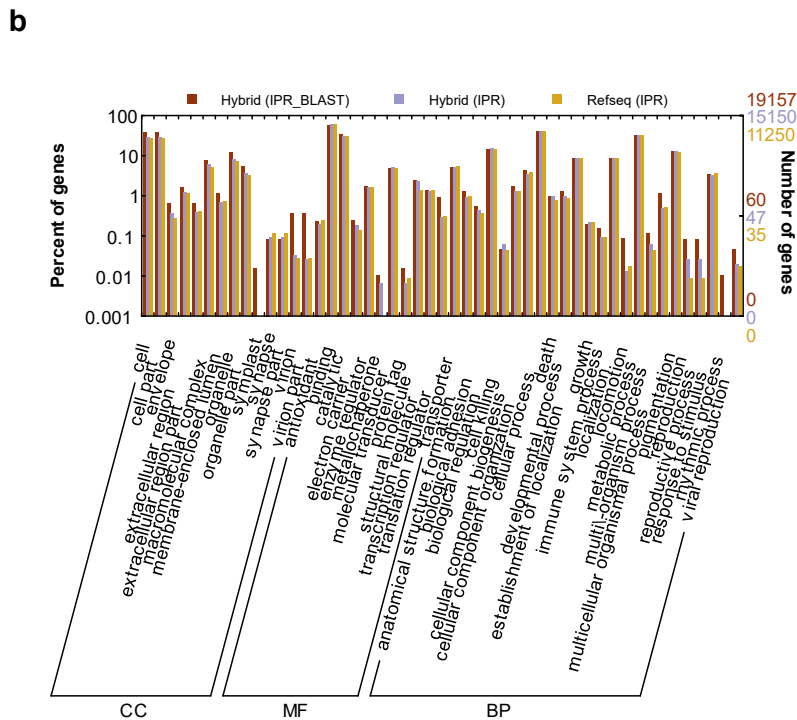

**Supplementary Figure 2: Quality assessment and annotation of hybrid assembly.** **a**, Evaluation of the quality of hybrid assembly and comparison with RefSeq data of *H. magnipapillata* and Hydra2.0 genome (*H. magnipapillata*). **b**, Comparison of different functional annotation methods on hybrid and RefSeq data. Barplot shows the coverage of gene ontology (GO) terms coverage. Hybrid assembly with InterProScan and BLAST based method gave best coverage.

## Domain architecture of downregulated TFs upon activation of Wnt signalling

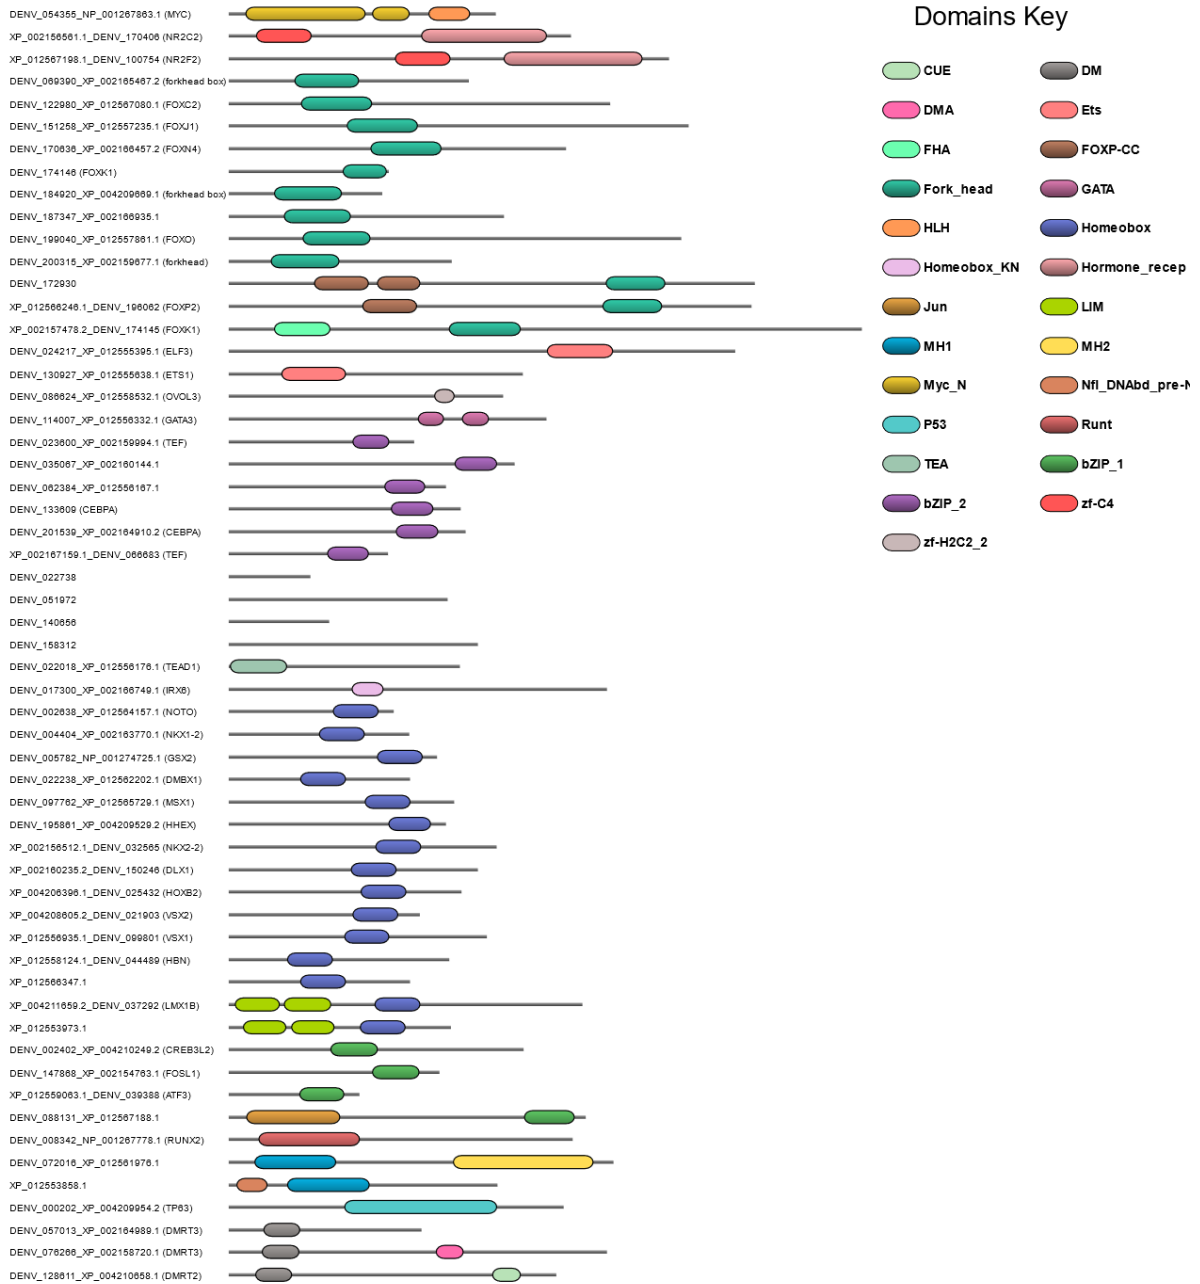

**Supplementary Figure 3: Domain organization of downregulated TFs upon activation of Wnt signalling by inhibition of GSK3- $\beta$ .** Colour coded key labels indicate the corresponding Pfam domain.

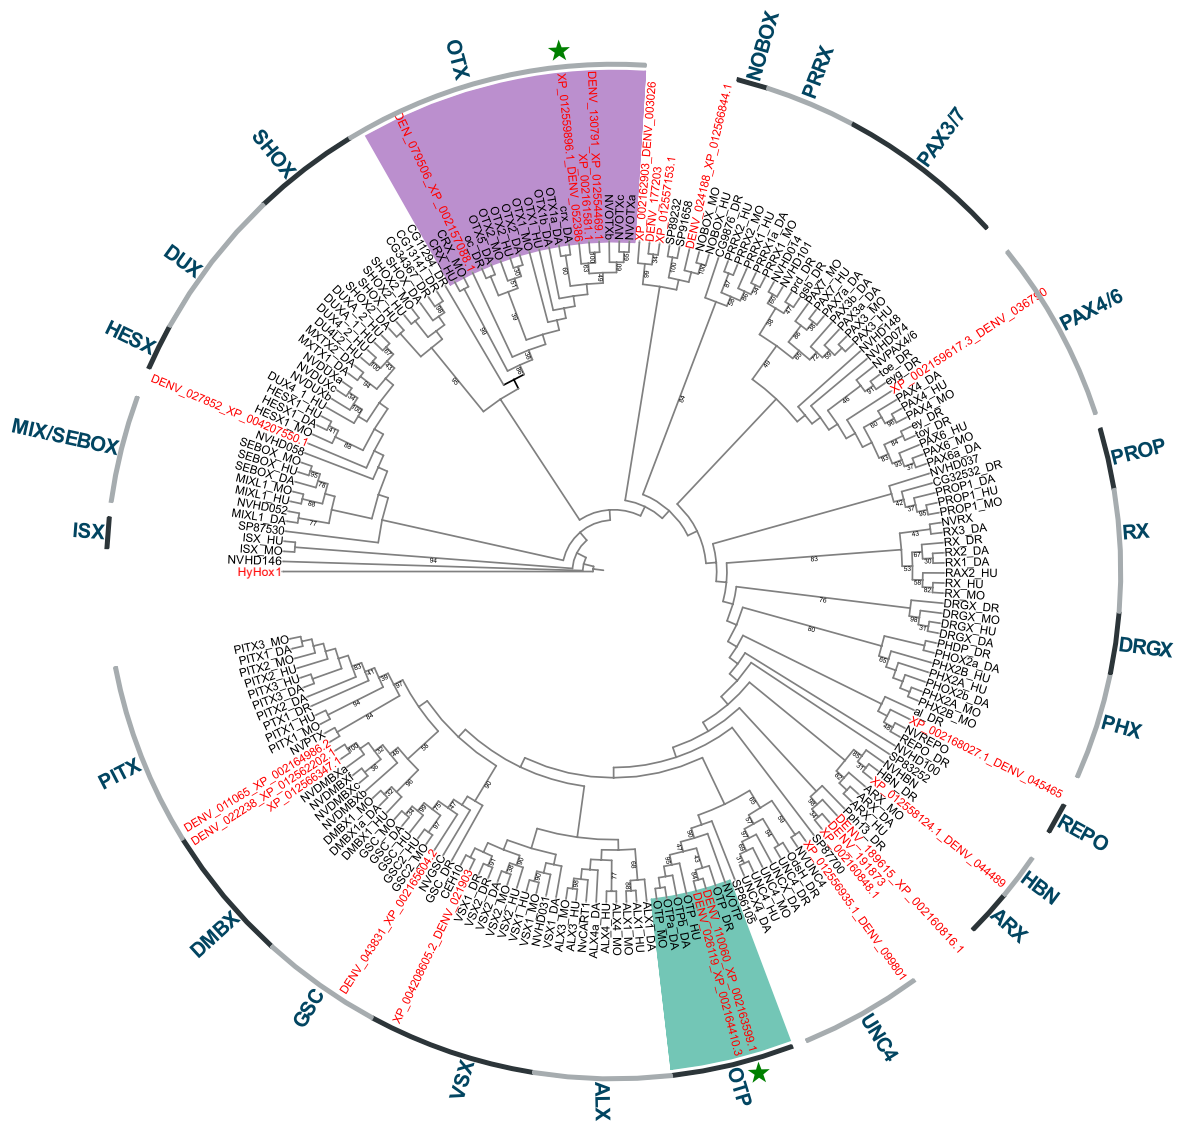

★ OTX and OTP homologues investigated in this study

**Supplementary Figure 4: Phylogenetic analysis of PRD class of homeodomain proteins.** Phylogenetic analysis of homeodomains from PRD members of selected animal phyla along with *Hydra* components was carried out by RAXML method. Here, the sequence alignments were performed using MUSCLE default parameters and after manually trimming they were used in analysis. Values on branches indicate the percentage confidence in branching point after 1000 bootstrap iterations. The sequence details are given in Supplementary Information. Sequences denoted with green star were used for further study in current work.

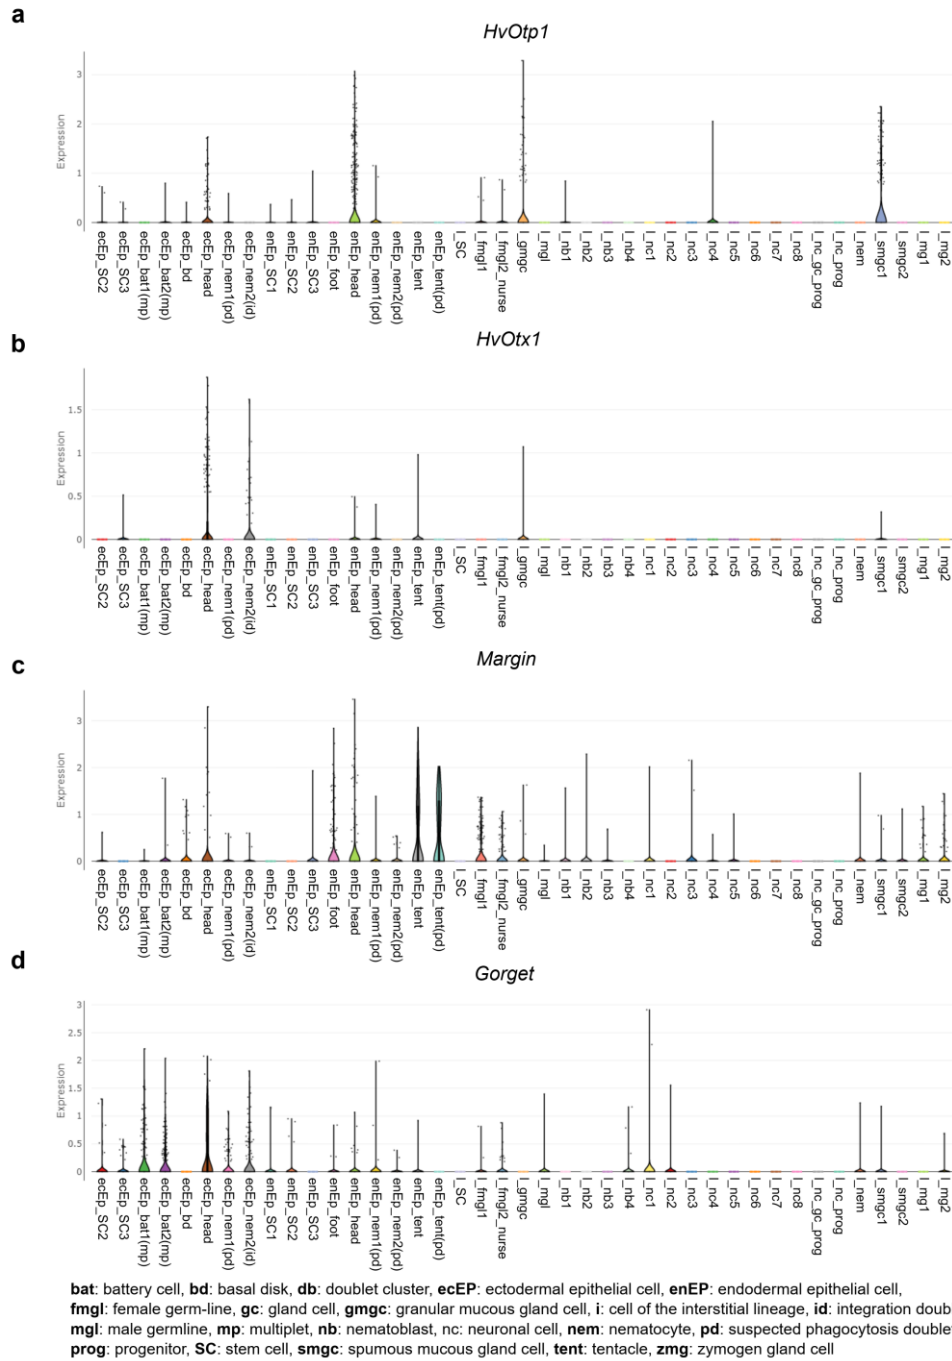

**Supplementary Figure 5: Expression of *HvOtp1*, *HvOtx1*, *Margin* and *Gorget* in different cell type cluster based on single cell transcriptome analysis.** The expression plots were used from the data available online ([https://portals.broadinstitute.org/single\\_cell/study/SCP260/stem-cell-differentiation-trajectories-in-hydra-resolved-at-single-cell-resolution](https://portals.broadinstitute.org/single_cell/study/SCP260/stem-cell-differentiation-trajectories-in-hydra-resolved-at-single-cell-resolution)). This data was generated by Siebert et. al., (2019)<sup>1</sup> for tracing the stem cell lineages in *Hydra* using single cell RNA-seq. **a**, Expression of *HvOtp1* in different cell-type clusters. **b**, Expression of *HvOtx1* in different cell-type clusters. **c**, Expression of *Margin* in different cell-type clusters. **d**, Expression of *Gorget* in different cell-type clusters. x-axis, names of the different cell-type clusters; y-axis, expression in the cells of different cell-type clusters.

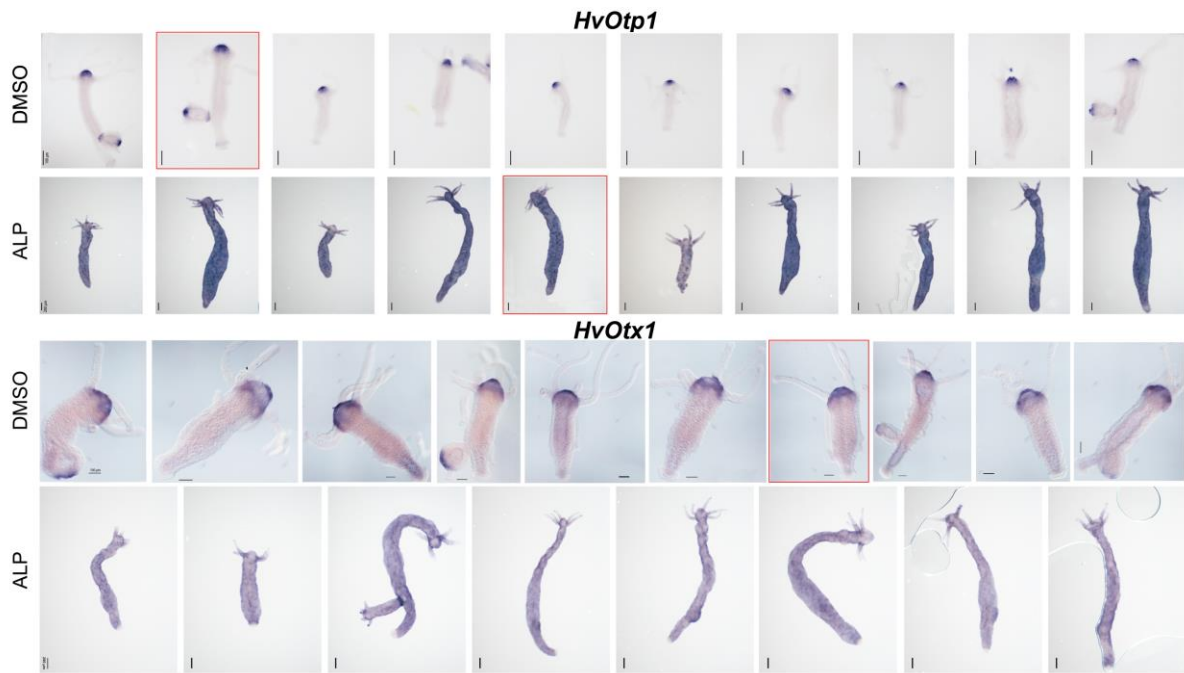

**Supplementary Figure 6: Expression pattern of *HvOtp1* and *HvOtx1* upon activation of Wnt signalling.** Family pictures of expression pattern of *HvOtp1* and *HvOtx1* by *in situ* hybridization after treatment with Alsterpaullone with respective controls. DMSO, vehicle control; ALP, 5  $\mu$ M Alsterpaullone. The images with Red border line were used as representative images in Figure 2d.

**a**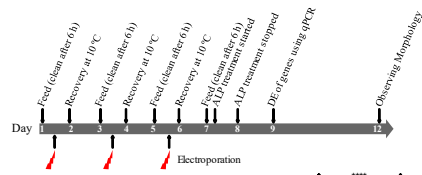**b**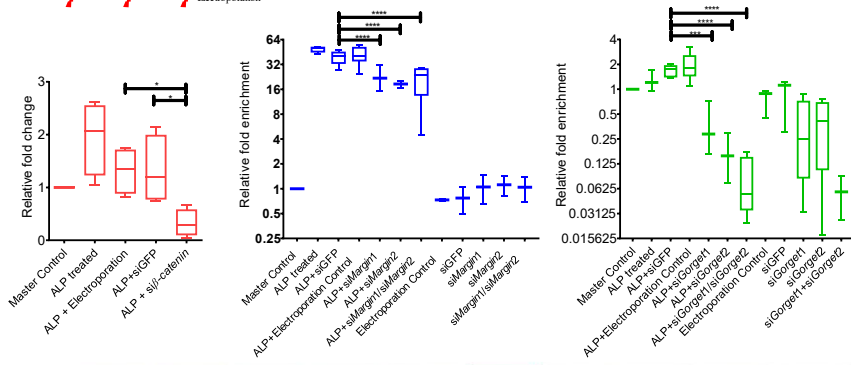**c**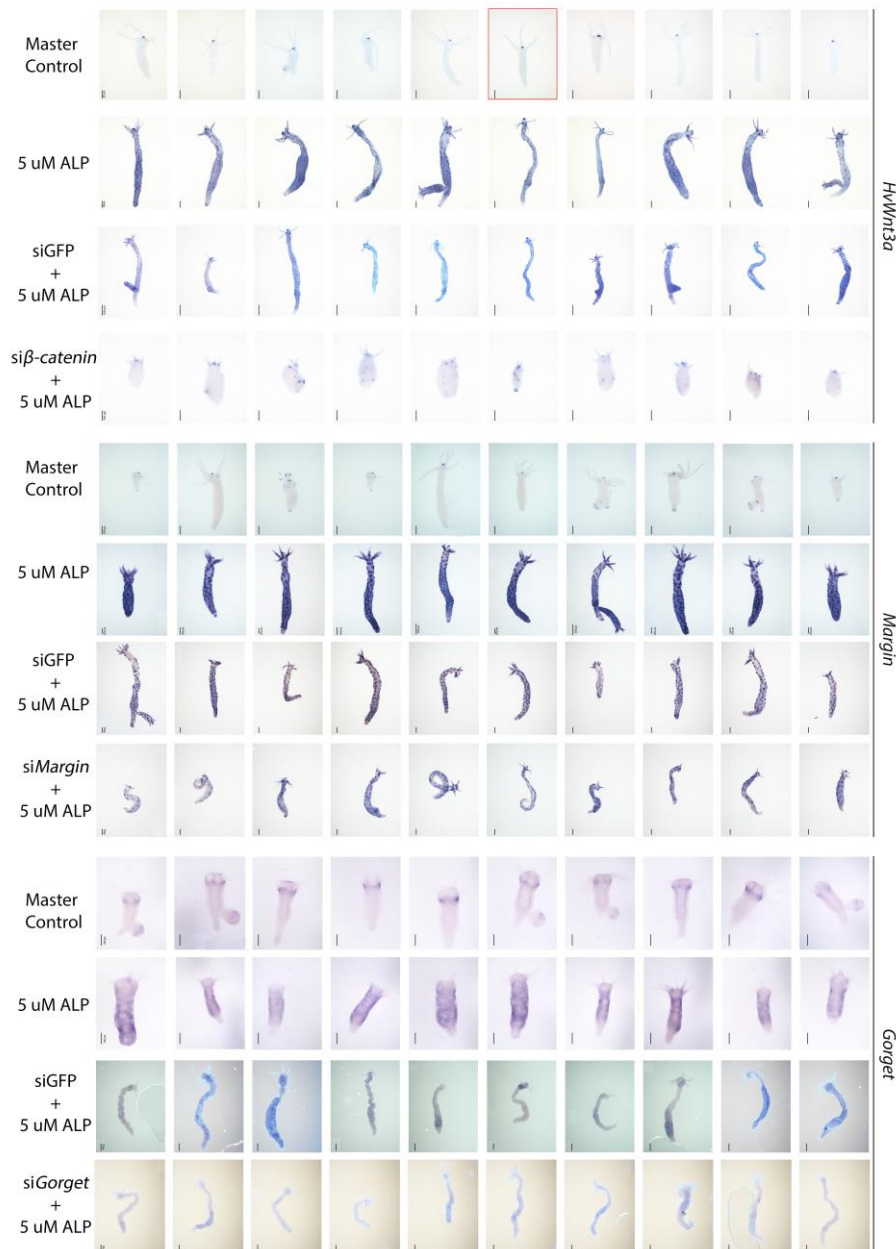

**Supplementary Figure 7: Knockdown of  $\beta$ -catenin, Margin and Gorget.** Experimental design of siRNA mediated knockdown of  $\beta$ -catenin, *HvRx1* and *Gorget* followed by the activation of Wnt signalling. **b**, Validation of  $\beta$ -catenin, *HvRx1* and *Gorget* knockdown by qRT-PCR; \*\*\*,  $p < 0.001$ ; \*\*,  $p < 0.01$ ; \*,  $p < 0.05$ . **c**, Family pictures of expression scored by *in situ* hybridization upon knockdown of  $\beta$ -catenin, *Margin* and *Gorget* with controls. Image with red line border was used as the representative image in Figure 1c.

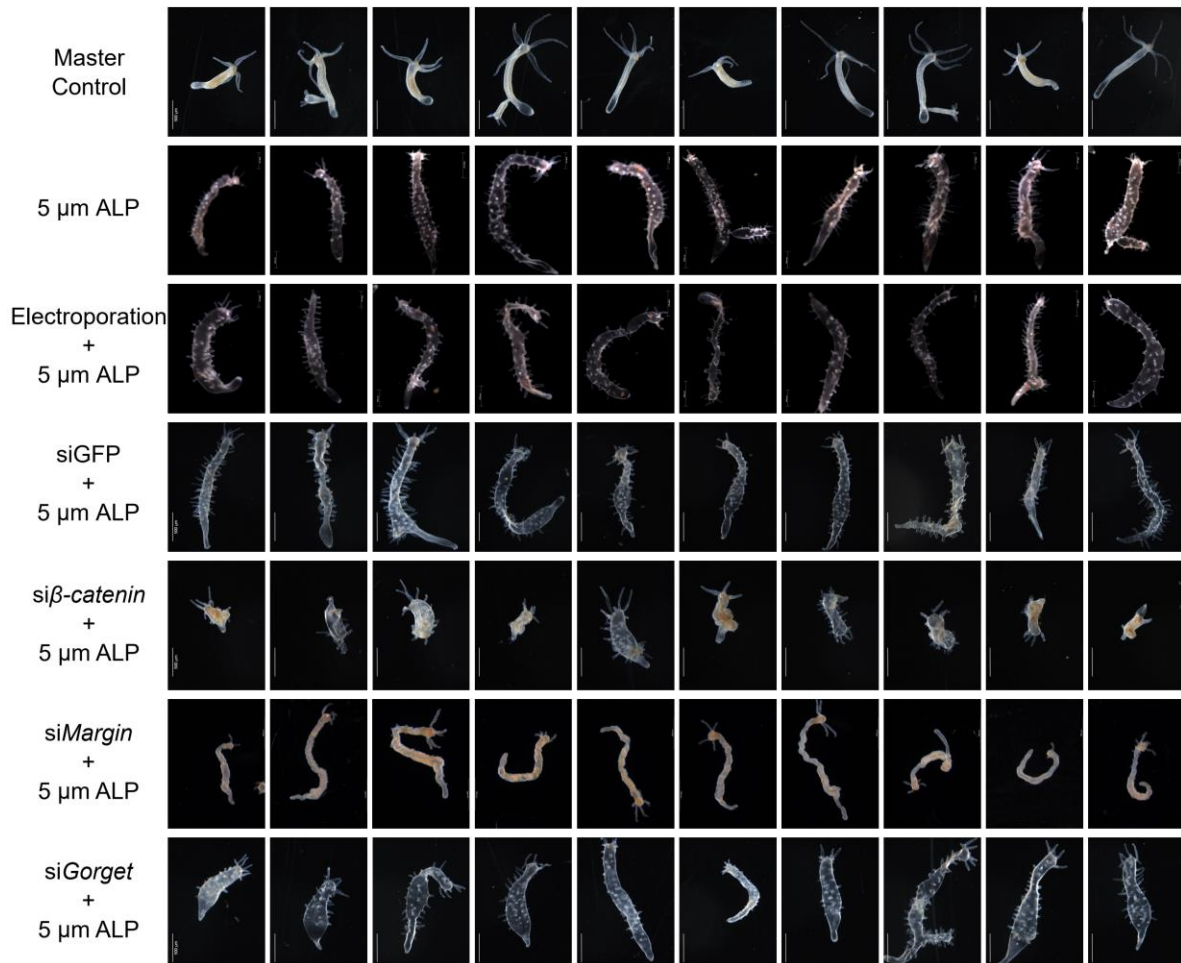

**Supplementary Figure 8: Morphology of *Hydra* polyps following Knockdown of  $\beta$ -catenin, Margin and Gorget.** Pictures of morphological changes followed by knockdown of  $\beta$ -catenin, *Margin* and *Gorget* in the background of Alsterpaullone treatment.



**a**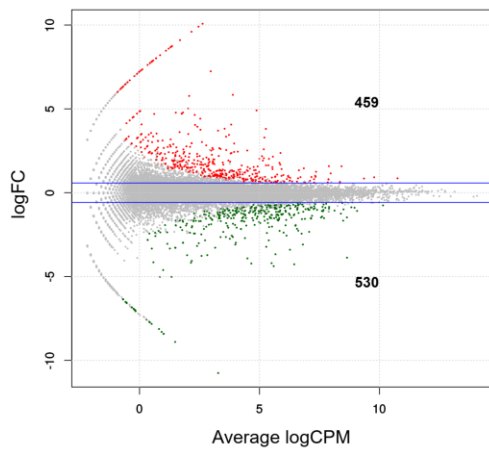**b**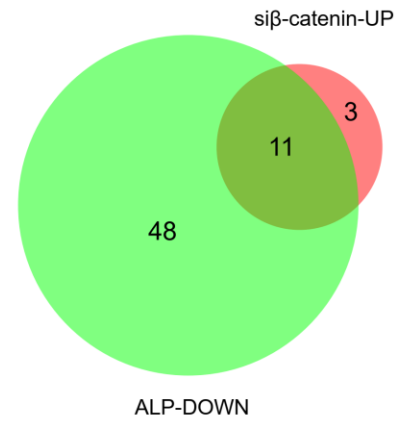

**Supplementary Figure 9: Differential gene expression analysis upon  $\beta$ -catenin knockdown.** **a**, Smear plot showing the differentially expressed genes upon knockdown of  $\beta$ -catenin followed by activation of Wnt signalling. Red and Green colour dots denote significantly up and down regulated genes respectively. **b**, Venn diagram showing the overlap of TFs downregulated by activation of Wnt signalling and TFs upregulated by  $\beta$ -catenin knockdown. ALP-DOWN, downregulated TFs upon Alsterpaullone treatment; si $\beta$ -catenin-UP, upregulated TFs after  $\beta$ -catenin knockdown.

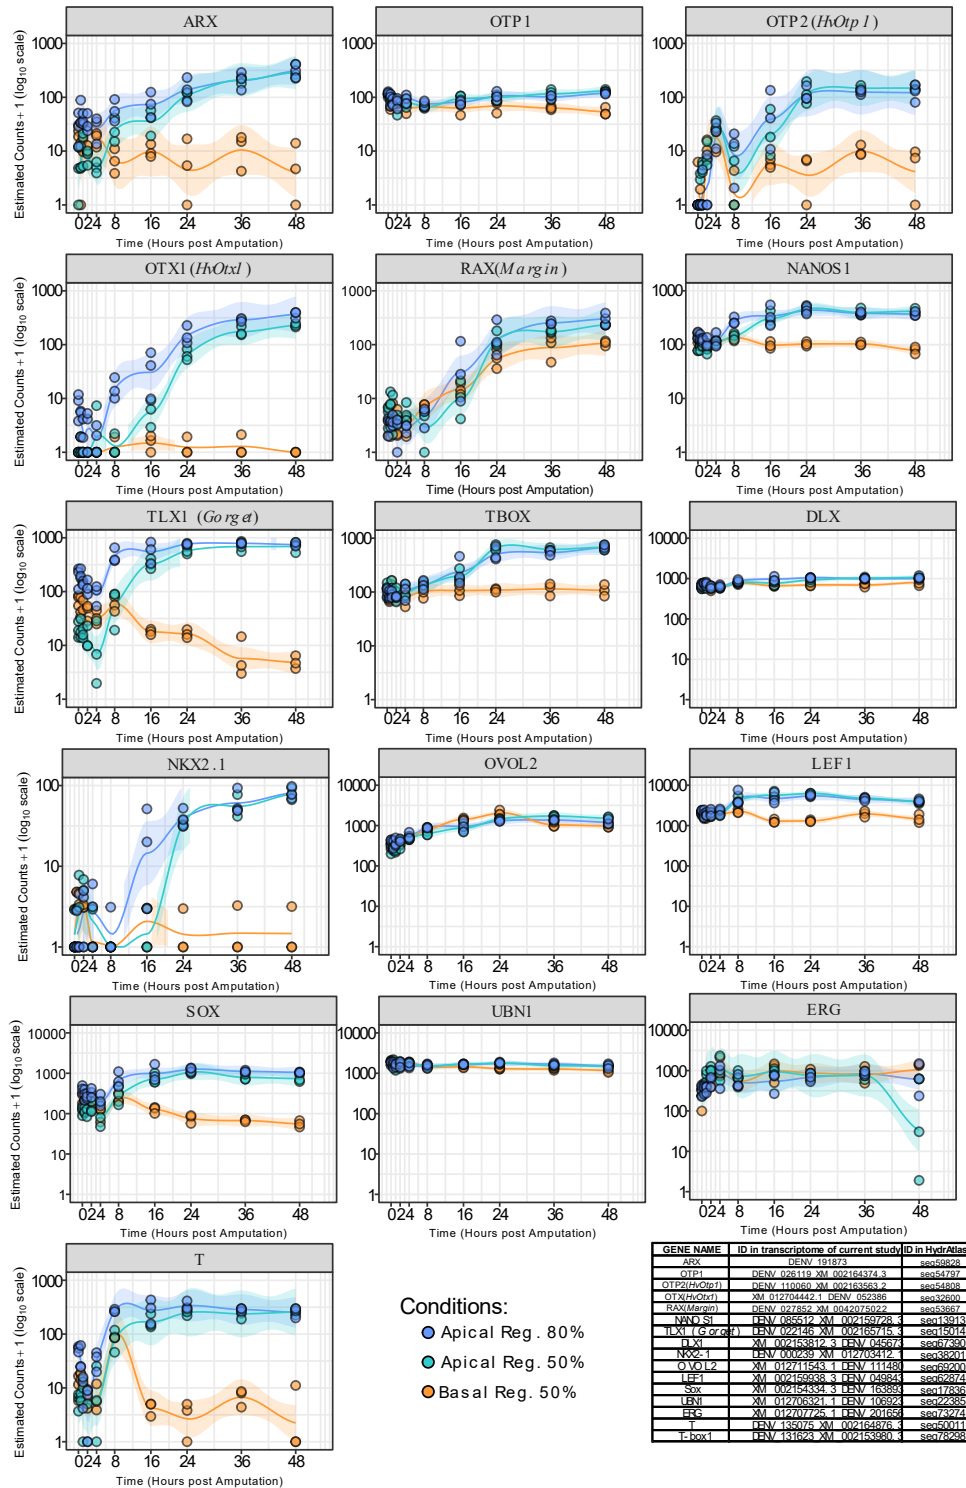

**Supplementary Figure 10: Expression dynamics of Wnt/ $\beta$ -catenin regulated TFs identified in this study during regeneration of Hydra.** Expression plots for selected genes were extracted from HydrATLAS server (<https://hydratlas.unige.ch/>)<sup>2,3</sup>. Plots depict the estimated counts (y-axis) for transcripts during different time points of regeneration (x-axis). The table in the bottom right corner includes details of gene names, identification numbers (IDs) of our hybrid transcriptome assembly and corresponding IDs in HydrATLAS.

**Information regarding the versions of programs and command lines used in the *de novo* transcriptome assembly, functional annotation and differential expression analysis.**

**1) Data processing by FASTX toolkit (version 36.06)**

- I) Trimming first 10 and last 2 bases using fastx\_trimmer  
\$fastx\_trimmer -Q 33 -f 10 -l 99 -i \$file -o \$file.trimmed
- II) Read correction using SEECER  
\$seecer Read1.fastq Read2.fastq

**2) Transcriptome assembly by abyss-pe (version 3.81) and transAbyss (version 1.4.8)**

- I) Assembly at different k-mers (35 to 88 in the interval of 3)

```
#!/bin/bash
for k in {35..88..3}
do
echo "Processing k-mer ***** : $k"
mkdir k$k
echo "Running k-mer: $k" >> kmer.log
abyss-pe -C k$k np=80 name=illumina k=$k lib='VC_rep1 VC_rep2 AP_rep1
AP_rep2' \
VC_rep1='/data/transcriptome/SO_2135/VC_control/rep1/SO_2135_Set_I_B_VC_R
1.fastq.trimmed_corrected.fa
/data/transcriptome/SO_2135/VC_control/rep1/SO_2135_Set_I_B_VC_R2.fastq.trim
med_corrected.fa' \
VC_rep2='/data/transcriptome/SO_2135/VC_control/rep2/SO_2135_Set_II_A_VC_R
1.fastq.trimmed_corrected.fa
/data/transcriptome/SO_2135/VC_control/rep2/SO_2135_Set_II_A_VC_R2.fastq.tri
mmed_corrected.fa' \
AP_rep1='/data/transcriptome/SO_2135/AP_treated/rep1/SO_2135_Set_I_B_AP_R
1.fastq.trimmed_corrected.fa
/data/transcriptome/SO_2135/AP_treated/rep1/SO_2135_Set_I_B_AP_R2.fastq.trim
med_corrected.fa' \
AP_rep2='/data/transcriptome/SO_2135/AP_treated/rep2/SO_2135_Set_II_B_AP_R
1.fastq.trimmed_corrected.fa
/data/transcriptome/SO_2135/AP_treated/rep2/SO_2135_Set_II_B_AP_R2.fastq.tri
mmed_corrected.fa'
done
```

- II) Filtering of the assemblies (FEM)

Transcriptome libraries:

- junction contigs and indel bubbles are extended

- short contigs and short islands are removed
- overlapping/redundant sequences are merged
- sequences shorter than read length are removed

```
for k in 35 38 41 44 47 50 53 56 59 62 65 68 73 78 83 88
do
    bash ../wrappers/abyss-ta-filter -n illumina -i illumina/trans-abyss-
v1.4.8/assembly/k$k -o illumina/trans-abyss-v1.4.8/filter/k$k -k $k
done
```

```
bash ../wrappers/abyss-rmdups-iterative -n illumina -i illumina/trans-abyss-
v1.4.8/filter/ -o illumina/trans-abyss-v1.4.8/merge/ -p 80
```

### 3) Prediction of ORFs from the transcripts

```
$perl /home/amol/trinityrnaseq_r2012-10-05/trinity-
plugins/transdecoder/transcripts_to_best_scoring_ORFs.pl -t traabyss_transcripts.fa
-m 50 --CPU 30
```

### 4) *De novo* transcript clustering

The UCLUST algorithm divides a set of sequences into clusters. The `cluster_fast` and `cluster_smallmem` commands are based on UCLUST. A cluster is defined by one sequence, known as the centroid or representative sequence. Every sequence in the cluster must have similarity above a given identity threshold with the centroid, as shown in the figure below.

```
./usearch7.0.1001_i86linux32 -cluster_fast
best_candidates.eclipsed_orfs_removed.pep -id 0.9 -centroids centroid.fasta -uc
clusters.uc -fastapairs fastapairs.txt -userout hits.m8 -userfields
query+target+id+alnlen+mism+opens+qlo+qhi+tlo+thi+evaluate+bits
```

### 5) Prediction of ORFs from the reference based transcripts

```
$perl /home/amol/trinityrnaseq_r2012-10-05/trinity-
plugins/transdecoder/transcripts_to_best_scoring_ORFs.pl -t
reference_transcripts.fa -m 50 --CPU 30
```

## 6) Merging *de novo* (*Hydra vulgaris* Ind-Pune) and RefSeq (*Hydra magnipapillata*) assemblies

```
#refseq source

ftp://ftp.ncbi.nlm.nih.gov/genomes/refseq/invertebrate/Hydra_vulgaris/latest_assembly_versions/GCF_000004095.1_Hydra_RP_1.0/

#make blast database

$makeblastdb -in ./blastdb/refseq_protein.fasta -dbtype prot -out ./blastdb/refseq_protein

$makeblastdb -in ./blastdb/denovo_pep.fasta -dbtype prot -out ./blastdb/denovo_pep

$makeblastdb -in ./blastdb/uniref90.fasta -dbtype prot -out ./blastdb/uniref90

#run BLASTP reciprocally

$blastp -num_threads 12 -query ./blastdb/denovo_pep.fasta -db ./blastdb/refseq_protein -out ./RBH/denovo_vs_refseq -evaluate 0.01 -outfmt 7 -max_target_seqs 1;

$blastp -num_threads 12 -query ./blastdb/refseq_protein.fasta -db ./blastdb/denovo_pep -out ./RBH/refseq_vs_denovo -evaluate 0.01 -outfmt 7 -max_target_seqs 1

#select top hits

$awk '/^DENV*/' ./RBH/denovo_vs_refseq|awk '{if($3>=70) print$0}'|awk '{print$1,$2}'|sort -u > ./RBH/denovo_refseq_table

$awk '/^NP|^XP/' ./RBH/refseq_vs_denovo|awk '{if($3>=70) print$0}'|awk '{print$1,$2}'|sort -u > ./RBH/refseq_denovo_table

# select same pair

$awk 'NR==FNR{a[$1,$2];next} ($2,$1) in a' ./RBH/denovo_refseq_table ./RBH/refseq_denovo_table > ./RBH/selected_matches

# calculate the length of the protein sequences of denovo assembly and refseq

$awk '/^>/ {if (seqlen)print seqlen;print;seqlen=0;next} { seqlen+=length($0)}END{print seqlen}' ./blastdb/denovo_pep.fasta | awk 'NR%2{s=$0; next}{print s,$0}' OFS="\t" > ./RBH/denovo_pep_length

$awk '/^>/ {if (seqlen)print seqlen;print;seqlen=0;next} { seqlen+=length($0)}END{print seqlen}' ./blastdb/refseq_protein.fasta| awk 'NR%2{s=$0; next}{print s,$0}' OFS="\t" > ./RBH/refseq_protein_length

# calculate the RBH ratio and select better covered refseq
```

```

$join -j 1 -o 1.2,1.1,2.2 <(sort -k1 ./RBH/selected_matches) <(sort -k1
./RBH/refseq_protein_length_mod) > ./RBH/selected_matches_refseq_length

$join -j 1 -o 1.1,1.2,2.2,1.3 <(sort -k1 ./RBH/selected_matches_refseq_length) <(sort
-k1 ./RBH/denovo_pep_length)|awk '{ratio=$4/$3; if(ratio>1) print $0, ratio}' >
./RBH/selected_matches_sigRBHratio_refseq

# get the protein fasta sequences from the selected refseqIDs [RBH ratio based]

$awk '{print $2}' ./RBH/selected_matches_sigRBHratio_refseq >
./RBH/finla_assembly/selected_matches_sigRBHratio_refseq_IDs

#fetch FASTA sequences with better RBH ratio from refseq data

$awk
'BEGIN{while((getline<"./RBH/finla_assembly/selected_matches_sigRBHratio_refseq
_IDs")>0)|[">"$1]=1}/^>/{f=![$1]?1:0}'f' ./blastdb/refseq_protein.fasta >
./RBH/finla_assembly/sigRBHratio_refseq_protein.fasta

#fetch FASTA sequences unique to refseq data by removing matching IDs (orthologs
from RBH)

$awk
'BEGIN{while((getline<"./RBH/selected_matches")>0)|[">"$1]=1}/^>/{f=![$1]?1:0}'f'
./blastdb/refseq_protein.fasta > ./RBH/finla_assembly/unique_refseq.fasta

#fetch FASTA sequences common to de novo and refseq data [from denovo
assembly] (orthologs from RBH)

$awk
'BEGIN{while((getline<"./RBH/selected_matches")>0)|[">"$2]=1}/^>/{f=![$1]?1:0}'f'
./blastdb/denovo_pep.fasta > ./RBH/finla_assembly/common_denovo.fasta

#fetch FASTA sequences common to denovo and refseq data after filtering
significant RBH hits from refseq [from de novo assembly] (orthologs from RBH)

$awk
'BEGIN{while((getline<"./RBH/selected_matches_sigRBHratio_refseq")>0)|[">"$1]=1}
/^>/{f=![$1]?1:0}'f' ./RBH/finla_assembly/common_denovo.fasta >
./RBH/finla_assembly/common_denovo_denovo.fasta

#fetch FASTA sequences unique to de novo data by removing matching IDs
(orthologs from RBH)

$awk
'BEGIN{while((getline<"./RBH/selected_matches")>0)|[">"$2]=1}/^>/{f=![$1]?1:0}'f'
./blastdb/denovo_pep.fasta > ./RBH/finla_assembly/unique_denovo.fasta

# get the CDS fasta sequences from the selected refseqIDs [RBH ratio based]

$join -1 3 -2 1 -o 1.2 <(sort -k3
~/mouli/projects/hydra_regeneration/hmag_genome/ID_maps/IDs_map_mod) <(sort

```

```
-k1 ./RBH/finla_assembly/selected_matches_sigRBHratio_refseq_IDs) |sort -u >
./RBH/finla_assembly/selected_matches_sigRBHratio_refseq_XM_NM_IDs
```

#fetch FASTA sequences with better RBH ratio from refseq data

```
$awk
```

```
'BEGIN{while((getline<".RBH/finla_assembly/selected_matches_sigRBHratio_refseq
_XM_NM_IDs")>0){if(">$1]=1}/^>/{f=![$1]?1:0}f' ./blastdb/refseq_rna.fasta >
./RBH/finla_assembly/sigRBHratio_refseq_cds.fasta
```

```
$join -1 3 -2 1 -o 1.2 <(sort -k3
```

```
~/mouli/projects/hydra_regeneration/hmag_genome/ID_maps/IDs_map_mod) <(sort
-k1 ./RBH/selected_matches) |sort -u > ./RBH/selected_matches_XM_NM_IDs
```

#fetch FASTA sequences unique to refseq data by removing matching IDs (orthologs from RBH)

```
$awk
```

```
'BEGIN{while((getline<".RBH/selected_matches_XM_NM_IDs")>0){if(">$1]=1}/^>/{f=!
[$1]?1:0}f' ./blastdb/refseq_rna.fasta >
./RBH/finla_assembly/unique_refseq_cds.fasta
```

#fetch FASTA sequences common to *de novo* and refseq data [from *denovo* assembly] (orthologs from RBH)

```
$grep ">" ./RBH/finla_assembly/common_denovo.fasta| awk '{split($1,a,">"); print
a[2]}' > ./RBH/finla_assembly/common_denovo_IDs
```

```
$awk
```

```
'BEGIN{while((getline<".RBH/finla_assembly/common_denovo_IDs")>0){if(">$1]=1}/^
>/{f=![$1]?1:0}f' ./blastdb/denovo_cds.fasta >
./RBH/finla_assembly/common_denovo_cds.fasta
```

#fetch FASTA sequences common to *de novo* and refseq data after filtering significant RBH hits from refseq [from *de novo* assembly] (orthologs from RBH)

```
$join -1 3 -2 2 -o 2.1 <(sort -k3
```

```
~/mouli/projects/hydra_regeneration/hmag_genome/ID_maps/IDs_map_mod) <(sort
-k2 ./RBH/selected_matches_sigRBHratio_refseq) |sort -u >
./RBH/finla_assembly/selected_matches_sigRBHratio_denovo_IDs
```

```
$awk
```

```
'BEGIN{while((getline<".RBH/finla_assembly/selected_matches_sigRBHratio_denov
o_IDs")>0){if(">$1]=1}/^>/{f=![$1]?1:0}f'
./RBH/finla_assembly/common_denovo_cds.fasta >
./RBH/finla_assembly/common_denovo_denovo_cds.fasta
```

#fetch FASTA sequences unique to *denovo* data by removing matching IDs (orthologs from RBH)

```

$awk
'BEGIN{while((getline<"/RBH/selected_matches")>0){if(">$2]=1}{/^>/{f=![$1]?1:0}f'
./blastdb/denovo_cds.fasta > ./RBH/finla_assembly/unique_denovo_cds.fasta

# remove line breaks to protein fasta files

$awk '!/^>/ { printf "%s", $0; n = "\n" } /^>/ { print n $0; n = "" } END { printf "%s", n }'
./RBH/finla_assembly/sigRBHratio_refseq_protein.fasta >
./RBH/finla_assembly/sigRBHratio_refseq_protein_nolinebreaks.fasta

$awk '!/^>/ { printf "%s", $0; n = "\n" } /^>/ { print n $0; n = "" } END { printf "%s", n }'
./RBH/finla_assembly/unique_refseq.fasta>./RBH/finla_assembly/unique_refseq_nilinebreak.fasta

$awk '!/^>/ { printf "%s", $0; n = "\n" } /^>/ { print n $0; n = "" } END { printf "%s", n }'
./RBH/finla_assembly/common_denovo.fasta >
./RBH/finla_assembly/common_denovo_nolinebreak.fasta

$awk '!/^>/ { printf "%s", $0; n = "\n" } /^>/ { print n $0; n = "" } END { printf "%s", n }'
./RBH/finla_assembly/common_denovo_denovo.fasta >
./RBH/finla_assembly/common_denovo_denovo_nolinebreaks.fasta

$awk '!/^>/ { printf "%s", $0; n = "\n" } /^>/ { print n $0; n = "" } END { printf "%s", n }'
./RBH/finla_assembly/unique_denovo.fasta >
./RBH/finla_assembly/unique_denovo_nolinebreak.fasta

$awk '!/^>/ { printf "%s", $0; n = "\n" } /^>/ { print n $0; n = "" } END { printf "%s", n }'
./blastdb/denovo_pep.fasta > ./RBH/finla_assembly/denovo_pep_nolinebreaks.fasta

# remove line breaks to CDS fasta files

$awk '!/^>/ { printf "%s", $0; n = "\n" } /^>/ { print n $0; n = "" } END { printf "%s", n }'
./RBH/finla_assembly/sigRBHratio_refseq_cds.fasta >
./RBH/finla_assembly/sigRBHratio_refseq_cds_nolinebreaks.fasta

$awk '!/^>/ { printf "%s", $0; n = "\n" } /^>/ { print n $0; n = "" } END { printf "%s", n }'
./RBH/finla_assembly/unique_refseq_cds.fasta >
./RBH/finla_assembly/unique_refseq_cds_nolinebreaks.fasta

$awk '!/^>/ { printf "%s", $0; n = "\n" } /^>/ { print n $0; n = "" } END { printf "%s", n }'
./RBH/finla_assembly/common_denovo_cds.fasta >
./RBH/finla_assembly/common_denovo_cds_nolinebreaks.fasta

$awk '!/^>/ { printf "%s", $0; n = "\n" } /^>/ { print n $0; n = "" } END { printf "%s", n }'
./RBH/finla_assembly/common_denovo_denovo_cds.fasta >
./RBH/finla_assembly/common_denovo_denovo_cds_nolinebreaks.fasta

$awk '!/^>/ { printf "%s", $0; n = "\n" } /^>/ { print n $0; n = "" } END { printf "%s", n }'
./RBH/finla_assembly/unique_denovo_cds.fasta >
./RBH/finla_assembly/unique_denovo_cds_nolinebreaks.fasta

```



```

# modify protein fasta headers of refseq [remove description and ">" and keep IDs]
$sed 's/\ .*$/g'
./RBH/finla_assembly/sigRBHratio_refseq_protein_nolinebreaks.fasta|sed 's/>//g' >
./RBH/finla_assembly/sigRBHratio_refseq_protein_nolinebreaks_modIDs.fasta

# modify cds fasta headers of refseq [remove description and ">" and keep IDs]
$sed 's/\ .*$/g' ./RBH/finla_assembly/sigRBHratio_refseq_cds_nolinebreaks.fasta|
sed 's/>//g' >
./RBH/finla_assembly/sigRBHratio_refseq_cds_nolinebreaks_modIDs.fasta

$sed 's/\ .*$/g' ./RBH/finla_assembly/unique_refseq_cds_nolinebreaks.fasta|sed
's/>//g' > ./RBH/finla_assembly/unique_refseq_cds_nolinebreaks_modIDs.fasta

# convert no line break protein fasta to tab limited
$awk 'NR%2{s=$0; next} {print s,$0}' OFS="\t"
./RBH/finla_assembly/sigRBHratio_refseq_protein_nolinebreaks_modIDs.fasta >
./RBH/finla_assembly/sigRBHratio_refseq_protein_nolinebreaks_modIDs_tablimited.
fasta

$sed 's/>//g' ./RBH/finla_assembly/common_denovo_denovo_nolinebreaks.fasta
|awk 'NR%2{s=$0; next} {print s,$0}' OFS="\t"
>./RBH/finla_assembly/common_denovo_denovo_nolinebreaks_tablimited.fasta

$awk'NR%2{s=$0; next} {print s,$0}' OFS="\t"
./RBH/finla_assembly/denovo_pep_nolinebreaks.fasta >
./RBH/finla_assembly/denovo_pep_nolinebreaks_tablimited.fasta

# convert no line break cds fasta to tab limited
$awk 'NR%2{s=$0; next} {print s,$0}' OFS="\t"
./RBH/finla_assembly/sigRBHratio_refseq_cds_nolinebreaks_modIDs.fasta>
./RBH/finla_assembly/sigRBHratio_refseq_cds_nolinebreaks_modIDs_tablimited.fast
a

$sed 's/>//g'
./RBH/finla_assembly/common_denovo_denovo_cds_nolinebreaks.fasta| awk
'NR%2{s=$0; next} {print s,$0}' OFS="\t" >
./RBH/finla_assembly/common_denovo_denovo_cds_nolinebreaks_tablimited.fasta

# add de novo IDs to RBH best hit IDs (protein)
$join -j 1 -o 1.1,1.2,2.2 <(sort -k1 ./RBH/selected_matches) <(sort -k1
./RBH/finla_assembly/sigRBHratio_refseq_protein_nolinebreaks_modIDs_tablimited.
fasta) | awk '{print">"$1_"$2,$3}' OFS="\n" >
./RBH/finla_assembly/sigRBHratio_refseq_proteinID_denovoID.fasta

# add de novo IDs to RBH best hit IDs (cds)

```

```

$join -1 3 -2 1 -o 1.2 2.2 <(sort -k3
~/mouli/projects/hydra_regeneration/hmag_genome/ID_maps/IDs_map_mod) <(sort
-k1 ./RBH/selected_matches) |sort -u > ./RBH/selected_matches_NM_XM_denv_IDs

$join -j 1 -o 1.1,1.2,2.2 <(sort -k1 ./RBH/selected_matches_NM_XM_denv_IDs)
<(sort -k1
./RBH/finla_assembly/sigRBHratio_refseq_cds_nolinebreaks_modIDs_tablimited.fasta
a) | awk '{print">"$1_"$2,$3}' OFS="\n" >
./RBH/finla_assembly/sigRBHratio_refseqID_denovoID.fasta

# add refseqIDs to de novo matching sequences (protein)

$join -1 2 -2 1 -o 1.2,1.1,2.2 <(sort -k2 ./RBH/selected_matches) <(sort -k1
./RBH/finla_assembly/common_denovo_denovo_nolinebreaks_tablimited.fasta) |
awk '{print">"$1_"$2,$3}' OFS="\n" >
./RBH/finla_assembly/common_denovo_refseq.fasta

# add refseqIDs to de novo matching sequences (cds)

$join -1 2 -2 1 -o 1.2,1.1,2.2 <(sort -k2 ./RBH/selected_matches_NM_XM_denv_IDs)
<(sort -k1
./RBH/finla_assembly/common_denovo_denovo_cds_nolinebreaks_tablimited.fasta)
| awk '{print">"$1_"$2,$3}' OFS="\n" >
./RBH/finla_assembly/common_denovoID_refseqID.fasta

#merge all sequences

$cat ./RBH/finla_assembly/protein_sequences/*. * >
./RBH/finla_assembly/protein_sequences/hybrid_protein.fasta

$cat ./RBH/finla_assembly/CDS_sequences/*. * >
./RBH/finla_assembly/CDS_sequences/hybrid_cds.fasta

```

## 7) Calculation of completeness of different transcriptome assemblies by BUSCO (version 3.0.2)

### a) training augustus

Initially gene prediction algorithm was trained to get custom specific models for running AGUSTUS. This was achieved through BUSCO wrapper. Here, I have used filtered gene sets from RefSeq genome annotation containing multi exon and single copy genes after removing UTRs.

```
# split test and training set (~1:5)
```

```

$./scripts/randomSplit.pl ./gene_set_filter4_mod_withoutUTR.gb 200
grep -c LOCUS
./gene_filter4_mod_withoutUTR.gb*

```

```
# create new file for hydra vulgaris Ind-Pune
```

```

$./scripts/new\_species.pl --species=HvullIP

```

```
#etrain
```

```
$/bin/etraining --species=HvullP ./ gene_set_filter4_mod_withoutUTR.gb.train
```

```
#test
```

```
$/bin/augustus --species=HvullP ./ gene_set_filter4_mod_withoutUTR.gb.test | tee  
firsttest.out
```

```
#optimize
```

```
$/scripts/optimize\_augustus.pl --cpus=10 --species=HvullP  
./MAKER_filter4_mod_withoutUTR.gb.train --  
metapars=./config/species/HvullP/HvullP_metapars.cfg
```

b) Run BUSCO for each transcriptome assembly or refseq data

```
#busco
```

```
$/scripts/run_BUSCO.py -c 10 --long -sp HvullP -o Hmag1 -i  
/home/hydra/mouli/projects/Hydra_Genome/BUSCO/busco/data/hma.fasta -l  
/home/hydra/mouli/projects/Hydra_Genome/BUSCO/busco/data/eukaryota_odb9 -m  
genome -o out_hmag1
```

```
$python scripts/generate_plot.py -wd ./BUSCO_summaries_hydra_assemblies
```

## 8) Functional annotation by InterProScan (version 5.14-53.0) and BLAST (version 2.2.28+)

```
# functional annotation by InterProScan
```

```
$/interproscan-5.14-53.0/interproscan.sh -i  
/home/hydra/mouli/projects/wnt/new_analysis/denovo_refseq_merge/RBH/finla_asse  
mby/protein_sequences/hybrid_protein.fasta -appl  
ProDom,ProSiteProfiles,PRINTS,Pfam,TIGRFAM --goterms -o  
/home/hydra/mouli/projects/wnt/new_analysis/denovo_refseq_merge/annotation/hybr  
id_protein_interproscan -f TSV
```

```
$awk 'BEGIN {FS="\t"};{print$1"\t"$14}' ./hybrid_protein_interproscan | awk  
'GO:/{print$0}' | sort -u > ./hybrid_protein_interproscan_go_raw
```

```
$awk '{FS="\t"} {for(j=2;j<=NF;j++) a[$1]=a[$1]"\t"$j}END{for(i in a) {print i"a[i]}}'  
./annotation/hybrid_protein_interproscan_go_raw >  
./annotation/hybrid_protein_interproscan_go_WEGO_native_format
```

```
#remove repeted GO IDs per record
```

```
$awk '{ while(++i<=NF) printf (!a[$i]++) ? $i FS:""; i=split("",a); print ""}'  
./annotation/hybrid_protein_interproscan_go_WEGO_native_format >  
./annotation/hybrid_protein_interproscan_go_WEGO_native_format_mod
```

```
# annotation by performing BLAST against ubniref90
```

```
$blastp -query ./RBH/finla_assembly/protein_sequences/hybrid_protein.fasta -db
./blastdb/uniref90 -num_threads 11 -max_target_seqs 1 -outfmt 6 >
./annotation/hybrid_protein_blastp_uniref90.outfmt6
```

```
$awk '{print $2}' ./annotation/hybrid_protein_blastp_uniref90.outfmt6 >
./annotation/hybrid_protein_blastp_hits_uniref90_IDs
```

#go to uniprot retrieve/ID mapping and paste the list of UniRef90 hits and converts IDs (UniRef) to UniProtKB, download as tab limited file and change UNIREF90 to UniRef90.

```
$join -1 2 -2 1 -o 1.1 2.4 -t '$\t' <(sort -k2
./annotation/hybrid_protein_blastp_uniref90.outfmt6) <(sort -k1
./annotation/uniref90_go_IDs.tab)| awk '/GO:/{print $0}' |awk '$1=$1' FS=";" OFS="\t"
|sort -u >./annotation/hybrid_protein_uniref90blastP_go_raw
```

```
$awk '{FS="\t"} {for(j=2;j<=NF;j++) a[$1]=a[$1]"\t"$j}END{for(i in a) {print i"a[i]}}'
./annotation/hybrid_protein_uniref90blastP_go_raw >
./annotation/hybrid_protein_uniref90blastP_go_raw_WEGO_native_format
```

#remove repeated GO IDs per record

```
$awk '{ while(++i<=NF) printf (!a[$i]++) ? $i FS:""; i=split("",a); print ""}'
./annotation/hybrid_protein_uniref90blastP_go_raw_WEGO_native_format >
./annotation/hybrid_protein_uniref90blastP_go_raw_WEGO_native_format_mod
```

\$cat

```
./annotation/hybrid_protein_uniref90blastP_go_raw_WEGO_native_format_mod
./annotation/hybrid_protein_interproscan_go_WEGO_native_format_mod >
./annotation/merged_GO_IDs
```

```
$awk '{FS=" " } {for(j=2;j<=NF;j++) a[$1]=a[$1]"\t"$j}END{for(i in a) {print i"a[i]}}'
./annotation/merged_GO_IDs > ./annotation/merged_GO_IDs_unique
```

#remove repeated GO IDs per record

```
$awk '{ while(++i<=NF) printf (!a[$i]++) ? $i FS:""; i=split("",a); print ""}'
./annotation/merged_GO_IDs_unique > ./annotation/merged_GO_IDs_mod
```

## 9) Read alignment and quantitation by Trinity pipeline (version 2.1.1)

```
#!/bin/bash
```

```
for i in $(ls
/home/hydra/mouli/projects/wnt/new_analysis/refseqbased_DE/tophat/*.fastq|awk -
F"/" '{split($NF,a,"."); print a[1]}'|cut -c -11| sort -u)
```

```
do ./util/align\_and\_estimate\_abundance.pl --thread_count 10 --transcripts
/home/hydra/mouli/projects/wnt/new_analysis/trinity_DE/hybrid_cds_mod.fasta --
seqType fq --left
/home/hydra/mouli/projects/wnt/new_analysis/refseqbased_DE/tophat/${i}_R1.fastq -
-right
```

```
/home/hydra/mouli/projects/wnt/new_analysis/refseqbased_DE/tophat/${i}_R2.fastq -  
-est_method RSEM --aln_method bowtie --prep_reference --output_dir  
/home/hydra/mouli/projects/wnt/new_analysis/trinity_DE/alignment_out/${i}
```

done;

Note: similar command line was used for analysis using different experimental samples. The final count matrix was used in edgeR for differential expression analysis. All the commands listed above are generic and require additional details (directory structure and file names) in order to re-execute them.

### Phylogenetic analysis of PRD class of homeobox genes.

Phylogenetic analysis was carried out using the homeobox genes collected from HomeoDB for human, mouse, zebrafish, fruitfly and nematode <sup>4</sup>(<http://homeodb.zoo.ox.ac.uk>). Sequences from *Nematostella* and sponges were included for comparative analysis based on previous classification <sup>5</sup>. Here, initial broad classification was carried out using CLANS to segregate PRD class members based on BLAST similarity scores using bioinformatic toolkit available at <https://toolkit.tubingen.mpg.de> <sup>6</sup>. Homeobox domain regions were collected from these sequences after performing hmmscan using HMMER v3.1. All the fetched sequences from these group were aligned using ETC3 tool kit <sup>7</sup>. These alignments were cured manually in Jalview v2 and used for further analysis (Waterhouse et. al., 2009). Phylogenetic tree was computed using randomized accelerated maximum likelihood (RAxML-HPC v.8 on XSEDE) implemented in CIPRES Science Gateway <sup>8</sup>. Here, protein CAT model with LG substitution matrix was used with 1000 iterations of rapid bootstrap analysis and HyHox1 is used as an outgroup. The phylogenetic tree was visualized and annotated in iTOL and branch support values above 30 were displayed on branches <sup>9</sup>.

#### 1) PRD class protein sequence files

```
>a1_DR
```

```
MGISEEIKLEELPQEAKLAHPDAVVLVDRAPGSSAASAGAALTVSMSVSGGAPSGASGASGGTNSPVS  
DGNSDCE ADEYAPKRKQRRYRTTFTSFQLEELEKAFSRTHYPDVFTREELAMKIGLTEARIQVWFQNRRAK  
WRKQEKVGPQS HPYNPYLPGGAATMQTVVGAALPPNPFTHLGFQLRKPFDQAHAANLAAFRYPHLSA  
APMIPSGYFNQFQRAPPHM LPHGMAGMYS PSSSFQSLLANMTAVPRGTPLGKPPALLVGS  
PDLHSPNHMLAS PPTSPASGHASQHQQHPTAHP PPQAPPQMPVGVQPAQLSPQHLV  
GIALTQQASSLSPTQTSPVALTLSHSPQRQLPPPSHQAPPPPPRAATPPEDR  
RTSSIAALRLKAREHELKLELLRQNGHNDVVS
```

```
>ALX1_DA
```

```
MEYLSDKFSLKSPAIKGSDYYMDQVMDTLDNVQYYNKASPKCVQAFPMQSNQDQSSMDR  
SSPCDNQSSVITYCAPK SEESLHAMENCCSLRVSPATSGPDKTDLDELGEKCDNSVSSSKRR  
RRTTFTSAQLEELEKVFQKTHYPDVYVR EQLAMRTELTEARVQVWFQNRRAKWRKRERYGQIQ  
QAKSHFAATYDISMLPRTDSYSQISNNLWTGSPSAGSSVVS SCMI PRGSPPCVTS  
PYPHSPRAAEHG YVGFPNHQQNQFGVNHVSLNFFADSL LASSANSHAAFETKPEFERRS  
SIAVLRMKAKEHTANISWAM
```

>ALX1\_HU

MEFLSEKFALKSPPSKNSDFYMGAGGPLEHVMETLDNESFYKASAGKCVQAFGGLPRAEHHVRLERTSPCQDSS  
VNYGITKVEGQPLHTELNRAMDNCNSLRMSPVKGMQEKDELDELGDKCDSNVSSSKRRRHRTTFTSLQLEELEKV  
FQKTHYPDVYVREQLALRTELTEARVQVWFQNRRAKWRKRERYGQIQQAKSHFAATYDISVLPRTDSTYPQIQNNL  
WAGNASGGSVVTSCMLPRDTSSTCMTYPYSHSPRTDSSYTGFSNHQNFQSHVPLNFFFTDSSLTGATNGHAFETKPE  
FERRSSIAVLRMKAKEHTANISWAM

>ALX1\_MO

MEFLSEKFALKSPPSKNSDFYMGTTGGALEHVMETLDNESFYKATAGKCVQAFGGLPRAEHHVRLDRTSPCQDSS  
VNYGITKVEGQPLHTELNRAMDNCNNLRMSPVKGMPEKSELDELDELGDKCDSNVSSSKRRRHRTTFTSLQLEELEKV  
FQKTHYPDVYVREQLALRTELTEARVQVWFQNRRAKWRKRERYGQIQQAKSHFAATYDISVLPRTDSTYPQIQNNL  
WAGNASGGSVVTSCMLPRDASSCMTYPYSHSPRTDSSYTGFSNHQNFQSHVPLNFFFTDSSLTGATNGHAFETKPE  
FERRSSIAVLRMKAKEHTANISWAM

>ALX3\_HU

MDPEHCAPFRVGPAPGPYVASGDEPPGPGQTPAAAPHLHPAPPRGPRLTRFPACGPLEPYLPEPAKPPAKYLQDL  
GPGPALNGGHFYEGPAEAEKTSKAASFPQLPLDCRGGPRDGPNSLQSGPGCLASLHPLSPGLPDSMELAKNK  
SKKRRNRRTTFTSTFQLEELEKVFQKTHYPDVYAREQLALRDLTEARVQVWFQNRRAKWRKRERYGKIQEGRNPFT  
AAYDISVLPRTDSTHQPQLQNSLWASPGSGSPGGPCLVSPGPIPCSPCMSPYSHPHGVSAGFMGVPAPSAHPGIYSI  
HGFPPTLGGHSFEPSSDGDYKSPSLVSLRVKPKPEPGLLNWT

>ALX3\_MO

MDPERCAPFSVGPAAAGPYAAAGDEAPGPGQTPDAAPHLHPAPPRGPRLSRFPACGPLEPYLPEPAKPPAKYLQDL  
GPGPVLNGGHFYEGSAEAEKASKAASFPQLPVDCRGGPRDGPNSVQASPGCLASLSVPLSPGLPDSMELAKTK  
SKKRRNRRTTFTSTFQLEELEKVFQKTHYPDVYAREQLALRDLTEARVQVWFQNRRAKWRKRERYGKMQEGRNPFT  
TAYDISVLPRTDSTHQPQLQNSLWSPSGSGSPGGPCLMSPEGIPSPCMSPYSHSHGNVAGFMGVPASPAHPGIYSI  
HGFPALGGHSFEPSPDGDYKSPSLVSLRMKPKPEPGLLNWT

>ALX4\_HU

MNAETCVSYCESPAAAMDAYYSPVSQSREGSSPFRAGFGDKFGTTFLSAAAKAQGFDAKSRARYGAGQQDLAT  
PLESGAGARGSFNKFQPPSTPQPQPPPPQPQPPQPPQPPQPPAQPPLYLQRGACKTPPDGSLKLQEGSSGHSAAL  
QVPCYAKESSLGEPELPPDSDTVGMDSSYLSVKEAGVKGPQDRASSDLPSPLEKADSESNKGKRRNRRTTFTSYQ  
LEELEKVFQKTHYPDVYAREQLAMRDLTEARVQVWFQNRRAKWRKRERFGMQQVVRTHFSTAYELPLLTRAENY  
AQIQNPSWLGNNGAASVPVPCDVPVPCMSPHAHPPGSGASSVTDFLSVSGAGSHVQTHMGSLFGAASLSP  
GLNGYELNGEPDRKTSSIAALRMKAKEHSAAISWAT

>ALX4\_MO

MNAETCVSYCESPAAAMDAYYSPVSQSREGSSPFRGFGDKFGTTFLSAGAKGQGFDAKSRARYGAGQQDLAA  
PLESSSGARGSFNKFQPPPTPQPPPAPPAPPAPHLYLQRGACKTPPDGSLKLQEGSSGHNAALQVPCYAKESNLG  
EPELPPDSEPVGMDNSYLSVKETGAKGPQDRASAEIPSPLEKTDSESNKGKRRNRRTTFTSYQLEELEKVFQKTH  
YPDVYAREQLAMRDLTEARVQVWFQNRRAKWRKRERFGMQQVVRTHFSTAYELPLLTRAENYAQIQNPSWIGNN  
GAASVPVPCDVPVPCMSPHAHPPGSGASSVSDFLSVSGAGSHVQTHMGSLFGAAGISPLNGYEMNGEPD  
RKTSSIAALRMKAKEHSAAISWAT

>ALX4a\_DA

MNAETCVSYCEMSTMSDSSYSPSAPQGRDHQANPFRFTFQASDTKYSPAFLTNKGQGYGEKSGSPFQQEQCSLDATA  
GEGTFNKYHLFMQRSSCKTPPDSSKLQEQNSGHNGGLIACYGKDSTGLTDSELQNSDPAGMDGYSVSKDSGVK  
SPQQATSELASPLDKTEGESNKGKRRNRRTTFTSYQLEELEKVFQKTHYPDVYAREQLALRDLTEARVQVWFQNR  
RAKWRKRERFGMQQVVRTHFSTAYELPLLTRPENYAQIQNPSWIGGSSAASVPVPCVPCDSTSCMPHPHAA  
SGVSDFLGVSPSGSHMQTHMGSLFGSPMGGTGINGYDLNMDPDRKSSSIAALRMKAKEHSAAISWAT

>ARX\_DA

MSSQYDDDSRDRSECKSKSPTVLSSYCIDSI LGRRSPCKVRLGAQSLPAPVRPDHEMTTEVTSKENSFDSMDHL  
PPKLRLRYGPGGKYLDSEGRGFHEHLEKGERERLLDQACESLKISQAPQVSI SRKSYRENAPFSQSDEGQSPPEHM



NPQAPGVSGTSSSSGKVVTVDSPHNHNPAISRSAIKQFSSTVAAAAAFSAFDPAIISVAAHQYAAAITNGTVPAGL  
FSVPQYSINLAAFAAAHSKSSSIADLRMKAKKHSESLGLQADMVL

>CG9876\_DR

MLNYQQQLHSLPVGPNPGNFYFGPTVSGEIIYSSHQSHNLESEDKLEDREESGRNLDKIHRFSVDNIMEMKHDAYSK  
GKMAMELSSNFGPTGAGCGGADRPAPCSGNLPAGGGHHSRKRPRNRRTTFSSAQLTALEKVFERTHYPDAFVREEL  
ATKVHLSEARVQVWFQNRRAKFRRNERSVGSRTLLDTAPQLVPAPISNNMHKYANIPHPHPQPPPPGAYALNFG  
PLELRSCQNYTNCYGGFGSSGASGSGVCSFFGATNYCVAANYAKNAYPPL

>crx\_DA

MMSYIKQPHYAVNGLTLSASGMDLLHTAVGYPATPRKQRRERTTFTRTQLDILEALFTKTRYPDI FMREEVALKI  
NLPESRVQVWFKNRRAKCRQQQQQTSGQPKPRPPKKS SPPDLTSDPGTSSSVVAAPTPTVPPSVSAGTAPVSV  
WSPTLSPLPDLPCSGTPCVQRPAYPMSYQPSYSQYGSSPYFSGLD CSPYLS PMTTQLSASGGALSPLTV  
PSMGGSLSQSPSLSSQGYSTASLGFSSVDCLDYKDQQAWKLNFS TVDCLDHKFQVL

>CRX\_HU

MMAYMNPMPHYSVNALALS GSPVDLMHQAVPYPSAPRKQRRERTTFTRS QLEEELEALFAKTQYPDVYAREEVALK  
INLPESRVQVWFKNRRAKCRQQRQQKQQQQPPGGQAKARPAKRKAGTSPRPSTDVCPDPLGISDSYSPPLPGPS  
GSPTTAVATVSIWSPASESPLPEAQRAGLVASGSLTSAPYAMTYAPASAFCS SPSAYGSPSSYFSGLDPYLSPM  
VPQLGGPALSPLSGPSVGP SLAQSP TSLSGQSYGAYSPVDSLEFKDPTGTWKFTYNPMDPLDYKDQSAWKFIIL

>CRX\_MO

MMAYMNPMPHYSVNALALS GPNVDLMHQAVPYSSAPRKQRRERTTFTRS QLEEELEALFAKTQYPDVYAREEVALK  
INLPESRVQVWFKNRRAKCRQQRQQKQQQQPPGAQTKARPAKRKAGTSPRPSTDVCTDPLGISDSYSPSLPGPS  
GSPTTAVATVSIWSPASEAPLPEAQRAGLVASGSLTSAPYAMTYAPASAFCS SPSAYASPSYFSGLDPYLSPM  
VPQLGGPALSPLSGPSVGP SLAQSP TSLSGQSYSTYSPVDSLEFKDPTGTWKFTYNPMDPLDYKDQSAWKFIIL

>DMBX1\_HU

MQHYGVNGYSLHAMNSLSAMYNLHQAAQQAQHAPDYRPSVHALTLAERLAGCTFQDII LEARYGSQHRKQRRSR  
TAFTAQQLEALEKTFQKTHYPDVVMRERLAMCTNLPEARVQVWFKNRRAKFRKKQRS LQKEQLQKQKEAEGSHGE  
GKAEAPTPTDQLDTEQPPRLPGSDPPAELHLSLSEQSASESAPEDQPDREEDPRAGAEDPKAEKSPGADSKGLGC  
KRGSPKADSPGSLTITPVAPGGGLLGP SHSYSSSPLSLFRLQE QFRQHMAATNNLVHYS SFEVGGPAPAAAAAAA  
AVPYLGVNMAPLGLSLHCQSYYSLSAAAAAHQGVWGSPLL PAPPAGLAPASATLNSKTTS IENLRLRAKQHAASL  
GLDTLPN

>DMBX1\_MO

MQHYGVNGYSLHAMNSLSAMYNLHQAAQQAQHAPDYRPSVHALTLAERLAGCTFQDII LEARYGSQHRKQRRSR  
TAFTAQQLEALEKTFQKTHYPDVVMRERLAMCTNLPEARVQVWFKNRRAKFRKKQRS LQKEQLQKQKEAEGSHGE  
GKVEAPASDTQLETEQPPGLPSGDPPAELQLSLSEQSASESAPEDQLDREEDSRAEEPKAEKSPGESKVP GCKR  
GSPKADSPGSLAITPAAPGGGLLGP SHSYSSSPLSLFRLQE QFRQHMAATNNLMHYS SFEVGGPAPAAAAAAA  
VPYLGVNMAPLSSLHCQSYYSLSAAAAAHQGVWGSPLL PAPPAGLAPASAAALNSKTTS IENLRLRAKQHAASL  
LDTLPN

>DMBX1a\_DA

MQHYGVNGYSLHAMNSLSAMYNLHQAAQQAQHAPDYRPSVHALTLAERLADI ILEARYGSQHRKQRRSR TAFTA  
QQLEALEKTFQKTHYPDVVMRERLAMCTNLPEARVQVWFKNRRAKFRKKQRS LQKEQLQKQKDVSTDGALAASDK  
DEAPSTLNLENQPPSSSTSSSSSMEAEAAAPHALGSELSVELNVTSAEQSGSESATEDNATDKEEIKQHREDLKVE  
KEPAPGNLSPLCKRLSPKPDSP LGSPAISSSSSGVTGGISQSHSYSSSPLSLFRLQE QFRQHMAATNNLVHYP SF  
DMATPSSI PYLGMNVNMPAPLGLSLPCQSYYSLSHHAQQVWNSPLLQASGGLPSHNSKTTS IENLRLRAKQHAAS  
LGLDTLPN

>DRGX\_DA

MFYFHCPPQLEGECCRTNTLNTNGFGNHASGDFDDGFLRRKQRRNRRTTFTLQQLEALEAVFAQTHYPDVFTREEL  
AMKINL TEARVQVWFQNRRAKWRKTERGTSEQDGGKEQMNEGNPPARNLNQSPVDHSRSKKEPMELQQNINRVVG



SGGPPFFPSCPLPGTLLNTATYAQALSQVATLKGSPLCSCCVDPDMGLSFLPPYGCQSNRTASVAALRMKAREHSEA  
VLQSANLLGTGSTTGAAGPALPLSQNTGGDSSPNSSTSKITSLRRTPKHLHCQKEGPKK

>DRGX\_DR

MFCYQCPPALHPCGPHPPRLPTLDYFPAATHPYTSYSYHPAIHDETFVRRKQRRNRRTFTLQQLLEELETAFAQTH  
YPDVFTREDLAMKINLTEARVQVWFQNRRAKWRKAERLKDQKRENGESSSSLDKLHDSRESSPDITGEIDDDM  
DDLPPRQRSHSPLANGQMEQQHSHSHSHSHSRSPGGMHLSDSDNERPLSSNQLTATPHSASQSLGSI SAGSPSP  
SGMHREREHTPLVGGGGQGPSSPSNSRNTDSPIEVGGPMSLTTGSRMAASSNNSASSTPTPTTPHAPQMPHSSAA  
AAAAFGSHIFGNFGGGSNASDSNCGFRPVLSEQSAVAAAAAAAQORSANHPPLFLPHLAAQFTHQPLFPGLKG  
VSPFQSLCSCCSLKPPPPPGSSVVAPLSIPVSSSSAASSPESPSSGQGSVHDPNSVAELRRKAQEHS AALLQ  
SLHAAAAAGLAFPLHLPLSFAHHPALGQHVVNHNNTMRMKHEAQDMTMNGLPGSGSGSGSAGGTTSSA  
ALLDLAESAVAYQQQQHATLSPPTTPTQQSSGGVAATEGSPGSGAIAGSGSLNGNVVLTKME

>DRGX\_HU

MFYFHCPPQLEGTATFGNHSSGDFDDGFLRRKQRRNRRTFTLQQLLEALEAVFAQTHYPDVFTREELAMKINLTEA  
RVQVWFQNRRAKWRKTERGASDQEPGAKEPMAEVTPPPVRNINSPPPGDQARSKKEALEAQQLGRVTGVPAGPFF  
PSCPLPGTLLNTATYAQALSHVASLKGGPLCSCCVDPDMGLSFLPTYGCQSNRTASVATLRMKAREHSEAVLQSAN  
LLPSTSSSPGPVAKPAPPDGSQEKTSPTKEQSEAEKSV

>DRGX\_MO

MFYFHCPPQLEGTAPFGNHSTGDFDDGFLRRKQRRNRRTFTLQQLLEALEAVFAQTHYPDVFTREELAMKINLTEA  
RVQVWFQNRRAKWRKTERGASDQEPGAKEPMAEVTPPPVRNINSPPPGDQTRSKKEALEAQQLGRVTGPTGPFF  
PSCPLPGTLLNTATYAQALSHVASLKGGPLCSCCVDPDMGLSFLPTYGCQSNRTASVAALRMKAREHSEAVLQSAN  
LLPSTSSSPGPASKQAPPEGSQDKTSPTKEQSEGEKSV

>DU4L2\_HU

MALPTPSDSTLPAEARGRGRRRRLVWTPSQSEALRACFERNPYPGIATRERLAQAIGIPEPRVQIWFQNERSRQL  
RQHRRESRPWPGRGPPEGRKRRTAVTGSQTALLLRAFEKDRFPGIAAREELARETGLPESRIQIWFQNRRAHHP  
GQGGRAPAQAGGLCSAAPGGGHPAPSWVAFHAHTGAWGTGLPAPHVPCAPGALPQGAFVSAARAAPALQPSQAAP  
AEGVSPAPARGDFAYAAPAPPDGA LSHPQAPRWPPHPGKSREDRDPQRDGLPGPCAVAQPGPAQAGPQQGVLA  
PPTSQGSPPWWGWRGPQVAGAAWEPQAGAAPPQAPPDASASARQGMQGI PAPSQALQEPAPWSALPCGLLLD  
ELLASPEFLQQAQPLLETEAPGELEAASEEAASLEAPLSEEEYRALLEEL

>DUX4\_HU

MALPTPSDSTLPAEARGRGRRRRLVWTPSQSEALRACFERNPYPGIATRERLAQAIGIPEPRVQIWFQNERSRQL  
RQHRRESRPWPGRGPPEGRKRRTAVTGSQTALLLRAFEKDRFPGIAAREELARETGLPESRIQIWFQNRRAHHP  
GQGGRAPAQAGGLCSAAPGGGHPAPSWVAFHAHTGAWGTGLPAPHVPCAPGALPQGAFVSAARAAPALQPSQAAP  
AEGISQAPARGDFAYAAPAPPDGA LSHPQAPRWPPHPGKSREDRDPQRDGLPGPCAVAQPGPAQAGPQQGVLA  
PPTSQGSPPWWGWRGPQVAGAAWEPQAGAAPPQAPPDASASARQGMQGI PAPSQALQEPAPWSALPCGLLLD  
ELLASPEFLQQAQPLLETEAPGELEAASEEAASLEAPLSEEEYRALLEEL

>DUXA\_HU

MAEDTYSHKMVKTNHRRCRTKFTEEQLKILINTFNQKPYPGYATKQKLAL E INTEESRIQIWFQNRRAHGFQKR  
PEAETLESSQSQGDQPGVEFQSREARRCRTTYSASQLHTLIKAFMKNPYPGIDSREELAKEIGVPESRVQIWFQ  
NRRSRLLLQKREPVASLEQEEQKIP E GLQGAEDTQNGTNFTSDSHFSGARTW

>ey\_DR

MRNLPCLGTAGGSGLGGIAGKPSPTMEAVEASTASHRHSTSSYFATYYHLTDDECHSGVNQLGGV FVGG RPLPD  
STRQKIVELAHSGARPCDISRILQVSNCGVSKILGRYYETGSIRPRAIGGSKPRVATAEVVSKISQYKRECPSIF  
AWEIRDRLLOENVTNDNIPSVSSINRVLRLNLA AQEQSTGSGSSSTSAGNSISAKVSVSIGGNVSNV ASGSRG  
TLSSSTDLMQTATPLNSSESGGASNSGEGSEQEAIEKLRLLNTQHAAGPGLPAPARAAPLVGQSPNHLGTRSSH  
PQLVHGNHQALQQHQQSWPPRHYSWSWYPTSLSEIPISSAPNIASVTAYASGPSLAHSLSPNDIESLASIGHQ  
RNCPVATEDIHLKKELDGHSDETGS GEGENSNGGASNIGNTEDDQARLILKRLQRNRTSFTNDQIDSLEKEFE  
RTHYPDV FARERLAGKIGLPEARIQVWFSNRRAKWRREEKLRNQRTPNSTGASATSSSTSATASLTDS PNSLSA  
CSSLLSGSAGGSPSVSTINGLSSPSTLSTNVNAPT LGAGIDSSSEPTPIPHIRPCTSDNDNGRQSEDCRRVCSPC

PLGVGGHQNTHHIQSNQHAQGHALVPAISPRLNFNSGSGFAMYSNMHHTALSMSDSYGAVTPIPSFNHSAVGPLA  
PPSPIPQQGLTPSSSLYPCHMTLRPPPMAPAHHHIVPGDGRPAGVGLGSGQSANLGASCSGSGYEVLSAYALPP  
PPMASSAADSSFSAASSASANVTPHHTIAQESCSPCSSASHFGVAHSSGFSDDPISPAVSSYAHMSYNYASSA  
NTMTPSSASGTSAHVAPGKQQFFASCIFYSPWV

>eyg\_DR

MSQHRLLEFSRFGGLRGYDIAQHMLTQQGAVSKLLGSLRPPGLIGGSKPKVATPTVVSKEQYKRENPTIFAWEI  
RERLISEGVCTNATAPSVSSINRILRNRAAERVATEFARTAAAGLYPPPPHPYGSFTWHPAGNVPGGQGVPPPPP  
PSALWSVAAPTLANLPPSAASAVPVSTCGSLSSAHLMAGGAGGTPTNRAISPGSGSHDTLESADENRHIDSDYLD  
DDDEPKFRNRRTTFSPEQLEELEKEFEKSHYPCVSTRELRSSRTSLSEARVQVWFSNRRAKWRRHQRMNLLKRQR  
SSPANPLHSQQSNDAPASSPTPSNHSSASTSAPVAVPPPPQQPLPLCGDHSPPQPPSVLLHPLHGPPGGHHHHH  
PLHLPTHPAALQLLSHYHQOQQOQQOQHQQOQQOQLSPSGCNPAANHLSMGGERSAFRSLVSSPSAPA  
FLGLARQYAVAASLTVAEEQSRSLHYSAGGLGSGGEGTGPNTNTTQSGGSTMTVDNSSSDSDEEINVHDDSRW

>gsb\_DR

MAVSALNMTPYFGGYPFQGGQGRVNLGGVFINGRPLPNHIRRQIVEMAAAGVRPCVISRQLRVSHGCVSKILNRF  
QETGSIRPGVIGGSKPRVATPDIESRIEELKQSQPGIFSWEIRAKLIEAGVCDKQONAPSVSSISRLLRGSSGSGT  
SHSIDGILGGGAGSVGSEDESEDDAEPSVQLKRKQRRSRTTFSNDQIDALERIFARTQYPDVYTREELAQSTGLT  
EARVQVWFSNRRARLRKQLNTQQVPSFAPTSTSFATPTTSAAPAPNMGMSSLYSSQSWPSSGAYENHAAYGGSVA  
SMSPASSTSGTSSAAHSPVQTQAQQPGTGSEFMTSTYGVGSSNATYPSAAYSMPQTPATSAEQLRSQFASAAASG  
SHHPSTWDSYNFAGSFFPPASAAGNHISGYHHQVDQKSSMMTTAPTYPYFGF

>GSC\_DA

MPAGMFSIDSILAGRPSCKDSVLLHRNAPVVFNSLTESLYTAAGDFNGLYSHTGPPAPNLQSVNGRIGYNNYYYYG  
QLHVQGPPTGACCGAIPTLGSQQCPCTPTGYDSAGSVLISPVPHQMMSYMNVGTLRSRTELQLLNQLHCRKRHR  
TIFTDEQLEALENLQFQETKYPDVGTRQQLARKVHLREEKVEVWFKNRRAKWRRQKRSSEESSENSQKWNKSTKTT  
SEKIEEGKSDVSDS

>GSC\_DR

MLAQMVETNSPPAGYTLKRSPSDLGEGQQPPRQISRSPGNTAAYHLTTAMLLNSQQCGYLGQRLQSVLQQQHAQH  
QQSQSQTTPSSDDGSQSGVTILEEERRGGAAAASLFTIDSILGSRQQGGGTAPSQGSHEISSNGNQNGLTSNGISLG  
LKRSGAESPASPNSSSSAAAASPIRQRPVAMLQHPGLHLGHLAAAAASGFAASPSDFLVAYPNFYPNYMHAAA  
VAHVAAAQMQAHVSGAAAGLSGHGHHPHHPHGHPLGHHHGHHLHLGHGPPPKRKRHRHTIFTTEEQLQ  
LEATFDKTHYPDVLREQLALKVDLKEERVEVWFKNRRAKWRKQKREEQERLRKLQEEQCGSTTNGTTNSSSGTT  
SSTGNGSLTVKCPGSDHYSAQLVHIKSDPNGYSDADESSDLEVA

>GSC\_HU

MPASMFSIDNILAARPRCKDSVLPVAHSAAPVVFALHGDSLYGASGGASSDYGAFYPRPVAPGGAGLPAAVSG  
SRLGYNNYFYGQLHVQAAPVGPACCGAVPPLGAQQCSCVPTPPGYEGPGSVLVSPVPHQMLPYMNVGTLRSRTELQ  
LLNQLHCRKRHRHTIFTDEQLEALENLQFQETKYPDVGTRQQLARKVHLREEKVEVWFKNRRAKWRRQKRSSE  
SENAEKWNKTSSSKASPEKREEEGKSDLSDS

>GSC\_MO

MPASMFSIDNILAARPRCKDAVLPVAPSAAAPVVFALHGDSLYGAGGGTSSDYGAFYPRPVAPGGAGLPAAVGS  
SRLGYNSYFYGQLHVQAAPVGPACCGAVPPLGAQQCSCVPTPPGYEGPGSVLVSPVPHQMLPYMNVGTLRSRTELQ  
LLNQLHCRKRHRHTIFTDEQLEALENLQFQETKYPDVGTRQQLARKVHLREEKVEVWFKNRRAKWRRQKRSSE  
SENAEKWNKTSSSKASPEKREEEGKSDLSDS

>GSC2\_HU

MAAAAGGAASRRGAGRPCPFSIEHILSSLPERSLPARAACPPQFAGRQSPAKPEEPGAPEAAAPCACCCCGPRAA  
PCGPPEAAAGLGARLAWPLRLGPAVPLSLGAPAGGSGALPGAVGPGSQRRTRRHRTIFSEEQLQALEALFVQNY  
PDVSTRERLAGRIRLREERVEVWFKNRRAKWRHQKRASASARLLPGVKKSPKGC

>GSC2\_MO

MATAGSAASRRDPGRPCPFSSIEHILSSLPERRPATRPPQVGGRNPAELDEPEAPVPAAPCACCNCNPRRAATRG  
TPETAGLRLAWPLRLAPATPSPLTAPRAGSPALTGTSGPGPQRRTRRHRTIFSEEQLQALEALFVQNYQYDPVGR  
ERLAVRIRLREERVEVWFKNRRRAKWRHQKRASSSRLLPGTTKTPKESC

>HBN\_DR

MMTTTTSQHHQHHPIMPPAMPAPVQESPVSRPRAVYSIDQILGNQHQIKRMYTPSEVLITHPHHGHPHHIIHLLH  
SSNSNGSNHLSHQQQQHSQQQHSSQQQQQQQQLQVQAKREDSPTNTDGGLDVDNDDELSSSLNNGHDLSDMERP  
RKVRRSRTTFTTFQLHQLERAFEKTQYPDVFTREDLAMRLDLSEARVQVWFQNRRAKWRKREKFMNQDKAGYLLP  
EQGLPEFPLGIPLPPHGLPGHPGSMQSEFWPPHFALHQHFNPAAGLLPQHLMAPHYKLPNFHTLLSQYMGL  
SNLNGIFGAGAAAAAASAGYPQNLSLHAGLSAMSQVSPPCSNSSPRESKLVPHPTPPHATPPASGNGGGGLL  
TGGLISTAAQSPNSAAGASSNASTPVSVVTKGED

>HESX1\_DA

MASLANSPSVFTIDSILGLDRPEQRTCPYRPWTDVKPACQNRVVTENDAPVDVRGNEDGKSFSKSPDTSYRRTL  
NWIIGRRPRTAFSSVQIKILESQVNSYPGIDIREELAKKLHLEDRIQIWFQNRRAKLRKSHRESQFLMVKNV  
LSDLQTGREEH

>HESX1\_HU

MSPSLQEGAQLGENKPCSTCSFSIERILGLDQKKDCVPLMKPHRPWADTCSSSGKDGNLCLHVPNPPSGISFPSV  
DHMPPEERASKYENYFASERLSLKRELSWYRGRPRRTAFQNTQIEVLENVFRVNCYPGIDIREDLAQKLNLEED  
RIQIWFQNRRAKLRKSHRESQFLMAKKNFNTNLE

>HESX1\_MO

MSPSLREGAQLRESKPAPCSFSIESILGLDQKKDCTTSVRPHRPWTDTCGDSEKGGNPLHAPDLPSETSFPCPV  
DHPRPEERAPKYENYFASETRSLKRELSWYRGRPRRTAFQNTQIEVLENVFRVNCYPGIDIREDLAQKLNLEED  
RIQIWFQNRRAKMRSRRESQFLMAKKNFNPDLK

>XP\_002159617.3\_DENV\_036790

MLEQWSDDNKMEIFKPOQSGELTCNVDKRSINEDGVGQVICLENPHLLKTLQEHSLAAATVSNLNINIKRFNDAK  
ENKNTCRDNHGGINQLGGTFVNGRPLIEPVRKIVELAHQGVPCDISRQLRVSHGCVSKILSRFYETGSVVRPGV  
IGGSKPKVATPSVVAKIQEYKQHNPTMFAWEIRDKLLSEQICSDSVPSVSSINRIVRNRLGSSSHASMAADLNSP  
LLKIDPDMTHYFVHPGLPIQIGAISTNFPGSIHAHLPRTTSGSYSISGILGMAVPSQGNLGTLMCSDYSIPNV  
QQIHSVHLNDEKGNVHIMQEGEIAPSIDHPTQVNANEYVLESSDSFDSSAASSSSLSNEEDKFSNEQINKPYM  
KMDLNFDSENEKNTNKKTSMQINDVDDSKFDMSLQSTIHAFSHSNEQTNHTFKKAMRRVRTTFSLEQRRLEDA  
FEKTPYPDAEQREEISIQCDLPEPRVQVWFSNKRAKLRRQDRNEDKQDSSKNKEMISSHLDFQRIQNHKQYDCK  
NNSEENNQSCFPDEYQDQINVHDDVKNCLLNSELNTSTTDHRTNRVLSEIKTSDSATNSCSLPPVSTLTKSTNQ  
HHDDGWP HQQRKLFVLGNY

>XP\_002160848.1

MRELNNHEYQNRFSNGKRKQRRYRTTFTQFQDELERAFDKTHYPDVFMRREELAVRVHLTEARVQVWFQNRRAK  
WRKREKLSYNVHQHGSNGEVSSPYHISTSPKIQSQRPVSSQMPPLSHHTAFQPWAQSPYCPQSTSPYPQYP  
HYQQSSMIGNYARPSYQYMSHHTGSVISSTPENLSPQDSQFTGHSSFNKLGQNQLIFA

>XP\_002161581.1

MARNYSSEFSNMGWSSPYNGVPSYSSMPSGFPYHSNVNMHYPLAPSCGFPRKQRRERTTFTKSQLEILEELFLKT  
HYPDIFMREEAARKINLPESRVQVWFKNRRRAKHRQKAKQDKTQKKTNSISSENSDIKPDTSPPASLSPKTSVPS  
PESPCYKSNNNASTSSTSSPINSIWRPAKSTSLYDNTHSRNYPTSPILSPCANNVSPYNPPSYLSQQPYIRSTHH  
YPSYVNINSNGPAGSEHSSHSSNGIIDFPFHYQNMHSSTPWGYATM

>XP\_002162903\_DENV\_003026

MFTWDEKISREYSLAKCCNDHTIVEDDYAMCRSKQRRNRRTFSKQQLMELELTFQKKHYPDINTREALAEQIGI  
TEARIQVWFQNRRAKWRKLSTTKQRQLQREANNRYSSIDTWLEELKSRKHDISKELLTVKESPPVNDYANNLYK  
DKKIKIDNEEKSVERTSPFDSRQRSTEQERVRYLHQFPYMYSSPSPYPHFSCPKTCHVASCFLIKKPSYV  
KKELNFLECLDEHTRRGVIRIGYKYPEDLHKNFKEPEIKEEKFLPSRW

>XP\_002168027.1\_DENV\_045465

MIVYNQSHNSEPELQQEDNAAFDQNMNIDRKKHTSYSIRDILGLKEGIKSNGEVSLGNSFVDAIPSTRSPQFPE  
SDSVSSPESSRSPTSPSLRVQSLNIGGSISGDDCETLDSPTLDNDGALTSDEVSPTVLDTYRQQALSMPSSKRRY  
RTTFTTHQLDELERVFNRTHTYPDIFLREEMAVKLGLEARTIQVWFQNRRAKWRKRKSTSLSSPTSPPLPQLNN  
YLKPYTPTQPSTPFNNSISNSLFLKSLNHPSQTEKFNRFNGSLSTKLEPWYENNIRYIHRNIYNYDSRSINNGYR  
LIDKDQPLSWWPVHGQPV

>XP\_004208605.2\_DENV\_021903

MESQSSKLSFSIERILTTPSTKKHEITRTHGIFLLKPCEMFFYPSDAVQRPIISCSKNERYKLPYRKKEIKFCK  
MMSKKVFMDEKDRFSLSQKAILRQHPTPEHPTPEKIKGQPILCQTGYLRSSLEGSNISYCKVTSNSDDVSNLIEN  
NKRNRITFSSKQSCVLEDFVFKKTHYPDLKCRYEISQQTCLAENRIQVWFQNRRAKWRRTKRVWGEYSIMAKYGLY  
GAMVRHSLK

>XP\_012556935.1\_DENV\_099801

MMPVSSCKLKYCPCRLPDSSSLPDRKYVENSFSYKFGMETLHLQKVPSYRTVSYRNFNELNSKFINQYSSLKYSI  
DDMQERHFLQDKQLRCTSLQDNQSRCTSLQNNQLYCTSLQNKQLYCKKLDLNSYYCTSQNGYRRIRMRTNFSWP  
QLEELETAFFKSYYPDVYTTREVLALKLEIAESRIQVWFQNRRAKWRKAERNLLINNNIDNTQVESKSKTENLSLK  
HKIPNAAKEELSTVAITDNSAASIDENKTTNLRQDKSVQEWVVKLTYKNKTEHSDDFCWKQNVFEKNDDFNRPV  
PKLIPISKNFSGSKLD

>XP\_012557153.1

MFTWDEKISPKCCNDHTIVEDDYAMCRSKQRRNRRTTFSKQQLMELELTFQKKHYPDINTREALAEQIGITEARI  
QVWFQNRRAKWRKLSSTTKQRQLQREANNRYSSIDTWLEELKSRKHDISKELLTVKKESPPVNDYANNLYKDKKIK  
IDNEEKSVIEIRTSFPDSRQRSTEQERVRYLHQFPYMYSSPSPYPSPHFSCPCKTCHVASCFLIKKPSYVKKELN  
FLECLDEHTRRGVIRIGYKYPEDLHKNFKEPEIKEEKFLPSRW

>XP\_012558124.1\_DENV\_044489

MIHKPMAKMQFSIDMILGNSKSEEKQQNDVKLQREFNQEKGINVSSITIRFNSPISSEIKNDEIEGENRQKLRNR  
TTFTTYQLHQLERSFDKTQYDPVFTRENALKLDLSEARVQVWFQNRRAKWRKREKLSFGNSPNSVCSAIEYH  
QDSQISIPVPILEVTPIVKRSFIANKQSCSCSHITDNKHLGYDNSSLIKPTLPHCTARSCLYGGKRHKNRFS  
DLRCSHEENFNKRTFHKIIYQEPENRRYTDLSDHTDHLRYSYFH

>XP\_012559896.1\_DENV\_052386

MSWSYSPTPPFPLSHHVSNNYSAYFPYNYNGFPRKQRRERTTFTKFQLEILDNLFKETKYPDVFLREDVARRISL  
PESRVQVWFKNRRAKHRQKSKKPFQSDKDCLEKLCSSSTVVNNKQSRNTVSIILPAKSVEAVFKANNSESQSSFD  
VNQQAIRQNSSFNSSNQIISAALEKSQTFPCYLPTSLSSYRPFLEAHSSTYSSAQARSFYSNYAQAPVEYQSC  
VVNFNNSQAVSTQWTNYGSSI

>XP\_012566347.1

MSRETNLSFVENILKHKHKKDKCLIIHESNKKNIEVEHFERNLSLWLINPTNLSFSINDYSKQRISPDGRLLDKL  
NEKQDHLGRKHRRVRTAFTHHQLTTLERTFETSHYPDVVLRERLASFTGLAESRIQVWFKNRRAKYRKHQLYDS  
STTDLNDTAYFTDNKKSHKKENISRTAKPKHIIHLYSEKTTSLPNLPGYNNLTNLKSVIKSPTIYGTLSIF

>DENV\_011065\_XP\_002164986.2

MLTNDKPASSQASNLKKTESPVQARVKQDVENKEDTSGYTAGVDNRIRRQRTHTFTVTQLHRLETCFARNRYPDM  
AMREDIAQWCSLTERVRIWFKNRRAKWRKKERHLERPDICNFAPTYRFESPSPYERRPTFTTYSSNVSQPTLP  
ICSSLNRRSSHASLGHYYSHNTHWYPSDHPVHSLSQRNSPNSPAGWYGINYNEPVRGYSTCPQSSSSTLNREDE  
MMSPIFSQRTHTFSPGDHSYQHSI

>DENV\_022238\_XP\_012562202.1

MSRETNLSFVENILKHKHKKDKCLIIHESNKKNIEVEHFERNLSLWLINPTNLSFSINDYSKQRISPDGRLLDKL  
NEKQDHLGRKHRRVRTAFTHHQLTTLERTFETSHYPDVVLRERLASFTGLAESRIQVWFKNRRAKYRKHQLYDS  
STTDLNDTAYFTDNKKSHKKENISRTAKPKHIIHLYSEKTTSLPNLPGYNNLTNLKSVIKSPTIYGTLSIF

>DENV\_024188\_XP\_012566844.1

MHSASVAIMDSKRKKLSTFSVKDILGLDEADTRKETKNNYEEDINEQGKKTRQCFSTTQVEQLEKLFNEINYPDA  
YTRQMLAKMKVSETRIQIWCQNRRRAKIRRQRKLHQPLIPQSTDIHNINKFQNFPPWHHYLQQTYLPPFHHNTELC  
KSCSSDLPLYERRPELLFRNFGTNTFTGHKKYFH

>DENV\_026119\_XP\_002164410.3

MSELCSSNHIDFSGNYIPSYFEETISPSSLLSDFLKELDSTNQLSNREHSHTNFSTLGKSTFNTSKKATKKTKN  
KTIDVANSNATNSCIIVNNVTNSSINFKNCSVFNATKSNCSKTVNSILSSVSSNGHSSNVNLI FGSTSNNTN  
EKLLIEEGSKDNEKMKNKDDNSVFNKNSFGDSNEEENEENDHSHKQKRHRTRFTQTQLNELERYFNKTHYPIF  
VREELAMRIDLTESRVQVWFQNRRAKWKRRKSVNMFNNTSNVFSYLSHSLTENNQLEQPYENDRTWPSQSPH  
FQIDSPDDRQHVHFHQQDVNGFTYNQLSSNYGTERNISYMLPQYYIGDNMTSMFNTPEQSNIILEPNFTNCIGID  
RFDRSVDRLCRKEDDQKLLYLRLQNLF

>DENV\_027852\_XP\_004207550.1

MRGFTIDEILRSSNDIESKTPGVFYHVERTEASNELKFCRESPNSFCSLSSIEMEEDKCGRRPRTSITLCQRDFL  
ECEFOKERYPTLLYINKLSSKINLSQYVIKVVWFQNRRAKYRKEGHKRKPTINIDYDTSKVNRISSNVCVRKLRQ  
NFSASNSKILRRHSTSYDLYGPRSLKCDVWFQKDRKCCSSAADKSKCCYFPT

>DENV\_043831\_XP\_002165604.2

MPYQWLTCLLGRNGTFFEKKFEMSSFLMENILKEEFNTKKFSLKNLQQNQPRLEFQCISHNTSPEFKTKTQERYE  
RNILLDEYSCFSSCHLCYQQLNSDPFKLSSKISSELRRQSSQDYPDRNYMERSCFYCPTQHFILNNTNLNTDKP  
FKKNSYSSHFLKRRHRTIFSDEQLNVLERLRFNKTHYPDVIVREEIAGIINLTEEKVEVWFKNRRARWRKQKDL  
GIY

>DEN\_079506\_XP\_002157088.1

MTMSDSPLDSPNMNSGAIKSETPPKRRRERTTFTKAQLDVLDMFGKTMYPDVFMREEVAKKINLAEARVQVWF  
KNRRAKFRRSRENPRHFDNKNYLGREKLMPEDLIRTFPKSSGGTTPHSYPNTSNYPPLWKYPGADHSPPYAGNNI  
IEEPVYRQSNPYAPISPYEYNFPGSRPPYFTQPPYYSAPSQDYLSNSVSAPSSTNSISSLSFSQHDTKNELNL  
PASYWSGAGYMGANM

>DENV\_110060\_XP\_002163599.1

MRKMPRLSPDNKDFSDSANEEDSFKQRSFKVKNLSESEDES DGCLKQKRHRTRFNPSQLNELERYFNKTHYPIF  
VREELALRIGLTESRVQVWFQNRRAKWKRRKKSFGSVQNCLELFPYARSTTPYNIPTLEQVWSPDLEEVQINQS  
NYSDTQCYINKNNSLNTVLNELYHETRYAGRHDLDGWSQLRNTFNDVAVPENNYIFR

>DENV\_130791\_XP\_012554469.1

MARNYSSEFSNMGWSSPYNGVPSYSSMPSGFPYHTNVNMHYPLAPSCGFPKRRRERTTFTKSQLLEILEELFLKT  
HYPDIFMREEAARKINLPESRVQVWFKNRRAKHRQKAKQDKTQKKTNSNISSENSDIKPDTPAPSLSPKTSVPS  
PESPCYKSNNNASTSSTSPINSIWRPAKSTSLYDNTHSRNYPTSPILSPCANNVVPYNPPSYLSQQPYIRSTHH  
YPSYVNINSNGPAGSEHSSHSSNGIIDFPPHYQNMHSSTPWGYATM

>DENV\_177203

MFTWDEKISPKCCNDHTIVEDDYAMCRSKQRRNRRTTFSKQQLMELELTFQKKHYPDINTREALAEQIGITEARI  
QVWFQNRRAKWRKLSTTKQRQLQREANNRYSSIDTWLEELKSRKHDISKELLTVKRESPPVNDXKKVLEHLLS  
IQDRDLPNKSEFATFTNSRTCTLLLRHLTQAISHVHVRVM

>DENV\_189615\_XP\_002160816.1

MIKKQNFQTVIQVHNSISLGVHNVDAKHGSLNSEEYQNRQFSNGKRRQRRYRTTFTQFQDELERAQFDKTHYP  
DVMREELAVRVHLTEARVQVWFQNRRAKWRKREKLSYNVHQQHGSGEVSSPYHISTSPKIQSQQRPVSSQMP  
TPLSHHTAFQPAQSPYCPQSTSPYPQYPHYQQSSMIGNYARPSYQYMSHHTGSVISSTPENLSPQDSQFTGHS  
SFNNLKGQNLIFA

>DENV\_191873

MTLLGMLPSSQEENSNFSDFKI KREEYQNRFSNGKRKQRRYRTTFTQFQDELERAFDKTHYPDVFMRREELAV  
RVHLTEARVQVWFQNRRAKWRKREKLSYNVHQOQHGSGNGEVSSPYHISTSPKIQSQRRPVSSQMPTPLSHHTAFQ  
PWAQSPYCPQSTSPYPQYPHYQQSSMIGNYARPSSYQYMSHHTGSVISSTPENLSPQDSQFTGHSSFNNLKGQNO  
LIFA

>ISX\_HU

MCAEVGPALCRGMERNLGCCEAPKKLSLSFSIEAILKRPARRSDMDRPEGPGGEEGPGEEAAASGSGLKPPKDPQ  
QEGRKSKRRVRTTFTTEQLHELEKIFHFTHYPDVHIRSQLAARINLPEARVQIWFQNRRAKWRKQEKIGNLGAPQ  
QLSEASVALPTNLDVAGPTWTSTALRRLAPPTSCCPSAQDQLASAWFPAWITLLPAHPWETQVPVGLPIHQTCIP  
VLCILPPPHPKWSICATST

>ISX\_MO

MAGPTIHRDMEKSSGYCEAPENLGLSFSIEAILKRPARRSDMDRPEGPGGEEGPGEEAAASGSGLKPPKDPQ  
KNKRRVRTTFTTEQLQELEKLFHFTHYPDIHVRSQLASRINLPEARVQIWFQNRRAKWRKQEKSGNLSAPQQPGE  
AGLALPSNMDVSGPVLTPAMTTLVPPTECCLLSQTQLPSSWFPTQIPLVPWHPWDLQPLPGPLTQHPCVPTFMF  
PPLHPKWSICATST

>MIXL1\_DA

MAVVHGNLGNHGLKQFQFLFPNADMERRTGMHTSDYALQDRMKFLDGASRADNVSLFTHRRKRTNFTQQQIDVLEK  
VYLDTKYPDIYLREKLEALTGLPESRIQVWFQNRRAKSRQVGISIPHKTSIGNILTPNNLLMHQFTTHQNHSGLE  
NLQRTSTFTADSFHQQLINSSEEKISTIKGDIYDPTTTPCMFSRTQENPIKTDHLSVVVPRSYTQQYPKEHEQFT  
HSANHAKSTMKQFLVEYDNFPNKTIGPEMKVVIPLPLSQSNFMMSSSSPKHIACSVQNMVSVQTPPELAFATFSPI  
RASEAVEFSDSDSDWERDAMSGFNGFI

>MIXL1\_HU

MATAESRALQFAEGAAFPAYRAPHAGGALLPPSPAAAALLPAPPAGPGPATFAGFLGRDPGPAPPPASLGSPAP  
PKGAAAPSASQRRKRTSFSAEQLQLELVFRRTYPIHLRERLAALTLLEPESRIQVWFQNRRAKSRQSGKSFQ  
PLARPEIILNHCAPGTETKCLKPQLPLEVDVNCLEPEPNGVGGGIDSSSSQGNFETCSPLSEDIGSKLDSWEEHI  
FSAFGNF

>MIXL1\_MO

MAAGSQQLQFAEGAAFPFPAAHGGQLLPAMRPASGLPAAPHDSRAPAATQCFPNRDSPTAQTTPAGLDPPGP  
SKGSAAPSAPQRRKRTSFSSEQLQLELVFRQTMYPDIHLRERLAALTLLEPESRIQVWFQNRRAKSRQSGKSFQ  
PLSSRRGVFLHCPAPGTEARCLKPQLPLEADVNHVPDPSMTGGGVCTSGSQSFEYSSLSLEDIGSKLDSWEEHIF  
SALGNF

>MXTX1\_DA

MWKDSTIDATAKTSGSGAVSRASRRKRTSFSKEHVELLRATFETDPYPGISLRESLSQTGLPESRIQVWFQNR  
RARTLKCKGGKPLWQTDLPAYNNMQTSPMQIHRKNNESSGATGTLCSPPPAYPDRIKEEMEKDAVCGCDTPSSM  
SISDDSGYCTPSYHQSRAIQSHMSPSPLLSPEHQMPNNGVRYGRRSPMSSMWSPHYLEAYACNPGFFYSHSEKH  
NTLQPLTPVTPDSCWEAGLDRTPVDNPDVPRTEGQLESVHGHPLPELPTLSLQEIILGELQGDWWQGEGLNNH  
STEDNHVYG

>MXTX2\_DA

MKDMWTDICIAQDGNSSQASKIAGRRKRTSFTKEHLELLKMAFNVDYPYGISVRESLSQATGLPESRIQVWFQNKRA  
RTLKNRAIQSSPQLDNKSPLPSPFLPPHMASVGVSAQQRGIQESPFNIQMSQTSQHFHTFPPSDYSTPVVKPRQT  
RLMGTSSCSPSDLQATPDSWSYAGSTQISPESWDVAENFGNSYKDESPFFLYPPPPYPYGSTRVGCPSMESLS  
TSPASSDSAFWDMGLENCSPVPTYSCGSPWDRLTEEQPVAPLPDLSSQCLEDLGEMEPAWWSFNGQMDL

>NOBOX\_HU

MALLLTLTSPDLEGTWDRDKDGFKAQEGPPLAVPEFPVCGLYRIYGVCGSFSFFIIRCSLCALETLSKSPQHDP  
LEIPEQSLKLIPLVSGKRELTRGQKAGEKPLAAGPGEELLRGSAPHAQDTQSEELPPSCTISGEKPPAVSGEA  
TGADAGRLCPPPRSAPHKDRTLARSRPQTQGEDCSLPVGEVKIGKRSYSPAPGKQKPNAMGLAPTSSPGAPNS  
ARATHNPVPCGSGRGPCHLANLLSTLAQSNQNRDHKQGPPEVTCQIRKKTRTLYRSDQLEELEKIFQEDHYPDS

KRREIAQTVGVTPQRIMVKGAGSLVAGWSGGGPTIETLELQSERSAVAWVWFQNRRAKWRKMEKLNKESKDNPA  
APGPASSQCSSAAEILPAVPMPEPKPDPFFPQESPLDTFFPEPMLLTSDQTLAPTQPSEGAQRVVTPLPFSPPPVR  
ADLFFPLPGPVHTPQLMPLLMVAGSDSSHKDGP CGSWGTSITLPPPCSYLEEELPQDYQQSNQPGPFQFSQAPQP  
PLFQSPQPKLPYLPTFFFSMPSSLTLPPPEDSLFMFPCGPGSGGTSQGYCPGASSGQILMQPPAGNIGTASWSDPC  
LPELFFPGFPCQALGHPPGGDGYFPDLFPTPCQALGRQPSSALSWMPEGARPGTGPLLSKAKEEPPAASLDQP  
SALEEARGDDKNSHVP

>NOBOX\_MO

MEPTEKLCCKMQGQEAQDKPRTAALTEGPLEQDSALPIQDDQDKQSSLPASLGRPLSKTSEELMDAGTCRVHK  
APTAAACGPQSEEEGCSPPERKAESLKPSISAVPGQATAGSLNSHEGLKESLEVTCQFRKKTRTLYRSDQLEE  
LERIFQEDHYPDSDKRHEISQMVGVTTPQRIMVWFQNRRAKWRKVEKLNKETHKNGPAAPSADSSQHRSAPELLDP  
MPTDLEPGVPVENILDVFFPEPMLLTSQTLTPFQNNEGAERVAVTPPLLSPPPIRRANLPLPLGPVQTPQVLP  
PMRDVPGSDSIYKDKAYVSWGTSIASPPTYSNLEDLGSQDYQASSQLGSFQLSQAPHLPLFPSLQSQFPYLPFP  
YPIPSSMPFLPPEDSLFSFFFGFSGDSSQDYCPGPPPGQILLQPPAENMGTGPWSGHCLPEPPFPHPHYQALGQ  
PLGAEGYFPNLLPTPYALTMSKQSSSLGLNGLLEGTRVETGSSLSKMSDEQTSSSLEQPALEEVDRDNKNNSHAAGA  
KE

>oc\_DR

MAAGFLKSGDLGPHPHSYGGPHPHSVPHGPLPPGMPMPSLGFGLPHGLEAVGFSQGMWGVNTRKQRRERTTFT  
RAQLDVLEALFGKTRYPDIFMREEVALKINLPESRVQVWFQNRRAKCRQQLQQQQQSNLSLSSKNASGGGSGNSC  
SSSSANSRNSNNNGSSSNNTQSSGGNNSNKSSQKQNSQSSQGGGSSGGNNSNNNSAAAAAASAAAAVAAAQS  
IKTHSSFLSAAAAASGGTNQSANNNNSNNNNQGNSTPNSSSSGGGGGQAGGHLASAAAAAALNVTAAHQNSSP  
LLPTPATSVPVSVIVCKKEHLSGGYGSVGGGGGGGASSGGLNLGVGVGVGVGVGVQDILLRSPYDQLKDAG  
GDIAGVHHHHSIYGAAGSNPRLLQPGGNIPTMDSSSSITTPSPPTPMSPOAAAAAHAAQSAQSAHHSAAHS  
AAYMSNHDSYNFHWNYQYQYPNNYAQAPSYYSQMEYFNSQNVNVMGHSGYTASNFLGLSPSPSFTGTVSAQAFS  
QNSLDYMSPODKYANMV

>OdsH\_DR

MQVSGWSSVLNLSMDAPNPEISPNSVTNSSSVYMIQMALIQQARVAAAAVAMQQQQQQQQQQQRDLNRELGMDF  
HSEQRIKLDVSPHNIHAGSSRGIKQDPLSDEGADSNLQNDCTESSKRRGRTNFNSWQLRELERVFQGSYHP  
DIFMREALATKLDLMEGRIAVWFQNRRAKWRKQEHKKGPRPAHNAHPQSCSGDPIPLSELRARELAQRSKRMK  
KAIDRQAKKLQDKGLEVDYARLEAEYLAVHQENGVDENNWLDDDGYYDDLHIDVVGVEPEYVTGDSLHDFCSRT  
YQTKSTSELDSNDMGLQGRVETPPPPQPPMQNKTLNYPFSIESLLGS

>OTP\_DR

MQQQDQKRHRTRFTPAQLNELERCFSKTHYPDIFMREEIAMRIGLTERVQVWFQNRRAKWKRRKKTNNVFRTPG  
ALLPSHGLPPFGANITNIAMGDGLCGTGMFGGDRWSVGVNPMTAGFGQLNQSSPLSSSLNSGLNSGINMGSALGA  
GSYQHYGLNALGDSMMYQHSVGGVSCGPGSPSATTPPNMNSC SVTPPPLSAQPNSSQNELNGEPMPLHQQQQQ  
QTHQHQQQQTHQHHPMAPPTPTQQQQQLPQSMQSPSDGANDTLHSIAALRRRASELNAIPSYLQMAPHNYEHYNS  
NSNSVY

>OTP\_HU

MLSHADLLDARLGMKDAAELLGHREAVKCRGLGVGGSDPGGHPGDLAPNSDPVEGATLLPGEDITTVGSTPASLAV  
SAKDPDKQPGPQGGPNPSQAGQQQGGQKQKRHRTRFTPAQLNELERSFAKTHYPDIFMREELALRIGLTERVQV  
WFQNRRAKWKRRKKTNNVFRAPGTLPTPGLPQFPASAAAAAAAAMGDSLCSFHANDTRWAAAAMPGVSQLPLPPA  
LGRQQAMAQSLSQSLAAGPPPNSMGLSNLAGSNGAGLQSHLYQPAFFGMVPASLPGPSNVSGSPQLCSPDSS  
DVWRGTSIASLRKALEHTVMSFT

>OTP\_MO

MLSHADLLDARLGMKDAAELLGHREAVKCRGLGVGGSDPGGHPGDLAPNSDPVEGATLLPGEDITTVGSTPASLAV  
SAKDPDKQPGPQGGPNPSQAGQQQGGQKQKRHRTRFTPAQLNELERSFAKTHYPDIFMREELALRIGLTERVQV  
WFQNRRAKWKRRKKTNNVFRAPGTLPTPGLPQFPASAAAAAAAAMGDSLCSFHANDTRWAAAAMPGVSQLPLPPA  
LGRQQAMAQSLSQSLAAGPPPNSMGLSNLAGSNGAGLQSHLYQPAFFGMVPASLPGPSNVSGSPQLCSPDSS  
DVWRGTSIASLRKALEHTVMSFT

>OTPa\_DA

MLSHADLLDARLGELSTPNSGLQLYWMKDAAAELLGHREALKCRLGGGGTDPVHPGDLAPVSDAVEGATLLPGDD  
INSAGSNPPGVAVNSKDQEKQQQQQNPTQSSSQSQKQKRHRTRFTPAQLNELERSFAKTHYPDIFMREELALR  
IGLTERSVQVWFQNRRAKWKKRKKT'TNVFRAPGTLPLTHHGLPQFPSAAAAAAMGDSLCSFHANDTRWAAAGMP  
GVSQQLQPPALGRQQAMAQSLSQSLGAGPPPNSMSLSNMSNGSGLQSHLYQPTFFPGMVPASLSGPTNVTGSPQ  
LCSSPDTDVWRGTSIASLRRKALEHTVMSMSFT

>OTPb\_DA

MLSHADLLDTRLGMKDAAAELLVHREALKCRLGGTDSGHPGDLTSATETVEGTLLPGEEISNGGSNPNGMQQVN  
AKDQEKQQQQNSNQTGGQQNQKQKRHRTRFTPAQLNELERSFAKTHYPDIFMREELALRIGLTERSVQVWFQNR  
RAKWKKRKKT'TNVFRAPGTLPLTHHGLPQFPSAAAAAAMGDSLCSFHANDTRWAAAGMPGVSQQLQIPPSLGRQQAMA  
QSLSQSLGAGPPPNNMGLSGSLSSNGSGLQSHLYQPTFFPGMVPASLSGPTNVTGSPQLCSSPDSMWRGTSIAS  
LRRKALEHTVMSMSFT

>OTX1\_HU

MMSYLKQPPYGMNGLGLAGPAMDLLHPSVGYPATPRKQRRERTT'FTRSQLDVLEALFAKTRYPDI FMREEVALKI  
NLPESRVQVWFKNRRRAKCRQQQSGSGTKSRPAKKKSSPVRESSGSESSGQFTPPAVSSSASSSSSASSSANPA  
AAAAAGLGGNPVAAASSLSTPAASSIWPASISPGSAPASVSVPEPLAAPSNTSCMQRSVAAGAATAAASYPMSY  
GQGGSYGQGYPTPSSSYFGGVDCSSYLAPMHSHHHPHQLSPMAPSSMAGHHHHHPHAAHPLSQSSGHHHHHHHHH  
HQGYGGSGLAFNSADCLDYKEPAAAAASSAWKLNFNSPDCLDYKDQASWRFQVL

>OTX1\_MO

MMSYLKQPPYGMNGLGLAGPAMDLLHPSVGYPATPRKQRRERTT'FTRSQLDVLEALFAKTRYPDI FMREEVALKI  
NLPESRVQVWFKNRRRAKCRQQQSGNGTKTRPVKKKSSPVRESSGSESSGQFTPPAVSSSASSSSSASSANPA  
AAAAAGLGGNPVAAASSLSTPTASSIWPASISPGSAPTSVSVPEPLAAPSNASCMQRSVAAGAATAAASYPMSY  
GQGGSYGQGYPPASSSYFGGVDCSSYLAPMHSHHHPHQLSPMAPSSMAGHHHHHPHAAHPLSQSSGHHHHHHHHH  
HHQGYGGSGLAFNSADCLDYKEPAAAAASSAWKLNFNSPDCLDYKDQASWRFQVL

>OTX1a\_DA

MMSYLKQAPYAMNGLGLGGATMDLLHPSVGYPTNPRKQRRERTT'FTRTQLDILESLFAKTRYPDI FMREEVALKI  
NLPESRVQVWFKNRRRAKCRQQQQSSSTNSKIRPAKKKSPSPRESFGSESSGHFTPPAVSSSSSSSSSSGNPSA  
LSGVGLISSSSSGTPVPSIWPAPVSPVPAPPSLPDISPPASASCMQRAMSSGGGTGVPSPMPYNQAPSAYAQ  
YPTSNAASYFGGMDCGSYLAPMTGHAHHHPHAAHHSQLSTAAAVSGHHHPHHIGQSSGHHHPHHQGYGGTALPFSS  
DCLDYKEQVASSWKLNFSSAAADCLDYKDQAARWFQVL

>OTX1b\_DA

MMSYLKQPPYAMNGLGLSGAAMDLLHPSVGYPATPRKQRRERTT'FTRSQLDILEALFAKTRYPDI FMREEVALKI  
NLPESRVQVWFKNRRRAKCRQQQQSGSSTKTRPAKKKSSPTRESTGSESSGQFTPPAVSSAGSSSSSSSTNNTGI  
CSTSTISISTVSSIWSPASISPGSAPPSVSLPEPVAPSNTSCMQRSVSGTASSTYPMPYNQTTGYSQGYPTPSGSYF  
SGVDCGSYLAPMHSHHHPHQLSPMTASSMPTHPHHHISQSSGHHHHHHHQAYSQGTGLAFNSDCLDYKEQTASSW  
KLNFNNTDCLDYKDQASWRFQVL

>OTX2\_DA

MMSYLKQPPYTVNGLSLTTSMDLLHPSVGYPATPRKQRRERTT'FTRAQLDVLEALFAKTRYPDI FMREEVALKI  
NLPESRVQVWFKNRRRAKCRQQQQQQNGQNKVRPAKKKSSPAREASSESGASGQFTPPSSTSVPAISTTTAPVS  
IWPASISPLSDPLSTSSSCMQRSYPMTYTQASGYSQGYAGSTSYFGGMDCGSYLTPMHHLTGPGSTLSPMSSN  
AVTSHLNQSPASLPTQGYGASGLGFNSTADCLDYKDQASSWKLNFNADCLDYKDQTSWKFQVL

>OTX2\_HU

MMSYLKQPPYAVNGLSLTTSMDLLHPSVGYPATPRKQRRERTT'FTRAQLDVLEALFAKTRYPDI FMREEVALKI  
NLPESRVQVWFKNRRRAKCRQQQQQQNGQNKVRPAKKKTSPPAREVSSSESGTSGQFTPPSSTSVPTIASSAPVS  
IWPASISPLSDPLSTSSSCMQRSYPMTYTQASGYSQGYAGSTSYFGGMDCGSYLTPMHHLTGPGSTLSPMGTN  
AVTSHLNQSPASLSTQGYGASSLGFNSTDCLDYKDQATASWKLNFNADCLDYKDQTSWKFQVL



>OTX2\_MO

MMSYLKQPPYAVNGLSLTTS GMDLLHPSVGY PATPRKQRRERTTFTRAQLDVLEALFAKTRYPDI FMREEVALKI  
NLPESRVQVWFKNRRRAKCRQQQQQQNGGQNKVRPAKKKSSPAREVSSSESGTSGQFTPPSSSTSVP TIASSSAPVS  
IWSPASISPLSDPLSTSSSCMQRSYPMY TQASGYSQGYAGSTSYFGGMDCGSYLTPMHHLPGPGATLSPMGTN  
AVTSHLNQSPASLSTQGYGASSLGFNSTTDCLDYKDQTASWKLNFNADCLDYKDQTSWK FQVL

>OTX5\_DA

MMSYMKQPHYSVNGLTLSGTGMDLLHSAVGY PNTPRKQRRERTTFTRAQLDVLEALFSKTRYPDI FMREEVALKI  
NLPESRVQVWFKNRRRAKCRQQQQQQTSGQTKPRPPKKKSSPARDSSASEPSASTSGPYSPPPPPGTAITPSSSS  
ATVSIWSPASISPLPDPLSAPSTACLQRSSYPMTYSQAPAYGQSYAASSSYFTGLDCSSYLSPMHPQLSASGGAL  
SPMSGALSQSPASLSSQGYTAASLGF GAVDCLDYKDQTSAWKLNFNAPDCLDYKDQNSWK FQVL

>PAX3\_HU

MTTLAGAVPRMMRPGPGQNYPRSGFPLEVSTPLGQGRVNQLGGVF INGRPLPNHIRHKIVEMAHHGIRPCVISRQ  
LRVSHGCVSKILCRYQETGSIRPGAIGGSKPKQV TTPDVEKKIEEYKRENPGMFSWEIRDKLLKDAVCDRNTVPS  
VSSISRILRSKFGKGEEEEEADLERKEAESEKKAKHSIDGILSERASAPQSDEGSDIDSEPDLP LKRKQRRSRTT  
FTAEQLEELERAFER THYPDIYTREELAQRAKL TEARVQVWFSNRRARWRKQAGANQLMAFNHLI PGGFPPTAMP  
TLPTYQLSETSYQPTSIPQAVSDPSSTVHRPQPLPPSTVHQSTIPSNPDSSSAYCLPSTRHGFSSY TDSFVPPSG  
PSNPMNPTIGNGLSPQVMGLLTNHGGVPHQPQTDYALSPLTGGLEPTTTVSASCSQR LDHMKSLDSLPTSQSYCP  
PTYSTTGYSMDPVTGYQYQYQYQSKPWTF

>PAX3\_MO

MTTLAGAVPRMMRPGPGQNYPRSGFPLEVSTPLGQGRVNQLGGVF INGRPLPNHIRHKIVEMAHHGIRPCVISRQ  
LRVSHGCVSKILCRYQETGSIRPGAIGGSKPKQV TTPDVEKKIEEYKRENPGMFSWEIRDKLLKDAVCDRNTVPS  
VSSISRILRSKFGKGEEEEEADLERKEAESEKKAKHSIDGILSERASAPQSDEGSDIDSEPDLP LKRKQRRSRTT  
FTAEQLEELERAFER THYPDIYTREELAQRAKL TEARVQVWFSNRRARWRKQAGANQLMAFNHLI PGGFPPTAMP  
TLPTYQLSETSYQPTSIPQAVSDPSSTVHRPQPLPPSTVHQSTIPSNADSSSAYCLPSTRHGFSSY TDSFVPPSG  
PSNPMNPTIGNGLSPQVMGLLTNHGGVPHQPQTDYALSPLTGGLEPTTTVSASCSQR LEHMKNVDSLPTSQPYCP  
PTYSTAGYSMDPVTGYQYQYQYQSKPWTF

>PAX3a\_DA

MTALAGGISRMMRPTPPQNYPRGGYSLEVSTPLGQGRVNQLGGVF INGRPLPNHIRHKIVEMAHHGIRPCVISRQ  
LRVSHGCVSKILCRYQETGSIRPGAIGGSKPKQSTTPDVEKKIEEYKRENPGMFSWEIRDKLLKDGICDRNNVPS  
VSSISRMLRCKFGGNGDEDEDDDEVEKREIEENERRAKHSIDGILGDRSSHSDGSDVDSE PGLPLKRKQRRSRT  
TFTAEQLEELERAFER THYPDIYTREELAQRAKL TEARVQVWFSNRRARWRKQAGANQLMAFNHLI PGGFPPTAMP  
SSLQPYQLADSPYPPSSISQVSEQPSTVHRPQPLPPTSVHQSGLGS GPAQEGSSAYCLSSGRHGFSGYS DGYVA  
APGHANPVNPSISNGLPSQVMGLLNPGAVPHQPQSDFALSPLTGGLEPSTGMPASCHSSQRLEALPGLPSMPALP  
SSQSYCPSSYSSPGYSVDHVASYQYSQYQSKVPFII

>PAX3b\_DA

MTAFPGTIPRMMRPSLSPNYPRSGFPMEVSTPMGQGRVNQLGGVF INGRPLPNHIRHKIVEMAHHGIRPCVISRQ  
LRVSHGCVSKILCRYQETGSIRPGAIGGTSKTTSPDVEKRV EYKRENPGIFSWEIRDKLLKEGICDRNNVPTV  
SSISRIMRGRSGTRADEEEEEDEEEDIERREREENAHRAHSIEGILADRSSPSDEGSEVESEPDLP LKRKQRRS  
RTTFTADQLEELERAFER THYPDIYTREELAQRAKL TEARVQVWFSNRRARWRKQAGANQLMAFNHLI PGGFSSH  
AMSSLSPYQLSESPYPPAALPQDSGTVHRPQPLPHSSHQSSGGAGPEGGASYCLSSRHGYTGYSDAFGPHNTHNN  
NAINNGLSSQVMGLITPSGASHPTQAEFSLDSGSSVSSSCSQRMESLSSLPALSNLNPQSYSSASFYSLEHSGH  
YQYSQYQONSFH YLRPEIA

>PAX4\_DA

MRKPPSNEISVYFSGEGSVNQLGGVFLNGRPLPVYKRRLMIELATEGMRPCEISRILKVSNGCVSKILGRFQRTG  
AIGPKAVGGSRPRLLTPEVISIIVQHQRQNPTLFAWEIRQKLATERACRGDQVPSVSSINRILKKIHQDEDIAYP  
NEKHYTEQLNVQSHFQQMNTNLPRTAHRSR TAFTADQSGRLEKEFTCGLYPDLLTREKLA EETNLSQDTIKKV  
WFSNRRARMRREKFEHNDCGIARPGFLGNCRNALISLSSSTAGCSLDDYRAHHAPS AFPLAAQRDRNTFPLAHLN  
SNAVSSCSFDQTESLMPMCHHGNEELAYRLVSPNIDERILLANGTQWMNHKTLTGQNI PMF



VSNGLSPQVMSILSNPSAVPPQPQADFSISPLHGGLDSASSISASCSQRADSIKPGDSLPTSQSYCPPTYSTTGY  
SVDPVAGYQYSQYGQTAVDYLAKNVSLSTQRRMKLGEHSAVLGLLPVETGQAY

>PAX7a\_DA

MATLPGTVPRMMPAPGQNYPRGTGFPLEVSTPLGQGRVNQLGGVFINGRPLPNHIRHKIVEMAHHGIRPCVISRQ  
LRVSHGCVSKILCRYQETGSIRPGAIGGSKPRQVATPDVEKRIEYKRENPGMFSWEIRDKLLKDGVCDRGTVP  
GEASSVSSISRVLRARFVGKKDDDDCEDKDEDGEKKTKHSIDGILGDKGNRTDEGSDVESEPDPLPKRKQRRSRT  
TFTAEOLEELEKAFERTHYPDIYTREELAQRKLTARVQVWFSNRRARWRKQAGANQLAAFNHLLPGGFPPPTGM  
PTLPTYQLPESTYPSTTSLQDGSSTLHRPQPLPPSSMHQGLSADSGSAYGLSSNRHTFSSYSETFMSPTASSNH  
MNPVSNGLSPQVMSILSNPSAVPSPQHDFSIISPLHGGLEASNPISASCSQRSDPIKSVDSLASTQSYCPPTYSA  
TSYSVDPVTAGYQYSQYGQSTYCTVPASHSLYRAAFL

>PHDP\_DR

MEFPLLKANKFNDKCLYTANSEFYNSGANGGGLSVANHINHYNLMIDSSYKLCANESAIRGSLNQESSLLFSKIT  
TVSEFYPATHNIGSYNTDFHLKSYGDDGLSLTDKSKQRRIRTTFTSNQLENELEKIFLETHYPDIYTREEIASKLH  
LTEARVQVWFQNRRAKFRKQERHAIYIMKDKSSKLDGRKNPVAGSKYLGPSTLKGPNQNGHGRQMKCLYDQI

>PHOX2a\_DA

MYKMDYSYLNNTYDSCMAAMEASAYADFNCSQSNGFQYNPISRSGFSSGPACAPLATASCTLGALREHQPAPYSTV  
PYKFFSDASGLNEKRKQRRIRTTFTSSQLKELERVFAETHYPDIYTREELALKIDLTEARVQVWFQNRRAKFRKQ  
ERAANSKASSSSGGKPSDARSSSEDESKESTCSPTPDSTANMSSPGARSSLSPPAPGPASTFSPASISPAK  
SSPWPSLGSPTPGPTHHTQELLKAWQPADSMSGPFAGVLSFHRKNNTIKSNLF

>PHOX2b\_DA

MYKMEYSYLNSSAYESCMAGMDTSSLASAYADFSSCSQASGFQYNPIRTTFGATSGCPSLTPGSCSLGTLRDHQS  
SPYAAVPYKLFTHGGLNEKRKQRRIRTTFTSAQLKELERVFAETHYPDIYTREELALKIDLTEARVQIKVWFQ  
RRAKFRKQERAAAAAAAKNGTGKKSDSREEDSKEAKATDPDSTGGPGPNPNPTSNCGGPSPTGGQVSATGN  
VEQVKT SVAGMGPTAPTQGWASAPGTITSIPDSLGGPFASVLSLQQRNGAKATLVKTSMF

>PHX2A\_HU

MDYSYLNYSYDSCVAAMEASAYGDFGACSQPGGFQYSPLRPAFPAAGPPCPALGSSNCALGALRDHQPAPYSAPY  
KFFPEPSGLHEKRKQRRIRTTFTSAQLKELERVFAETHYPDIYTREELALKIDLTEARVQVWFQNRRAKFRKQ  
AASAKGAAGAAGAKKGEARCSSEDDDSKESTCSPTPDSTASLPPPPAPGLASPRLSPLPVALGSGPGPGPQ  
PLK GALWAGVAGGGGGPGAGAAELLKAWQPAESGPGPFSGVLSFHRKPGPALKTNLF

>PHX2A\_MO

MDYSYLNYSYDSCVAAMEASAYGDFGACSQPGGFQYSPLRPAFPAAGPPCPALGSSNCALGALRDHQPAPYSAPY  
KFFPEPSGLHEKRKQRRIRTTFTSAQLKELERVFAETHYPDIYTREELALKIDLTEARVQVWFQNRRAKFRKQ  
AASAKGAAGATGAKKGEARCSSEDDDSKESTCSPTPDSTASLPPPPAPSLASPRLSPLPAALGSGPGPQPLK  
ALWAGVAGGGGGPGTGAAELLKAWQPAEPGPGPFSGVLSFHRKPGPALKTNLF

>PHX2B\_HU

MYKMEYSYLNSSAYESCMAGMDTSSLASAYADFSSCSQASGFQYNPIRTTFGATSGCPSLTPGSCSLGTLRDHQS  
SPYAAVPYKLFTHGGLNEKRKQRRIRTTFTSAQLKELERVFAETHYPDIYTREELALKIDLTEARVQVWFQNR  
AKFRKQERAAAAAAAKNGSSGKSDSSRDESKEAKSTDPDSTGGPGPNPNPTPCGANGGGGGGSPAGAPG  
AAGPGPGGEPGKGGAAAAAAGGLAAAGPGQGWAPGPGPITSIPDSLGGPFASVLSLQ  
PNGAKAALVKSSMF

>PHX2B\_MO

MYKMEYSYLNSSAYESCMAGMDTSSLASAYADFSSCSQASGFQYNPIRTTFGATSGCPSLTPGSCSLGTLRDHQS  
SPYAAVPYKLFTHGGLNEKRKQRRIRTTFTSAQLKELERVFAETHYPDIYTREELALKIDLTEARVQVWFQNR  
AKFRKQERAAAAAAAKNGSSGKSDSSRDESKEAKSTDPDSTGGPGPNPNPTPCGANGGGGGGSPAGAPG  
AAGPGPGGEPGKGGAAAAAAGGLAAAGPGQGWAPGPGPITSIPDSLGGPFASVLSLQ  
PNGAKAALVKSSMF

>PITX1\_DA

MNVDMASSFHLPRSASSTRETLENTSSESSESDTEAAEKERSVEQRSDDGNADDPKKKKQRRQORTHFTSQQLQELEA  
TFQRNRYPDMSTREEIAVWTNLTEARVRVWFKNRRAKWRKRERNQQMDLCKNSYLPQFSGMLQPYDDVYPTYTYN  
NWTNKGLTPAPLSTKNFTFFNSMSPLTSQSMFSAPSSISSMSMASGMGHSAPVPGMPTTGLNNIGNLNGIGGSTIN  
PAMSSSTCPYGPVSPYSVYRDTCNSSLATLRLKSKQHPSFGYSGLQSPGSSLNACQYNS

>PITX1\_HU

MDAFKGGMSLERLPEGLRPPPPPHDMGPAFHLARPADPREPLENSASESSDTELPEKERGGEKGPEDSGAGGT  
GCGGADDPAKKKKQRRQORTHFTSQQLQELEATFQRNRYPDMSMREEIAVWTNLTEPRVRVWFKNRRAKWRKRERN  
QQLDLCKGGYVVPQFSGLVQPYEDVYAAGYSYNNWAAKSLAPAPLSTKSFTFFNSMSPLSSQSMFSAPSSISSMTM  
PSSMGPGAVPGMPNSGLNNINNLTGSSLSNSAMSPGACPYGTPASPYSVYRDTCNSSLASLRLKSKQHSSFGYGG  
LQGPASGLNACQYNS

>PITX1\_MO

MDAFKGGMSLERLPEGLRPPPPPHDMGPFHLLARAADPREPLENSASESSDADLPDKERGGEAKGPEDGGAGSA  
GCGGGAEDPAKKKKQRRQORTHFTSQQLQELEATFQRNRYPDMSMREEIAVWTNLTEPRVRVWFKNRRAKWRKRER  
NQQLDLCKGGYVVPQFSGLVQPYEDVYAAGYSYNNWAAKSLAPAPLSTKSFTFFNSMSPLSSQSMFSAPSSISSMT  
MPSSMGPGAVPGMPNSGLNNINNLTGSSLSNSAMSPGACPYGTPASPYSVYRDTCNSSLASLRLKSKQHSSFGYGG  
LQGPASGLNACQYNS

>PITX2\_DA

MTSMKDPLSLDHHHHHHVHTGSKHAPLSMASSLQPLQRSVDSKHRLDVHTVSDTSSPESVEKEKQSKNEDSNDD  
PSKKKRQRRQORTHFTSQQLQELEATFQRNRYPDMSTREEIAVWTNLTEARVRVWFKNRRAKWRKRERNQQAE  
LCKNGFGPQFNGLMQPYDDMYPSYTYNNWAAKGLTSASLSTKSFPFFNSMNVNPLSSQTMFSPNSISSMSMSSMVP  
SAVTGVPGSSLSLNNLNNLSNPNSLNSGVPTPACPYAPPTPPYVYRDTCNSSLASLRLKAKQHSSFGYASVQNP  
SNLSACQYAVDRPV

>PITX2\_HU

METNCRKLVSAQVQLGVQPAAVECLFSKDSEIKKVEFTDSESRKEAASSKFFPRQHPGANEKDKSQQKNEVDG  
AEDPSKKKRQRRQORTHFTSQQLQELEATFQRNRYPDMSTREEIAVWTNLTEARVRVWFKNRRAKWRKRERNQQAE  
LCKNGFGPQFNGLMQPYDDMYPGYSYNNWAAKGLTSASLSTKSFPFFNSMNVNPLSSQSMFSPNSISSMSMSS  
MVPSAVTGVPGSSLSLNNLNNLSSPSLNSAVPTPACPYAPPTPPYVYRDTCNSSLASLRLKAKQHSSFGYASVQ  
NPASNLSACQYAVDRPV

>PITX2\_MO

METNCRKLVSAQVQLGVQPAAVECLFSKDSEIKKVEFTDSEPKSRKESASSKLFPRQHPGANEKDKSQQKNEVDG  
AEDPSKKKRQRRQORTHFTSQQLQELEATFQRNRYPDMSTREEIAVWTNLTEARVRVWFKNRRAKWRKRERNQQAE  
LCKNGFGPQFNGLMQPYDDMYPGYSYNNWAAKGLTSASLSTKSFPFFNSMNVNPLSSQSMFSPNSISSMSMSS  
MVPSAVTGVPGSSLSLNNLNNLSSPSLNSAVPTPACPYAPPTPPYVYRDTCNSSLASLRLKAKQHSSFGYASVQ  
NPASNLSACQYAVDRPV

>PITX3\_DA

MDFNLLTDSEARSPALSLSDSGTPQHDPGCKGQDNSDTEKSHQNHTDESNPEDGSLKKKQRRQORTHFTSQQLQEL  
EATFQRNRYPDMSTREEIAVWTNLTEARVRVWFKNRRAKWRKRERNQQAE LCKNGFGA QFNGLMQPYDDMYSGYS  
YNNWATKSLASSPLSAKSFPPFFNSMNVSPSSQPMFSPSSIPSMNMASSMVPSAVAGVPGSGLNNLGNLNNLNS  
PTLNSAAVSAACPYATTAGPYMYRDTCNSSLASLRLKAKQHANFAYPAVQNPVSNLSPCQYAVDRPV

>PITX3\_HU

MEFGLLSEAEARSPALSLS DAGTPHPQLPEHGCKQEHS DSEKASASLPGGSPEDGSLKKKQRRQORTHFTSQQLQ  
ELEATFQRNRYPDMSTREEIAVWTNLTEARVRVWFKNRRAKWRKRERSQAE LCKGSAAPLGGGLVPPYEEVYPG  
YSYGNWPPKALAPPLAAKTFFFAFNSVNVGPLASQPVFSPSSIAASMVPSAAAAAPGTVPGPGALQGLGGGPPGL  
APAAVSSGAVSCPYASAAAAAASSPYVYRDP CNSSLASLRLKAKQHASFYPAVHGPPPAANLSPCQYAVER  
PV

>PITX3\_MO

MEFGLLGEAEARSPALSLS DAGTPHPPLPEHGCKGQEHSDSEKASASLPGGSPEDGSLKKKQRRQRTHFTSQQLQ  
ELEATFQRNRY PDMSTREE IAVWTNLTEARVRVWFKNRRRAKWRKRERSQQAE LCKGGFAAPLGGLVPPYEEVYPG  
YSYGNWPPKALAPPLAAKTFFFAFNSVNVGPLASQPVFSPSS IAASMVPSAAAA PGTVPGPGALQGLGGAPPGL  
APAAVSSGAVS CPYASAAAAAASSPYVYRDP CNSSLASLRLKAKQHASF SYPAVPGPPPAANLS PCQYAVER  
PV

>Pph13\_DR

MDKGTMRKQRRYRTTFNTLQLQELERAFQORTHYPDVFFREELAVRIDLTEARVQVWFQNRRAKWRKQEKIGGLG  
GDYKEGALDLDVSYDDSAVLGQLDSALGGGTLPLPDTPPQSSNSLDNELKASYGTGAMSPSRLSPNIFLNLNIDH  
LGLERGGSGLSMEWSTYPPQTQAQTHPQMDSDNQLQQHPPQQHASDPIHAGSSSHHQQQQQHQEQHNPLHPG  
LEFAASLSLDMTDGSSAYDEMFKFLSADVDQFTIDSFKADCILSMEQSQMAYGGHSQLVGSSNELCLDGIGMSSF  
GMEEGEPKSPPSLLVLDKSLPSLSIGVEGIADLVEQLHHHQHEGGPVGGGVI TGDVM

>prd\_DR

MTVTAFAAAAMHRPFFNGYSTMQDMNSGQGRVNQLGGVFINGRPLPNNIRLKI VEMAADGIRPCVISRQLRVSHGC  
VSKILNRYQETGSIRPGVIGGSKPRIATPEIENRIEYKRSSPGMFSWEIREKLIREGVCDRSTAPSVSAISR LV  
RGRDAPLDNDMSSASGSPAGDGTKASSSCGSDVSGGHHNNGKPSDEDISDCESEPGIALKRKQRRCRTTFSASQL  
DELERAFERTQY PDIYTREELAQR TNL TEARIQVWFSNRRARLRKQHTSVSGGAPGGAAASVSHVAASSSLPSV  
SSVPSMAPLAMMPGSLDPATVYQQYDFY GSHANISVSAAAPMASSNLSPGITTTTPPHHQFY NPSANTASYIMP  
GENGNTTPTGNIIVSSYETQLGSVYGTETETHQTMPRNE SPNESVSSAFGQLPPTPNSLSAVVSGAGVTSSSGAN  
SGADPSQSLANASAGSEELSAALKVESVDLIAASQSQLYGGWSSMQALRP NAPLSPEDSLNSTSSTS QALDVTAH  
QMFPYQHTPQYASYPAPGHAHSHHGHPHAPHPHAPHPQYAGAHPHYPPSSSAHFMPQNFNAAAFPSPSKVNY  
TTMPPQPFYPSWY

>PROP1\_DA

MDIEKPOQQFPENYSEVTVSSADIDVQIHPKVSQKSESVRDGGARARPYPSPSRRRHRTTFSNEQLEHLELAF  
RQNHYPDIYYREELARVTKLNEARIQAWFQNRRAKQRKQDRITQKSLAVSMMPVRGPLFSTMCVSSSAMGRQCQC  
PHSLPHVPQFSPVLPFGGYPHPSSSGSQFSSPSGSLPSQANRQPN DWYNQLCNIGPSPTSVLSLASVPGLESTSH  
WN

>PROP1\_HU

MEAERRRQAEKPKKGRVGSNLLPERHPATGTPTTTTVDSSAPPCRRLPGAGGGRSRFSPQGGQRGRPHSRRRHRTT  
FSPVQLEQLES AFGRNQY PDIWARESLARDTGLSEARIQVWFQNRRAKQRKQERSLLQPLAHLSPA AFSSFLPES  
TACPYSYAAPPPVTCFPHPYSHALPSQPSTGGA FALSHQSEDWYPTLHPAPAGHLPCPPPPMPLSLEPSKSW  
N

>PROP1\_MO

MEAQRSSHQEKQTKGHACGRSLPEPRVASGTLISTVDRSSEAYRRLSGTELGRPKLCPQRGRPHSRRRHRTTFNP  
AQLEQLES AFGRNQY PDIWAREGLAQDTGLSEARIQVWFQNRRAKQRKQERSLLQPIAHLSTATFSGFLPESAY  
PYTYGTPPPPAPCFPHPYSHSLPSQPSTAASLALPPQPEDWYPTLHPAPTGHLP CPPPPMFPLSLET PKSWN

>PRRX1\_HU

MTSSYGHVLERQPALGGRLDSPGNLDTLQAKKNFSVSHLLDLEEAGDMVAAQADEN VGEAGRSLLES PGLTSGSD  
TPQQDNDQLNSEKKKRKQRRNR TTFNSQLQALERVFER THYPDAFVREDLARRVNLTEARVQVWFQNRRAKFR  
RNERAMLANKNASLLKSYSGDVTAVEQPIVPRPAPRPTDYLSWGTAS PYSAMATYSATCANN SPAQGINMANSIA  
NLRLKAKEYSLQRNQVPTVN

>PRRX1\_MO

MTSSYGHVLERQPALGGRLDSPGNLDTLQAKKNFSVSHLLDLEEAGDMVAAQADESVGEAGRSLLES PGLTSGSD  
TPQQDNDQLNSEKKKRKQRRNR TTFNSQLQALERVFER THYPDAFVREDLARRVNLTEARVQVWFQNRRAKFR  
RNERAMLANKNASLLKSYSGDVTAVEQPIVPRPAPRPTDYLSWGTAS PYSAMATYSATCANN SPAQGINMANSIA  
NLRLKAKEYSLQRNQVPTVN

>PRRX1a\_DA

MTSSYAHVMDRQATLPNRLETAITANQDHLQAKKNFSVSHLLDLEEAREMVGAAEESAGEAGRSMLESPLGTSG  
SDTTQQENEQLNAEEKKKQRRNRTTFNSSQLQALERVFERTHYPDAFVREDLARRVNLTEARVQVWFQNRRAK  
FRRNERAMLASKNASLLKSFSGEVTAVEQPIVPRPAPRPNDYLSWGSSPSYSAMATYSPSCANNTTAQGMNMANS  
IANLRLKAKEYSLNQNRSKREQLQGTKLS

>PRRX2\_HU

MDSAAAAFALDKPALGPGPPPPPPALGPGDCAQARKNFSVSHLLDLEEVAAAGRLAARPGARAEAREGAAREPSG  
GSSGSEAAPQDGECPSPGRGSAAKRKKKQRRNRTTFNSSQLQALERVFERTHYPDAFVREELARRVNLSEARVQV  
WFQNRRAKFRNRERAMLASRSASLLKSYSQEAIEQPVAPRPTALSPDYLSWTASSPYSTVPPYSPGSSGPATPG  
VNMANSIASLRLKAKEFSLHHSQVPTVN

>PRRX2\_MO

MDSAAAAFALDPPAPGPGPPPPAPGDCAQARKNFSVSHLLDLEEVAAAGRRAAGPVSGPAEARVGAAREPSGGSSG  
TEAAPQDGDPCSPGRGTRKKKQRRNRTTFNSSQLQALERVFERTHYPDAFVREELARRVNLSEARVQVWFQNR  
AKFRNRERAMLATRSASLLKSYGQEAIEQPVAPRPTTMSPDYLSWPASSPYSSVPPYSPGSSPATPGVNMANS  
IASLRLKAKEFSLHHSQVPTVN

>PTX1\_DR

MDRSSAVGGCGGGGLGVGVVTSSATALGPGGLTNGGGGVVSGALNGLEAMSAESTGLCLQDLVSAGTANGAGSA  
GSAESATTTSTALSSGSTGSSTVNGGSSSTSGTEHLHSHHSLHDSSSSVSI SPAISSLMPISSLSHLHHSAGQDL  
VGGYSQHPHHTVPPHTPKHEPLEKLR IWAETGDFRDSHSSMTAVANSLDSTHLNNTFQTSSTSSISNRSRDRKDG  
NRSVNETTIKTENISSSGHDEPMTTSGEEPKNDKKNKRQRRQRTHTFQTSQQLQELEHTFNRNRYPDMSTREEIAMW  
TNLTEARVRVWFKNRRAKWRKRERNAMNAAVAADFSGFGTQFMQPFADDSLYSSYPYNNWTKVPSPLGKPFPP  
WPNVPLGSMVAGNHQNSVNCFNFGASGVAVSMNNAASMLPGSMGSSLSNTSNVGAVGAPCPYTT PANPYMYRSAA  
EPCMSSSMSSSIATLRLKAKQHASAGFGSPYSAPS PVSRSNSAGLSACQYTG VGVTDV VVXENALGALLNQHQHHL  
QHFGSGSVGGSGVPNGMQQHSGNMLHHSNLGLDHS DLGLVGGGPNHQDEGNHSLEGSNKS PMEAPLANSNNNN  
NDNDEDDVID

>RAX2\_HU

MFLSPGEGPATEGGGLGPGEEAPKKKHRRNRTTFTTYQLHLQERAF EASHYPDVYSREELAAKVHLPEVRVQVWF  
QNRRAKWRRQERLESGGAVAAPRLPEAPALPFARPPAMSLPLEPWLGP GPPAVPGLPRLGPGGLQASFGPHA  
FAPTFADGFALEEASLRLLAKEHAQALDRAWPPA

>REPO\_DR

MEHDSFDDPIFGEFGGGLNPLGAKPLMPTTTAMHPVMLG SVHELCSQQQQQQQQRLPDCNTILPNAVGGGAGS  
GGAGGSPNYVTKLDFVNKMGCSYSPQKYEYI SAPQKLVEQQQQQQHHHQHYTATPPSHNGILLHKQSSQQQ  
QQQQQQLV GILDYHPLNGKLDYSSSPKDQYEPQLQHL YGGSPHHL DHDHSDGGLLQDSSPVMINGGSAGGKLK  
KPDEMCSQLEAGGAGVTPPSSSSTVVNGTTNGTGNANSSSSAGVGIQGAAGTAGVAAPAAKKGSSSKKGDPN  
GIKKKTRTTFTAYQLEELERAFERAPYPDVFAREELAIKLNLSERVQVWFQNRRAKWRKHEPPRKTGYIKTST  
PPTATLNPGLTAPPFTSYPTTTVTTPPGSMDSWTSYQTPYELTPQFSLSPAASPYGTYSQYGYVHESQLFPM  
RHYEYGSPTMEMGATTG SVAGNGDESVANGGSYQTAELQTAQQQLADGTLVTVHAAHQQQQQQQQLNGKYLSA  
EEAKYVHLQCHQSGGLELSPGASCHLVEAQGHYVTTATGGAASAGGTSDDNDSDGGMQTVIKSEEVSQQQQQ  
QQQSYVLPFFLH

>RX\_DR

MSGSGGVANSSTAAANNTAATFQHI FEQLVQQGGGNHKLPPKQLEQLRHLLGNVRDAKNLQMI VEKFKNLEQFH  
EHYAAHLANNNTVI STEDSNDLVKDNARKYGGGQTLTPRHTIDAILGLKNRNGAANGSGRNPETVSDGSVDP  
SLGDDDATDLRCGMLTLQLRSMDNHMASMLQQHAKNGGALPYGPPTPPGGQQPQV PNATPLHHGQQMGQAGHATHA  
GHGHPTHGHGAPFGYHNAFGFGQGGHGYGHPEEAAGNYLNSMHQMVEANQLQTGANANPPPAPLPPSSFGSHQQ  
HLAALAAQAQEQQNQHSKYAKSSPTGAGPPPPGAYFMESQTAPVAPSQIN YDERSMSSASDLEEDDDDAAKLQL  
DVTSPPTSPRGLA AKRKSAGVFCDDNEPKLANGQLPGNYGIRPRSMEEVHHQQQSHHHQQQQQQQQQQQLQ  
QQQGFQHDFRNSGNGNPNNGNSNSGDHGERLNADSDSLVNGSCASSEDLNQTNSSSEQEKITSGSDDEGQDDNCAK  
KKHRRNRTTFTTYQLHELERAF EKSHYPDVYSREELAMKVNLPEVRVQVWFQNRRAKWRRQEKSES LRLGLTHTFT

QLPHRLGCGASGLPVDPWLSPPLLSALPGFLSHPQTVYPSYLTTPPLSLAPGNLTMSSLAAMGHHHAHNGPPPPHV  
GHGGHGQPQPPPPPPPHGVPHPHGSHHVPLSHLSPHLSRMSPHATSLGSPHHGVTPLGTPLHSSLPPSSTATTV  
AVSSSQSSSSASLECSGPDVCMSPQNLISIGNADSNGDGRDLSSDLDAGSTSSNPGSSLDKCAASANIELLDVGR  
DSPPPPTPTGKGSSTPPTDMRSNSIATLRIKAKEHLNLNKGMVSI

>RX\_HU

MHLPGCAPAMADGSFSLAGHLLRSPGGSTSRHSIEAILGFTKDDGILGTFPAERGARGAKERDRRLGARPACK  
APEEGSESPPPPAPAPAPEYEAPRPYCPKEPGEARSPGLPVGPATGEAKLSEEEQPKKXRRNRRTFTTYQLHE  
LERAFEKSHYPDVYSREELAGKVNLPVVRVQVWFQNRRAKWRROEKLEVSSMKLQDSPLLSFSRSPSATLSPLG  
AGPGSGGGPAGGALPLESWLGPPLPGGATALQSLPGFGPPAQSLPASYPPIPPPPFLNSPPLGGLQPLAPP  
PSYPCGPGFGDKFPLDEADPRNSSIAALRLKAKEHIQAIGKPWQAL

>RX\_MO

MHLPGCAPAMADGSFSLAGHLLRSPGGSTSRHSIEAILGFTKEDGILDTPAERSRSSKERDPRLGAQPACPK  
APAGGSESSPPAAPGFVPEYEATRCPYKQGEARSPGLSVGPAAGDSKLEEEPPKKXRRNRRTFTTYQLHE  
LERAFEKSHYPDVYSREELAGKVNLPVVRVQVWFQNRRAKWRROEKLEVSSMKLQDSPLLSFSRSPSSALAPLG  
TGPGSGSGPPGALPLEPWLGPPLPGGATALQSLPGFGPPGQGLPASYPPIPPFLNSAPLGPGLQQLGPPPAYP  
CAPAFGDKFSLEEAYPRNSSIAALRLKAKEHIQAIGKPWQAL

>RX1\_DA

MHLSLDTMMVDDSCLSPSNFHDMVKAGGAVVGVTRVHSIDVILGFNKDQDSLLNPGDNAVVAHKVGGESLGEPEGKL  
DQRVQPYGHLPLLRDQSEQPTFHADAMFNSKCDGDLGDLRKAIESDSKSPDSADGEQPKKXRRNRRTFTTYQLH  
ELERAFEKSHYPDVYSREELAMKVNLPVVRVQVWFQNRRAKWRROEKIDASTMKLHDSPLSFRNRPMSHPTVGM  
NNSLPLDPWLSPPLSSATPVHSIPGFMGPTQGLQTYPGHSFLSPQPMASQMPAPPYQCPPPFTDKYPLED  
VDQRSSIAALRMKAKEHIQSMCKTWQPMC

>RX2\_DA

MHLSLDTMMVDDGCLSTESYHDLGKGGVSGISSRVHSIDVILGFNSKDQDPLLEPIGTHKVEDQLEEQEKQVNS  
DPYSHLQIPDQTOQQQSVYHDTGLFSTDKCADLGDPRSNVESDSRSPDIPDEDQPKKXRRNRRTFTTYQLHEL  
ERAFEKSHYPDVYSREELAMKVNLPVVRVQVWFQNRRAKWRROEKMDTGMTKLHDSPIRSFRNPPMAPNVGPMNS  
SLPLDPWLSSPLSSATPMHSIPGFMGPGQSLQPTYTAHPGFLNTSPGMMQNMQMPPPPYQCQPVFNDKYPLEDV  
DRSSIAALRMKAKEHIQSMCKTWQPM

>RX3\_DA

MRLVGSQYKDMEDRLSPSARLVRSPGSQTRHSIESILGFKGETLFHPAFYPYSGKTKGKDEHLSPKKDSNKHFD  
GVCIRSTVMVSPDLDPADGGKLSDDENPKKXRRNRRTFTTFQLHELERAFEKSHYPDVYSREELALKVNLPVVRV  
QVWFQNRRAKWRROEKLEVSSIKLQESSMLSIPRSGPLSLGSGPLPLEPWLTPGISTSSSPLQSLPSFITPQAVP  
ASYTPPQFLSSSTLNHSLPHIGAVCPPYQCSGFMDFKSLEEADPRNTSIALRMKAKEHIQSIGKTW

>SEBOX\_DA

MALFYDQSFDLGLVQKINMETESDFIFNTNMLQFTDVTTKHMLSSPELDRTGHEGQRKRRTIFSRALSELER  
AFMITPYPDITLRRERLAALTLPESKIQVWFQNRRAKWRROEKMDTGMTKLHDSPIRSFRNPPMAPNVGPMNS  
KSLRHHQQLIRQALNPWFQNRPPISPDLPEILQWANRNETPGDSSSFSSCPSERIQHPPFNQSSSVWQMNCFAA  
HPEGLKSYCTTSQALYSSVSVDQMI PAHPSSLEEALQRQALHTHPQTSGLDISDLIYKAAVVTNLEEC

>SEBOX\_HU

MGGSGVGTAWHGPLARPSGTLFPASSMPSVDASSADGGSGLGSHRRKRTTFSKGQLELERAFAAWYPYNI  
EHLAVVTCLEAKVQVWFQKRWAKIKNRKSGLSPGSECPQSSCSLPDTPQPPWDPQMPGQPPSSGTPQRTSV  
CRHSSCPAPGLSPRQGWEGAKAVAPWGSAGASEVHPSLERATPQTSLSGLSDLIYALAIVVNVVHDS

>SEBOX\_MO

MASPVEASPGCASGLGPHRRKRTTFSVQGLVELERVFARPYPDISTREHLAQVTHLPEAKIQVWFQNRRAKRIK  
DRKPGALNSRLELPPNSCSLPDTPQLPWDPGTSSHPHPTSSAQYTSACPPQTSCLGPILGPGQSWGAKVAAPW  
GTSGASGIHSSLEQIVPQTSGLNLSDLIYTSIAIVTNVDHF

>SHOX\_DA

MEELTAFVSKSFDQKTKESSKESITYREVLESGLARARELGNSETNLQEI TETNNNHC PVHLYKEHVELEKEKLLK  
EFSVTRASDGIYDCKDKKEDVKSEDEDAQSKLKQRRSRTNFTLEQLNELERLFDETHYPDAFMREELSQRLLGLSE  
ARVQVWFQNRRAKCRKQENQMHKG VILGTASHLDACRVAPYVNMGALRMPFQQVQAQLQLEGVGTSHPHLHPHL  
AAHAPYLMFPPPPFGLPIASLADSASAAAAVVAAAKSNSKNSS IADLRLKARKHAEALGL

>SHOX\_HU

MEELTAFVSKSFDQKSKDGNNGGGGGGGKDSITYREVLESGLARSRELGTSDSSIQDITEGGGHCPVHLFKDHV  
DNDKEKLKEFGTARVAEGIYECKEKREDVKSEDEGQTKLKQRRSRTNFTLEQLNELERLFDETHYPDAFMREEL  
SQRLLGLSEARVQVWFQNRRAKCRKQENQMHKG VILGTANHLDACRVAPYVNMGALRMPFQQVQAQLQLEGVAHAH  
PHLHPHLAAHAPYLMFPPPPFGLPIASLAESASAAAAVVAAAAKSNSKNSS IADLRLKARKHAEALGL

>SHOX2\_DA

MEELTAFVSKSFDQKVKEKKEVITYREVLETGSVRNRESLSADPNREEISSITRSGVRSSPVREADMLASERSRD  
SSSPKLTGNTDMKERKEDCKPLEDETTQTKIKQRRSRTNFTLEQLNELERLFDETHYPDAFMREELSQRLLGLSEA  
RVQVWFQNRRAKCRKQENQLHKGVLIGAASQFEACRVAPYVNVGALRMPFQQASDHCNVPPFSFQVQAQLQDLS  
AVAHAAHHLHSHLAAHAPYMMFPAPPFGLPLATLAAESASAAASVVAAAAAAKTNTKNSS IADLRLKAKKHAAALG  
L

>SHOX2\_HU

MEELTAFVSKSFDQKVKEKKEAITYREVLESGLRGAKEPTGCTEAGRDDRSPAVRAAGGGGGGGGGGGGGGGG  
GGVGGGGAGGGGAGGGRSPVRELDMGAAERSREPGSPRLTEVSPELKDRKEDAKGMEDEGQTKIKQRRSRTNFTLE  
QLNELERLFDETHYPDAFMREELSQRLLGLSEARVQVWFQNRRAKCRKQENQLHKGVLIGAASQFEACRVAPYVNV  
GALRMPFQQDSDHCNVTPLSFQVQAQLQDLSAVAHAAHHLHSHLAAHAPYMMFPAPPFGLPLATLAADSASAAASVV  
AAAAAAKTNTSKNSS IADLRLKAKKHAAALGL

>SHOX2\_MO

MEELTAFVSKSFDQKVKEKKEAITYREVLESGLRGAKEPGCVEPGRDDRSPAVRAAGGGGGAGGGGGGGGGGGG  
GGAGGGGAGGGGAGGGRSPVRELDMGAAERSREPGSPRLTEVSPELKDRKDDAKGMEDEGQTKIKQRRSRTNFTLE  
QLNELERLFDETHYPDAFMREELSQRLLGLSEARVQVWFQNRRAKCRKQENQLHKGVLIGAASQFEACRVAPYVNV  
GALRMPFQQDSDHCNVTPLSFQVQAQLQDLSAVAHAAHHLHSHLAAHAPYMMFPAPPFGLPLATLAADSASAAASVV  
AAAAAAKTNTSKNSS IADLRLKAKKHAAALGL

>SP83252

MVAGVMSEEEYKTALQKQTLQMSPREGTQYTPGSPTRSRTSSPSTSSSTIECGGAGGGQNDGAEGERKSPLSNG  
DLLLLKKRRYRTTFTSFQLELEKAFERTHYPDVFTREDLANRVELTEARVQVWFQNRRAKWRKKEKQQGLPSPT  
AQPIAATSTPPALISSHETSTRVITLNPSSLLQSPDTTTTTILATPEASVALPTLPQATTVPVPLAHFLSGAASG  
ATQPRQWHHPALNFLSTTPSTNTTTLRAITLPGGIVLQPTLATLPATAPAGTTQIIGLHPAQTAASAGVFAP  
QILSSPFQLAQIPVSMATGLSSGVITLQLAQQNVTSS

>SP86105

MATGNPAGKFGGRHYSLDSPGSLTSPPAYDMPLMPGAGPEQKPGVSALSMQNSCAGGQMSMSSCSPPFQINPLV  
YSHPGHAGLLPLNSTSLATVHAPNSHAGMYLHHPGAGMPVSSMSIGRSEPYRKQRRHRTNFTSHQLEELEKA  
FEKTRYPDVFMREELAMKISLTEARVQVWFQNRRAKWRKAEKAAAAANQKDSKDSQESPVSSPAPSDGKGASS  
PKKSTSSPLSSPPARKMHPSTGGNESWTSSPVDSFSPPTFHSPFQSPSIIPTSCPTPNPIHSYTPESPFAAMGIV  
SHQTPTGTGAPTGAGHFTNSYLQSMTRYAPHC

>SP87530

MFTIERLLNLQPTKSSKPPAEKYVDLTI GEKEERRHKQRYTSSCDSAAESDKDSIISDDYSTSPVQSPKGSVNI I  
MKSkrnrtTFTAHLDELEMIFRQTHYPDVLRLREKLAQRIGLPESRVQVWFQNRRAKWRKREKLI AAADAQMKAL  
SNNHSIHHSNPSPLSIPPAATPAGLYWSPAANSVTPTWTLPATPGSII SPSHLPGAATSRLSQPPPLIPLSSI  
NCSPTSSTTGGSLSTLTSNNSAILSPPLLQRREGGSSNGAGVLM AAAGVNPFSLYLSTLTPQQSIIIIQQ

>SP87700



MPVAMMQKHSPELEGTPPAAIANINGGLLVAGSDSPKLENGIESPGSSSVKSEDDGGSDTERGSSKSSSSSSKRQQ  
RRFRTTFTSYQLQELEAAFAKTHYPDVFMREDLALRINLTEARVQVWFQNRRAKWRRAQKASQLAMGDIMSGRGV  
SMMAGGGGIPMHGMMPHNFAATLPTNLSPGSSVLMTPKSAGTSPSAHMFQNKPFVLHHPNQLPSSSMSAYPTPW  
NTQNQFVFPSTTMTFSNNHSPSSSSPPVCSGVMTPOW

>SP89232

MEQTGEALSDEGPKVAPINTNSYSSDFSVSTRLLQADNPTQGASSSYIAPTYPTDNYSSNPPPPNGWQFLLPSD  
MGTARGHPHSTGQYEPAPNASLSLMPPPYQSIAYCNGYPGSKIIGISSLPSQSLDVHGHHTSIPPLHKKFDIGY  
NSWNVGASSSTGSGSNSGKPLPPVGTLTSPPSVSYPPSSPSYNDQNPDSRPPMAIKEESYIESDDRGEEDYGPS  
DEESDSNSTTDKDAEPKKPKRTRTAYSNSQLDQLELIFATTHYPDVFTREDLSRRLGIREDRIQVWFQNRRARFR  
KQERTGSI SCRSRYRQKRLEKLQHNFMPSAGYPPTHYPPSVVGGGNTLSLVSSPSVSTTSPVSYDFSQSQGFSF  
QTSFYVPVTPNYRSYSTGTAFQYPGGLASLFQTAPSTAEGK

>SP91658

QDNPDSRPPMAIKEESYIESDDRGEEDYGPSDEESDSNSTTDKDAEPKKPKRTRTAYSNSQLDQLELIFATTHY  
PDVFTREDLSRRLGIREDRIQVWFQNRRARFRKQERTGSI SCRSRYRQKRLEKLQHNFMPSAGYPPTHYPPSVS  
QGFSFQTSFYVPVTPNYRSYSTGTAFQYPGGLASLFQTAPFDCRGK

>toe\_DR

MATSTSPGPTRTTAAIRVSLPGAAPAI PATATAGSQSPGAIMPMAAVPLPSHLQLLGSSAGGVQPAAITPVSP  
AATTVLAQPHSLSPSTPILTQGAPPAAAALGGIFCGGSAAAAGPAAAAAATNLNALASQHRLLELSRFGLRGYDLA  
QHMLSQQGAVSKLLGLTLRPPGLIGGSKPKVATPTVVSKIEQYKRENPTIFAWEIRERLITEGVCTNATAPSVSSI  
NRILRNRAAERAAAFAAASYGAIHPHPYTSFPTWPAHHPLWGAVPLATPPGGGPAGAGGALQPGGSGSS  
YGS DGNMSSNPNSNSNTTHSNHNTNSGSGCGDSSAGSGRLSLPALS PDSGSRDSRSPDADANRMI DIEGEDSE  
SQDSDQPKFRNRRTTFSPEQLDELEKEFDKSHYPCVNTREKLAARTALSEARVQTSEMAAPPAGQLDQAARLALD  
IELTHAVGQSGGQSQSNPSSSSSSCSRIWPTEAAISVQHQQHVQHQQQQQQQSTVQHHQSRQQNEQQNQRRQQQ  
PAHGRASSGGGHCLTHSISSI INGR

>toy\_DR

MMLTTEHIMHGHPHSSVQSTLFGCSTAGHSGINQLGGVYVNGRPLPDSTRQKIVELAHSGARPCDISRILQVSN  
GCVSKILGRYIETGSIKPRAIIGGSKPRVATTPVVQKIADYKRECPSIFAWEIRDRLLSEQVCNSDNIPSVSSINR  
VLRNLASQKEQQAQQQNESVYEKLRMFNGQTGGWAWYPSNTTTAHLTLPPAASVVTS PANLSGQADRDVQKREL  
QFSVEVSHNTSHDSTSDGNSEHNSSGDEDSQMRLRLKRKLQRNRTSFSNEQIDSLEKEFERTHYPDFARERLAD  
KIGLPEVWFSNRRAKWRREEKMRTQRRSADTVDGSGRTSTANNPSGTTASSSVATSNNSTPGIVNSAINVAERTS  
SALVLGGEANTHTTSSPPLQPAAPRLPLNSGFNTMYSSIPQPIATMAENYNSSLGSMTPSCLQQORDAYPYMFH  
DPLSLGSPYVSAHHRNTACNP SAAHQPPQHGVYTNSSPMPSSNTGVI SAGVSVPVQISTQNVSDLTGSNYWPRL  
Q

>UNC4\_DR

MVLETSEGDTKKFLTNNNNSASRNNNSHNNNNNHSPKEIPEETGRSSSTSSNSIPNAHRTNAGQHLLGGSPSS  
ACSTSVSGCGMPSEGLHPTAALQLYAAAAQLAPNGVRVPPWGPFLQFGVPGVFGPNGPFLGRPRFDAASAGGHPN  
SAAAAAATQMAAVNASNAFANLTGLSAAALRNVSAAQT TAVAAVASTVATI QHRLMIGNRQSLPPAGPPSEGSN  
EDGGFPDGD DDDSSAAKRRRSRTNFNSWQLEELERAFSASHYPDIFMREALAMRLDLKESRVAVWFQNRRAKVRK  
REHTKKGPGRPAHNAQPQTCSGEP IPPNELKAKERARRRKKLAKAIDRQARKLQAKGITVDLEALKA EYISQHKA  
NGTFSDSDLEDDGIQIDVVGTTSDSDEGSDAVSPVRLGGGGGGGGTGGGGGGGASSSLHCGLDGDGDSSRAGS  
FIGGGGSLGSPSSVAPPMSLNGAVQFGKLEPMDGNESEERDRERDSPKPLLFPKAFHQLNLQSSQQHHGLVVG  
QGQSGSGHGHGHQHNNHHQHHLHGHGSASASAAAANLVHQTSPISMRNSNPFSIESLLFNNT

>UNC4\_HU

MMDGRLLEHPHAQFGGSLGGVVGFPYPLGHHHVYELAGHQLQSAAAAASVPF SIDGLLGGSCAAAASVVNPTPLL  
PAACGVGGDQPFKLSDSGDPDKESPCKRRRTRTNFTGWQLEELEKAFNESHYPDVFMREALALRLDLVESRVQ  
VWFQNRRAKWRKKENTKKGPGRPAHNSHPTTCSGEPMDPEE IARKELEKMEKKKRKHEKKLLKSQGRHLLHSPGGL  
SLHSAPSSSDSDSGGGGLSPEPEPPPPAAKGP GAHASGAAGTAPAPPGEPPAPGTC DPAFYPSQRSGAGPQPRPG  
RPADKDAASC GPAAVAVERGAAGLPKASPFVSESLSDSPPRRKAASNAAAAAAGLDFAPGLPCAPRTLIGK  
GHFLLYPITQPLGFLVPQAALKGGAGLEPAPKDAPPAPAVPPAPPAQASFGAFSGPGGAPDSAFARRSPDAVASP

GAPAPAPAPFRDLASAAATEGGGGDCADAGTAGPAPPPPAPSPRPGPRPPSPAEEPATCGVPEPGAAAGPSPEGE  
EELDM

>UNC4\_MO

MMDGRLLEHPHAQFGGSLGGVVFYPLGHHHVEYELAGHQLSAAAAAASVPFSDGLLSGSCAAAAASVVNP  
TPLLPAACGVAGESQPFKLADSGDPDKESPGCKRRRTRTNFTGWQLEEELEKAFNESHYPDVFMREALALRLDLVE  
SRVQVWFQNRRAKWRKKENTKKGPGRPAHNSHPTTCSGEPMDPEE IARKELEKMEKKKRKHEKKLLKSQSRHLHS  
PGGLSLHSAPSSSDSDSGGGLSPEPPEPPPTAAAKGPGAHSAGSAPVPPGEPAPGTCDPAFYPSQRSGAG  
SQPRLGRPADKDTVPCGPGAAATAGLPKASPFVSVESLLSDSPRRKATPANAAATAGLDFTPLGPCAPRTLIGKG  
HFLLYPITQPLGFLVPAALKGGAGPELVPKDAPPAPPAPPAQASFGTFPGPGAADPAFARRSPEVVASPG  
PPAPASFRDLTAAAAESGAGDCADVGTVCPAASPPPLETSPGPGPRAPSPPGEPATCGAAEPGAATGSPPEGE  
EVDMD

>UNCX\_DA

MMDSRILDPHAQFGGSLGGMVVFYHLSHHHVEYELAGHQLSSTAAPFSDGLLNGSCTASVVNSNPLSSGCG  
MNGDNQYKLTDSGDPDKDS PGCKRRRTRTNFTGWQLEEELEKAFNESHYPDVFMREALALRLDLIESRVQVWFQ  
RRAKWRKKENTKKGPGRPAHNSHPTTCSGEPMDPEE IARRELERLEKKKRKQERRLLKSQNKLLPGDLFHTPGSD  
SDSGLSQITDSEQSLHCDMGRNQTPSCDQTPQKLQNRNADQDASGSELDSSDSGQQSNLCSNSRSSALQKLN  
FSVESLLSDSRPRRKPMDFFVPTPRPLIGKGFLLYPIITQPLGFIVPQTALKSTAPGPDTEGQKGPATDITFA  
GNPGHRNAKENNSVNNNSGARAIKQVVSQSGNISCSSTQSSSPQTTINGHSAGSCNERCPQDIELELVDPKSPQSE  
KKEQSLPDYPPQNSESATTSKDTDKDSVDVDM

>UNCX4\_DA

MMDSRILEHPHAQFGGSLGSMVGMGFYHLSHHHVEYDISHGHLQLSAAAVPFSIDGLLNGSCSGSVANSNPLLSG  
CGVNGDSQYKLGDDGDPDKESPGCKRRRTRTNFTGWQLEEELEKAFNESHYPDVFMREALALRLDLVESRVQVWFQ  
NRRAKWRKKENTKKGPGRPAHNSHPTTCSGEPMDPEE IARRELERLEKKKRKQERKLLKSQNKLLAGELFHTPGS  
DSDSGVSQSTDESTPHTGPHSAHRQQTTEHICEQHARHORASTVNETAEPMDSTRNSGLCPANGITRSTLQKL  
NPFVSVESLLADSSPRRKTILDFSQLPPQRPLVGGKGFLLYPIITQPLGFIVPQTAMKQSHDSGNSGHHHCSTTDTST  
SNQKNVNLCDRNTGASDELQRETKNSSIQSPSTSSSEKCFSESNSPQKESSENDESESTVNTSSQKESISANLSEYS  
DRKSRSSADTNTDGEDVDM

>VSX1\_DA

MTGREETDEKPKVKLYPSFGIDKSRNGSGFRSKGFAITDLLGLESELQPHQSGTGAGPNQEGQSAAVGGFSFP  
GGSLPLGLGFLCSLAAQQPPGAPCFLPSHILLQSRTESHFMQNLQQRDVYSDDDCLSGDRNDGKNSGNSQKRK  
KRRHRTVFTSHQLEEELEKAFNEAHYPDVYAREMLAMKTELPEDRIQVWFQNRRAKWRKREKCGRSSVMAEYGLY  
GAMVRHSIPLPESIINSAKSGMMGSCAPWLLGMHKKSMIVKKAAPTPESTHSDTYSEEHKGKSDTTWSSGANG  
ADDSEMDAIDLSSSTSKQENKSTLKRSPPRTESSDSENE

>VSX1\_DR

MQATKMRTPFAIQEILGLGAYQQQATASATPSEAPPSPAATPPPTANTPANGSLSAVQQQQQQQQQQQQQQQQQLQ  
QQQQQAIDSLRESRSISPDVSRLSAAAAAAAAAAAAHCQLPVFNANFYAAAAGYAAAADPGNAAAAHHHMTTLAA  
AAYLRGFLPPGFSTPHEFRGHFQQHFQAQFAEQAAAARGQYASSLANASGDEQSPSKNSSSSGNGGSGGSGSGG  
GGNPTSNGLGLSPTASNGGSGGAGVGGSGGSGTSGSSSSTSGNGGNGGSGSRSSPAGPHHSAALAAHQHA  
AAAAAAAAHHHAAAAAAAAHHAHAHAQAHAAHAHVHAAHAAHAAHAAHAAHAAHAAHAEAFLLGAAGGAGGNPNSLLAAG  
GDVLVGPGGTGPGGKKNRRHGRITFTSSQLEEELEKAFKEAHYPDVSARELLSMKTGLAEDRIQVWYQNRRAK  
RKTEKCGWGSTKMAEYGLYGAMVRHSLPLPETI IKSAREDESVPWLLGMHKKSLAEEALLKSDSDRETPTSDD  
TNTSYSAGSTHNSPISSFSISRLLFDAPPPAAGSAGGKGHHHHHHHHKGGHHHAAVHAQAQAHAAHMLLHHQQQQQ  
QQQQQHHLHLAAENSLQQQVAGTGSAGSGSGSGTGAAGTGPAAHPYNQQQHLHLQQLQQQQQQQQQQAQ  
QQQQHHHHQHHSVHHMHHHNAAGYAEAAVAAAAAANAANAAAAAASASASAAVTIAESEAE  
EQDDIEDMELDKDCEVEEDVEPVDNDTNTNNEHDNECDADADVEADVDADADADPEIDICDDHDEEMRLQEQLL  
KVKQEQAHLGSR

>VSX1\_HU

MTGRDLSLDGRTSSRALVPGGSPRGRPRGFAITDLLGLEAELPAPAGPGQSGGCEGPAVAPCPGPGLDGSSLAR  
GALPLGLGLLGGFTQPPAAARAPCLLLADVPFLPPRGPEPAAPLAPSRPPPALGRQKRSDSVSTSEDEDSQSEDR

NDLKASPTLGKRRKRRHRTVFTAHQLEEELEKAFSEAHYPDVYAREMLAVKTELPEDRIQVWFQNRRAKWRKREKR  
WGGSSVMAEYGLYGAMVRHC IPLPDSVLNSAEGGLGSCAPWLLGMHKKSMGMIRKPGSEDKLAGLWGSDFKKEG  
SSQSESGSQRGSDKVPENGLDVAIDLSSSARQETKKVHPGAGAQQGGSNSTALEGPQPGKVGAT

>VSX1\_MO

MTGRDGLSDARSRLALAPGCPPTGSRLRSFAINDLLGLEADLPTPAEPGLRSNSGDPAAEIGSGPGPGPLCGS  
CPARGALPLGLGLLCGFQAQPPSAAAAARARCLLLADLRLLPASAGPEPAVAQGPVHPPPALGSQQRSESVSTSDG  
DSPSEEKNDPKMSLILGKRRKRRHRTVFTAHQLEEELEKAFGEAHYPDVYAREMLAAKTELPEDRIQVWFQNRRAK  
WRKREKRWGGSSVMAEYGLYGAMVRHC IPLPDSVLNSADSLQGSAPWLLGMHKKSTGMRKPESEDKLAGLWFEF  
HLKKGANKDEDPGERGPDETTQNPENSLEDVAIDLSSSSRQETKKMPPGSSTQLPQPQVGS

>VSX2\_DA

MTGKDGAVLSESLNKSLSLCAENGGNNPHLSKSSITHPPKCTGFGIQEILGLNKEPSSAPRSTLDSFPAGAHL  
LASRSMGLPAGVGVGMGLIGPGGIPSYFYSQPAFLEVLSDAQNVHLQPLSRTVGPLEHNQSASSDSDVSSSER  
KMSKSSLSQSKRRKRRHRTIFTSYQLEEELEKAFNEAHYPDVYAREMLAMKTELPEDRIQVWFQNRRAKWRKREK  
CWGRSSVMAEYGLYGAMVRHSIPLPESILKSAKDGIMDSCAPWLLGMHKKSLTAGHQSNEKSDVTQTPTNPKPD  
EAEAEERRTESPMSKEELRENSIAALRAKAQEHSAKVLGTVSSERLEHNMETTATEEKSSSEQIDAKEEEKSS

>VSX2\_DR

MPQRSPFAIQELLGLAVAAAATEAPDLDLTTTAGATVAKERQTPTPPKTTNATMATAAATSAATAATPTNAAEGNLT  
VSEPOQQPQQQQQEQHHQHPPHHQYREHHQMTMAAASRMAYFNAHAAVAAAFMPHQLAAAVHHHHQHQHHPHH  
HPHPHGHAVGGPPPPPMQHHPHHPHPLLHAQGFQQLKSFAAGAGTCLPGSLAPKDFGMESLNGFVGPNSKK  
KKKRRHRTIFTSYQLEKLEEFKEAHYPDVYAREMLSLKTELPEDRIQVWFQNRRAKWRKTEKVGWGGSTIMAE  
YGLYGAMVRHSLPLPDTILKSAKDNDAVAPWLLGMHRKSIEAQSAKDDSGVSDHEDSAGSKSAHSEDLRSRCH  
ALSSSTESLNVVSPAPSSCPTSASTSAPPTSTSGYAGAASSAATPTGASTTNSSSSPHIELGSPSPQQQHLQL  
QQQQQQASLYLGAGAVVTCAPPYHPLLDAAANAAGAGAAAASKDFHMIMNTAVAAAAAAQQQHQQQQQQQQQ  
ATATAPGLHAHNLAALMEHDPDAFRNNSIACLRAKAQEHQARLLNNGGLFLQVRRFAQQAQIQDPSDMLKLE  
EHNNSPIPIPPAHSTVNTQVNVKMELTANGGSMKNYEEA

>VSX2\_HU

MTGKAGEALSKPKSETVAKSTSGGAPARCTGFGIQEILGLNKEPPSSHPRALDGLAPGHLLAARSVLSPAGVGG  
MGLLGPGLPGFYTQPTFLEVLSDPQSVHLQPLGRASGPLDTSQTASSDSEDVSSSDRKMKSALNQTKKRKR  
HRTIFTSYQLEEELEKAFNEAHYPDVYAREMLAMKTELPEDRIQVWFQNRRAKWRKREKWCGRSSVMAEYGLYGAM  
VRHSIPLPESILKSAKDGIMDSCAPWLLGMHKKSLAAAAESGRKPEGERQALPKLDKMEQDERGPDAAAIQEE  
LRENSIAVLRKAQEHSTKVLGTVSGPDSLARSTEKPEEEEEAMDEDRPAERLSPQLEDMA

>VSX2\_MO

MTGKAGEALSKPKSETVAKSTSGGAPARCTGFGIQEILGLNKEPPSSHPRALDGLAPGHLLAARSVLSPAGVGS  
MGLLGPGLPGFYTQPTFLEVLSDPQSVHLQPLGRASGPLDTSQTASSDSEDVSSSDRKMKSALNQTKKRKR  
HRTIFTSYQLEEELEKAFNEAHYPDVYAREMLAMKTELPEDRIQVWFQNRRAKWRKREKWCGRSSVMAEYGLYGAM  
VRHSIPLPESILKSAKDGIMDSCAPWLLGMHKKSLAAAAESGRKPEVERQALPKLDKMEQEERAPEAAAIQEE  
LRENSIAALRAKAQEHSTKVLGTVSGPDSLARNAEKPEEEDATEEDRPAEKLSPPQLEDMA

>CEH10

MAVDEMQLAASMQMSNMQMSNSQRMSFAIHEILGIQGNAYLSHGYPQGTFLSNQPNFMDIGSCGVSGFDRQLCGT  
DSIGNAPAPLMYRMPITSEVITSEPQTHVSSSILSSATTSNSSGGGSSGGGKASKRKRHRTIFTYQIDE  
LEKAFQDSHYPDYAREVLAKTELDRIQVWFQNRRAKWRKTEKWTGKSTIMAEYGLYGAMVRHSLPLPETIT  
KSAEADPQQAAPWLLGMHKKSMEEAAHLESVEKCDMSDSDDDDRPVTTPVQRQVKNEYKPRIIEHVQQAPQH  
QSSLNFDTSLVVSSLSQLHFQDSQMI PNNNASLKLHYDYNPM

>HyHox1

MYSVSGDITFAPKIYNHSPILTTNNTCKTTRSERGYSHTLEYFPNRPIIAKSQLNNKTPIWQQNASKITNYTAP  
YNKNIDENYRPLELFKQETPYNKARKKHFEHYQLYQNTKEHALLKNVAAEKKITTELIVLDDLKEYKGEYQSDN  
SQSSDNQSNDAFRKRCFSGHSKIIELEKEFKYNYLSRDRRVEFARNLELSESQIKIWFQNRMRKQKKEQIVNDL  
TKKDDDSPWFRIEKLHSLTEPFLSTNQVSPMFHTFLN

## 2) Homeodomain alignments of PRD class used for phylogenetic analysis

```
>a1_DR
QRRYRTTFTSFQLEEELEKAFSRTHYPDVFTREELAMKIGLTEARIQVWFQNRRAKWRKQE
>ALX1_DA
KRRHRTTFTSAQLEEELEKVFQKTHYPDVYVREQLAMRTELTEARVQVWFQNRRAKWRKRE
>ALX1_HU
KRRHRTTFTSLQLEEELEKVFQKTHYPDVYVREQLALRTELTEARVQVWFQNRRAKWRKRE
>ALX1_MO
KRRHRTTFTSLQLEEELEKVFQKTHYPDVYVREQLALRTELTEARVQVWFQNRRAKWRKRE
>ALX3_HU
KRRNRRTTFSTFQLEEELEKVFQKTHYPDVYAREQLALRTDLTEARVQVWFQNRRAKWRKRE
>ALX3_MO
KRRNRRTTFSTFQLEEELEKVFQKTHYPDVYAREQLALRTDLTEARVQVWFQNRRAKWRKRE
>ALX4_HU
KRRNRRTTFTSYQLEEELEKVFQKTHYPDVYAREQLAMRTDLTEARVQVWFQNRRAKWRKRE
>ALX4_MO
KRRNRRTTFTSYQLEEELEKVFQKTHYPDVYAREQLAMRTDLTEARVQVWFQNRRAKWRKRE
>ALX4a_DA
KRRNRRTTFTSYQLEEELEKVFQKTHYPDVYAREQLALRTDLTEARVQVWFQNRRAKWRKRE
>ARX_DA
QRRYRTTFTFTSYQLEELERAFQKTHYPDVFTREELAMRLDLTEARVQVWFQNRRAKWRKRE
>ARX_HU
QRRYRTTFTFTSYQLEELERAFQKTHYPDVFTREELAMRLDLTEARVQVWFQNRRAKWRKRE
>ARX_MO
QRRYRTTFTFTSYQLEELERAFQKTHYPDVFTREELAMRLDLTEARVQVWFQNRRAKWRKRE
>CEH10
KRRHRTIFTNYQLEEELEKAFKESHYPDVYARENLSLKIDLPEDRIQVWFQNRRAKWRKKE
>CG11294_DR
QRRNRRTTFTPQQLEALEALFQKTHYPDVFLREEVALRISLSEARVQVWFQNRRAKWRKQA
>CG13141_DR
QRRSRTNFTLDQLNELERLFEETHYPDAFMREELSQRGLSEARVQVWFQNRRAKCRKHE
>CG32532_DR
RRRHRTTFTQEQLAELEAAFAKSHYPDIYCREELARTTKLNEARIQVWFQNRRAKYRKQE
>CG34367_DR
QRRSRTNFTLDQLNELERLFEETHYPDAFMREELSQRGLSEARVQVWFQNRRAKCRKHE
>CG9876_DR
PRRNRTTFSSAQLTALEKVFERTHYPDAFVREELATKVHLSEARVQVWFQNRRAKFRRNE
>crx_DA
QRRERTTFTTRTQLDILEALFTKTRYPDIFMREEVALKINLPESRVQVWFKNRAKCRQQQ
>CRX_HU
QRRERTTFTTRSQLEEELEALFAKTQYPDVYAREEVALKINLPESRVQVWFKNRAKCRQQR
>CRX_MO
QRRERTTFTTRSQLEEELEALFAKTQYPDVYAREEVALKINLPESRVQVWFKNRAKCRQQR
>DMBX1_HU
QRRSRTAFTAQQLAELEKTFQKTHYPDVVMRERLAMCTNLPEARVQVWFKNRAKFRKKQ
>DMBX1_MO
QRRSRTAFTAQQLAELEKTFQKTHYPDVVMRERLAMCTNLPEARVQVWFKNRAKFRKKQ
>DMBX1a_DA
QRRSRTAFTAQQLAELEKTFQKTHYPDVVMRERLAMCTNLPEARVQVWFKNRAKFRKKQ
>DRGX_DA
QRRNRRTTFTLQQLAELEAVFAQTHYPDVFTREELAMKINLTEARVQVWFQNRRAKWRKTE
>DRGX_DR
QRRNRRTTFTLQQLAELETAFAQTHYPDVFTREDLAMKINLTEARVQVWFQNRRAKWRKAE
>DRGX_HU
QRRNRRTTFTLQQLAELEAVFAQTHYPDVFTREELAMKINLTEARVQVWFQNRRAKWRKTE
>DRGX_MO
QRRNRRTTFTLQQLAELEAVFAQTHYPDVFTREELAMKINLTEARVQVWFQNRRAKWRKTE
>DU4L2_HU
GRRRRLVWTPSQSEALRACFERNPYPGIATRERLAQAIGIPEPRVQIWFQNERSRQLRQH
>DUX4_2_HU
```



>DENV\_026119\_XP\_002164410.3  
QKRHRTRFTQTQLNELERYFNKTHYPDIFVREELAMRIDLTESRVQVWFQNRRAKWKRR  
>DENV\_027852\_XP\_004207550.1  
GRRPRTSITLCQRDFLECEFOKERYPTLLYINKLSSKINLSQYVIKVVWFQNRRAKYRKEG  
>DENV\_043831\_XP\_002165604.2  
KRRHRTIFSDQLNVLERLFNKTHYPDVIVREEIAGIINLTEEKVEVWFKNRRARWRKQK  
>DEN\_079506\_XP\_002157088.1  
RRRERTTFTKAQLDVLDMFGKTMYPDVFMRREEVAKKINLAEARVQVWFKNRRAKFRRSR  
>DENV\_110060\_XP\_002163599.1  
QKRHRTRFNPSQLNELERYFNKTHYPDIFVREELALRIGLTESRVQVWFQNRRAKWKRRK  
>DENV\_130791\_XP\_012554469.1  
QRRERTTFTKSQLEILEELFLKTHYPDIFMREEAARKINLPESRVQVWFKNRRAKHRQKA  
>DENV\_177203  
QRRNRRTTFSKQQLMELELTFQKKHYPDINTREALAEQIGITEARIQVWFQNRRAKWRKLS  
>DENV\_189615\_XP\_002160816.1  
QRRYRTTFTQFQLDELERAFDKTHYPDVFMRREELAVRVHLTEARVQVWFQNRRAKWRKRE  
>DENV\_191873  
QRRYRTTFTQFQLDELERAFDKTHYPDVFMRREELAVRVHLTEARVQVWFQNRRAKWRKRE  
>HyHox1  
AFRKRCSEFGHSKIIELEKEFKYNKYLSRDRRVEFARNLELSESQIKIWFQNRMRKQKKEQ  
>ISX\_HU  
KRRVRTTFTTEQLHELEKIFHFTHYPDVHIRSQLAARINLPEARVQIWFQNRRAKWRKQE  
>ISX\_MO  
KRRVRTTFTTEQLQELEKLFHFTHYPDIHVRSQLASRINLPEARVQIWFQNRRAKWRKQE  
>MIXL1\_DA  
HRRKRTNFTQQOQIDVLEKVYLDTKYPDIYLREKLEALTGLPESRIQVWFQNRRAKSRRQV  
>MIXL1\_HU  
QRRKRTSFSAEQLQLELVFRRTYPIHLRERLAALTLPEESRIQVWFQNRRAKSRRQS  
>MIXL1\_MO  
QRRKRTSFSSEQLQLELVFRQTMYPDIHLRERLAALTLPEESRIQVWFQNRRAKSRRQS  
>MXTX1\_DA  
SRRKRTSFSKEHVELLRATFETDPYPGISLRESLSQTTGLPESRIQVWFQNRRAKTLKCK  
>MXTX2\_DA  
GRRKRTSFTKEHLELLKMAFNVDYPYPGISVRESLSQATGLPESRIQVWFQNKARTLKNR  
>NOBOX\_HU  
RKKTRTLYRSDQLEELEKIFQEDHYPDSDKRREIAQTVGVTPQRIMVWFQNRRAKWRKME  
>NOBOX\_MO  
RKKTRTLYRSDQLEELERIFQEDHYPDSDKRHEISQMGVTPQRIMVWFQNRRAKWRKVE  
>NvCART1  
KRRNRRTTFTAYQLEEMERVFQKTHYPDVYTRQLALRCALTEARVQVWFQNRRAKWRKRE  
>NVDMBXa  
IRRTRTTFNQFQLDTERAFSRTHYPDVLLREQLAVYTNLPESRIQVWFKNRRAKYRKS  
>NVDMBXb  
SRRTRTAFTHQQLTALEKVFVSKTHYPDVEVREQLATSTNLQEARIQVWFKNRRAKYRKDQ  
>NVDMBXc  
PRRRTCFTPYQLQVLENTFCNTHYPDVMLREQLASYVNLPEARIQVWFKNRRAKHRKND  
>NVDMBXf  
HRRTRTAFTHQQLQILESTFSKTHYPDVVMREQLAAYINIPESRIQVWFKNRRAKYRKQV  
>NVDUXa  
HRRQRTFFSKEQTVILEGAFQYERFPGIQIREKLARELDIDESRIQVWFQNRRSRQNRQK  
>NVDUXb  
HRRQRTFFSKEQTVILEGAFQYERFPGIQIREKLARELDIDESRIQVWFQNRRSRQNRQK  
>NVDUXc  
HRRQRTFFSKEQTVILEGAFQYERFPGIQIREKLARELDIDESRIQVWFQNRRSRQNRQK  
>NVGSC  
KRRHRTIFTEEQLELLETTFFQKTHYPDVLLREELAMKVDLKEERVEVWFKNRRAKWRKQK  
>NVHBN  
VRRSRTTFTTYQLHQLERAFKQYDPDVFVTRREELALRLDLSEARVQVWFQNRRAKWRKRE  
>NVHD014  
QRRSRTKFTSKQVDELEKAFKTKQYDPDVFVTRREELAQRNLNTEARVQVWFVSNRRARLRKKK  
>NVHD031

RRRCRTVFSTEQLAILEEGFQKQHFPDNKLRQAIATRAGLPEDRVQVWFQNRRAKEKRL  
>NVHD037  
KRRHRTTFSKQLQDSLEEAFSRSQYPDVFTREQLAKRINLNEARVQVWFQNRRAKHRKQE  
>NVHD052  
IKRKRNLTKRQKILETAYSTIKYPTIEDRQRLETSTQLSEDRIQVWFQNRRAKDRRLQ  
>NVHD058  
HRRKRTTFTHDQLQLEAYFHNNRYPGIEQREGLAEKIQVSESRLQVWFQNRRSKWRKHQ  
>NVHD074  
QRRNRKFTAYQLEQLEDAYQKAKYPDQARETLAQRGLGVAESRVQVWFSNRRSKGKRKE  
>NVHD100  
QRRYRTTFTSYQLEELERAFKTHYPDVFTREALAVKIDLTEARVQVWFQNRRAKWRKRE  
>NVHD101  
PRRSRTRFTVSQTDELERAFKTHYPDIYAREELAQRGLGLSEARVQVWFSNRRARLKER  
>NVHD146  
GKRYRATFDKAQIFQMERVFLLNHYPDVAARSELSRRTGLSESQVQIWFQNRRAKWRKQ  
>NVHD148  
SRRQRTNFTDEQIEKLEKVFEEKTHYPDVFTREELAQQVNLSEARIQVWYSNRRAKWRKE  
>NVOTP  
QKRHRTRFTPAQLNELERCFAKTHYPDVFMREELAARIGLTESRVQVWFQNRRAKWKRRK  
>NVOTXa  
QRRERTTFTKNQLEVLLEELFAKTRYPDIFMREEVAIKINLPESRVQVWFKNRRAKTRQLE  
>NVOTXb  
QRRERTTFTKNQLEILEELFAKTRYPDIFMREEVAIKINLPESRVQVWFKNRRAKARQQA  
>NVOTXc  
QRRERTTFTKNQLEILEELFAKTRYPDIFMREEVAIKINLPESRVQVWFKNRRAKLRQLS  
>NVPAX4/6  
LRRNRRTTFTPDQLEMLEKEFEKSHYPDVATREELANKIDMSEARVQVWFSNRRAKWRRHQ  
>NVPTX  
QRRQRTHTFSFQLQLEGTFRNRYPDQMREEIALYTNLTEARVRVWFKNRRAKWRKKE  
>NVREPO  
KTRYRTTFSQYQIEELERAFKAPYPDVFAREELAACLGLTEARIQVWFQNRRAKWRKRE  
>NVRX  
LRRNRRTTFTTFLHELERAFKSHYPDVYTREELALKISLPEVRVQVWFQNRRAKWRRQE  
>NVUNC4  
RMRVRTNFSPWQLEELEHAFETTHYPDVFMREALAMRLDLTEARVQVWFQNRRAKWRKRE  
>oc\_DR  
QRRERTTFTTRAQLDVLEALFGKTRYPDIFMREEVALKINLPESRVQVWFKNRRAKCRQQL  
>OdsH\_DR  
KRRGRTNFNSWQLRELERVFQGSHPDIFMREALATKLDLMEGRIVWFQNRRAKWRKQE  
>OTP\_DR  
QKRHRTRFTPAQLNELERCFSKTHYPDIFMREEIAMRIGLTESRVQVWFQNRRAKWKRRK  
>OTP\_HU  
QKRHRTRFTPAQLNELERSFAKTHYPDIFMREELALRIGLTESRVQVWFQNRRAKWKRRK  
>OTP\_MO  
QKRHRTRFTPAQLNELERSFAKTHYPDIFMREELALRIGLTESRVQVWFQNRRAKWKRRK  
>OTPa\_DA  
QKRHRTRFTPAQLNELERSFAKTHYPDIFMREELALRIGLTESRVQVWFQNRRAKWKRRK  
>OTPb\_DA  
QKRHRTRFTPAQLNELERSFAKTHYPDIFMREELALRIGLTESRVQVWFQNRRAKWKRRK  
>OTX1\_HU  
QRRERTTFTTRSQLDVLEALFAKTRYPDIFMREEVALKINLPESRVQVWFKNRRAKCRQQ  
>OTX1\_MO  
QRRERTTFTTRSQLDVLEALFAKTRYPDIFMREEVALKINLPESRVQVWFKNRRAKCRQQ  
>OTX1a\_DA  
QRRERTTFTTRTQLDILESLFAKTRYPDIFMREEVALKINLPESRVQVWFKNRRAKCRQQ  
>OTX1b\_DA  
QRRERTTFTTRSQLDILEALFAKTRYPDIFMREEVALKINLPESRVQVWFKNRRAKCRQQ  
>OTX2\_DA  
QRRERTTFTTRAQLDVLEALFAKTRYPDIFMREEVALKINLPESRVQVWFKNRRAKCRQQ  
>OTX2\_HU  
QRRERTTFTTRAQLDVLEALFAKTRYPDIFMREEVALKINLPESRVQVWFKNRRAKCRQQ

>OTX2\_MO  
QRRERTTFFTRAQLDVLEALFAKTRYPDI FMREEVALKINLPESRVQVWFKNRRAKCRQQQ  
>OTX5\_DA  
QRRERTTFFTRAQLDVLEALFSKTRYPDI FMREEVALKINLPESRVQVWFKNRRAKCRQQQ  
>PAX3\_HU  
QRRSRTTFTAEQLEELERAFERTHY PDIY TREELAQR AKLTEARVQVWFSNRRARWRKQA  
>PAX3\_MO  
QRRSRTTFTAEQLEELERAFERTHY PDIY TREELAQR AKLTEARVQVWFSNRRARWRKQA  
>PAX3a\_DA  
QRRSRTTFTAEQLEELERAFERTHY PDIY TREELAQR AKLTEARVQVWFSNRRARWRKQA  
>PAX3b\_DA  
QRRSRTTFTADQLEELERAFERTHY PDIY TREELAQR AKLTEARVQVWFSNRRARWRKQA  
>PAX4\_DA  
AHRSR TAFTADQSGRLEKEFT CGLYPDLL TREKLA EETNLSQDT IKVWFSNRRARMRRER  
>PAX4\_HU  
GHRNRTIFSPSQAEALEKEFQRGQYPDSVARGKLATATSLPEDTVRVWFSNRRAKWRRQE  
>PAX4\_MO  
SHRNRTIFSPGQAEALEKEFQRGQYPDSVARGKLAAATSLPEDTVRVWFSNRRAKWRRQE  
>PAX6\_HU  
LQRNRTSFTQE QIEALEKEFER THYPDV FARERLAAKIDLPEARIQVWFSNRRAKWRREE  
>PAX6\_MO  
LQRNRTSFTQE QIEALEKEFER THYPDV FARERLAAKIDLPEARIQVWFSNRRAKWRREE  
>PAX6a\_DA  
LQRNRTSFTQE QIEALEKEFER THYPDV FARERLAAKIDLPEARIQVWFSNRRAKWRREE  
>PAX7\_HU  
QRRSRTTFTAEQLEELEKAFERTHY PDIY TREELAQR TKLTEARVQVWFSNRRARWRKQA  
>PAX7\_MO  
QRRSRTTFTAEQLEELEKAFERTHY PDIY TREELAQR TKLTEARVQVWFSNRRARWRKQA  
>PAX7a\_DA  
QRRSRTTFTAEQLEELEKAFERTHY PDIY TREELAQR TKLTEARVQVWFSNRRARWRKQA  
>PHDP\_DR  
QRRIRTTFTSNQLNELEKIFLETHYPDIY TREEIASKLHLTEARVQVWFQNRRAKFRKQE  
>PHOX2a\_DA  
QRRIRTTFTSSQLKELERVFAETHYPDIY TREELALKIDLTEARVQVWFQNRRAKFRKQE  
>PHOX2b\_DA  
QRRIRTTFTSAQLKELERVFAETHYPDIY TREELALKIDLTEARVQVWFQNRRAKFRKQE  
>PHX2A\_HU  
QRRIRTTFTSAQLKELERVFAETHYPDIY TREELALKIDLTEARVQVWFQNRRAKFRKQE  
>PHX2A\_MO  
QRRIRTTFTSAQLKELERVFAETHYPDIY TREELALKIDLTEARVQVWFQNRRAKFRKQE  
>PHX2B\_HU  
QRRIRTTFTSAQLKELERVFAETHYPDIY TREELALKIDLTEARVQVWFQNRRAKFRKQE  
>PHX2B\_MO  
QRRIRTTFTSAQLKELERVFAETHYPDIY TREELALKIDLTEARVQVWFQNRRAKFRKQE  
>PITX1\_DA  
QRRQRTHTFTSQQLQELEATFQRNRY PDMSTREE IAVWTNLTEARVRVWFKNRRAKWRKRE  
>PITX1\_HU  
QRRQRTHTFTSQQLQELEATFQRNRY PDMSMREE IAVWTNLTEPRVRVWFKNRRAKWRKRE  
>PITX1\_MO  
QRRQRTHTFTSQQLQELEATFQRNRY PDMSMREE IAVWTNLTEPRVRVWFKNRRAKWRKRE  
>PITX2\_DA  
QRRQRTHTFTSQQLQELEATFQRNRY PDMSTREE IAVWTNLTEARVRVWFKNRRAKWRKRE  
>PITX2\_HU  
QRRQRTHTFTSQQLQELEATFQRNRY PDMSTREE IAVWTNLTEARVRVWFKNRRAKWRKRE  
>PITX2\_MO  
QRRQRTHTFTSQQLQELEATFQRNRY PDMSTREE IAVWTNLTEARVRVWFKNRRAKWRKRE  
>PITX3\_DA  
QRRQRTHTFTSQQLQELEATFQRNRY PDMSTREE IAVWTNLTEARVRVWFKNRRAKWRKRE  
>PITX3\_HU  
QRRQRTHTFTSQQLQELEATFQRNRY PDMSTREE IAVWTNLTEARVRVWFKNRRAKWRKRE  
>PITX3\_MO



QRRQRTHTFTSQQLQELEATFQRNRYPD MSTREEI AVWTNLTEARVRVWFKNRRAKWRKRE  
>Pph13\_DR  
QRRYRTTFNTLQLQELERAFQORTHYPDVFFREELAVRIDLTEARVQVWFQNRRAKWRKQE  
>prd\_DR  
QRRCRTTFSASQLDELERAFERTQYPDIYTREELAQR TNLTEARIQVWFSNRRARLRKQH  
>PROP1\_DA  
RRRHRTTFSNEQLEHLELAFRQNHYPDIYYREELARVTKLNEARIQAWFQNRRAKQRKQD  
>PROP1\_HU  
RRRHRTTFSVPVQLEQLESFAFRNQYPDIWARESLARDTGLSEARIQVWFQNRRAKQRKQE  
>PROP1\_MO  
RRRHRTTFNPAQLEQLESFAFRNQYPDIWAREGLAQDTGLSEARIQVWFQNRRAKQRKQE  
>PRRX1\_HU  
QRRNRTTFNSSQLQALERVFER THYPDAFVREDLARRVNLTEARVQVWFQNRRAKFRNE  
>PRRX1\_MO  
QRRNRTTFNSSQLQALERVFER THYPDAFVREDLARRVNLTEARVQVWFQNRRAKFRNE  
>PRRX1a\_DA  
QRRNRTTFNSSQLQALERVFER THYPDAFVREDLARRVNLTEARVQVWFQNRRAKFRNE  
>PRRX2\_HU  
QRRNRTTFNSSQLQALERVFER THYPDAFVREELARRVNLSEARVQVWFQNRRAKFRNE  
>PRRX2\_MO  
QRRNRTTFNSSQLQALERVFER THYPDAFVREELARRVNLSEARVQVWFQNRRAKFRNE  
>PTX1\_DR  
QRRQRTHTFTSQQLQELEHTFSR NRYPD MSTREEI AMWTNLTEARVRVWFKNRRAKWRKRE  
>RAX2\_HU  
HRRNRTTFTTYQLHQLERAF EASHYPDVYSREELAAKVHLPEVRVQVWFQNRRAKWRRQE  
>REPO\_DR  
KKKTRTTF TAYQLEELERAFERAPY PDVFAREELAIKLNLSERSRVQVWFQNRRAKWRKHE  
>RX\_DR  
HRRNRTTFTTYQLHELERAF EKSHYPDVYSREELAMKVNLP EVRVQVWFQNRRAKWRRQE  
>RX\_HU  
HRRNRTTFTTYQLHELERAF EKSHYPDVYSREELAGKVNLP EVRVQVWFQNRRAKWRRQE  
>RX\_MO  
HRRNRTTFTTYQLHELERAF EKSHYPDVYSREELAGKVNLP EVRVQVWFQNRRAKWRRQE  
>RX1\_DA  
HRRNRTTFTTYQLHELERAF EKSHYPDVYSREELAMKVNLP EVRVQVWFQNRRAKWRRQE  
>RX2\_DA  
HRRNRTTFTTYQLHELERAF EKSHYPDVYSREELAMKVNLP EVRVQVWFQNRRAKWRRQE  
>RX3\_DA  
HRRNRTTFTTFQLHELERAF EKSHYPDVYSREELALKVNLP EVRVQVWFQNRRAKWRRQE  
>SEBOX\_DA  
RKRKR TIFSR AQLSELERAFMITPYPDI TLRERL AAL TLLPESKIQVWFQNRRAKSMKSK  
>SEBOX\_HU  
HRRKR TTF SKGQ LLELERAFAAWPY PNISTHEHLAWVTCLPEAKVQVWFQKRWAKI IKNR  
>SEBOX\_MO  
HRRKR TTF SVGQ LVELERVFAARPY PDISTREHLAQVTHLPEAKIQVWFQNRRAKRIKDR  
>SHOX\_DA  
QRRSRTNFTLEQLNELERLFDETHYPDAFMREELSQR LGLSEARVQVWFQNRRAKCRKQE  
>SHOX\_HU  
QRRSRTNFTLEQLNELERLFDETHYPDAFMREELSQR LGLSEARVQVWFQNRRAKCRKQE  
>SHOX2\_DA  
QRRSRTNFTLEQLNELERLFDETHYPDAFMREELSQR LGLSEARVQVWFQNRRAKCRKQE  
>SHOX2\_HU  
QRRSRTNFTLEQLNELERLFDETHYPDAFMREELSQR LGLSEARVQVWFQNRRAKCRKQE  
>SHOX2\_MO  
QRRSRTNFTLEQLNELERLFDETHYPDAFMREELSQR LGLSEARVQVWFQNRRAKCRKQE  
>SP83252  
KRRYRTTFTSFQLRELEKAFERTHYPDVFTREDLANRVELTEARVQVWFQNRRAKWRKKE  
>SP86105  
QRRHR TNFTSHQLEELEKAF EKTRY PDVFMREELAMKISL TEARVQVWFQNRRAKWRKAE  
>SP87530  
SKRNRTTFTA HQLELEMI FRQTHYPDVLLREKLAQR IGLPESRVQVWFQNRRAKWRKRE

```

>SP87700
QRRFRTTFTSYQLQELEAAFAKTHYPDVFMREDLALRLINLTEARVQVWFQNRRAKWRRAQ
>SP89232
PKRTRTAYSNSQLDQLELIFATTHYPDVFTREDLSRRLGIREDRIQVWFQNRRAKFRKQE
>SP91658
PKRTRTAYSNSQLDQLELIFATTHYPDVFTREDLSRRLGIREDRIQVWFQNRRAKFRKQE
>toe_DR
FRNRRTTFSPEQLDELEKEFDKSHYPCVNTREKLAARTALSEARVQ-----TSEMAAPP
>toy_DR
LQRNRTSFSNEQIDSLEKEFERTHYPDVFARERLADKIGLPE----VWFSNRRRAKWRREE
>UNC4_DR
RRRSTRNFNSWQLEELERAFSASHYPDIFMREALAMRLDLKESRVAVWFQNRRAKVRKRE
>UNC4_HU
RRRTRTNFTGWQLEEELEKAFNESHYPDVFMREALALRLDLVESRVQVWFQNRRAKWRKKE
>UNC4_MO
RRRTRTNFTGWQLEEELEKAFNESHYPDVFMREALALRLDLVESRVQVWFQNRRAKWRKKE
>UNCX_DA
RRRTRTNFTGWQLEEELEKAFNESHYPDVFMREALALRLDLIESRVQVWFQNRRAKWRKKE
>UNCX4_DA
RRRTRTNFTGWQLEEELEKAFNESHYPDVFMREALALRLDLVESRVQVWFQNRRAKWRKKE
>VSX1_DA
KRRHRTVFTSHQLEEELEKAFNEAHYPDVYAREMLAMKTELPEDRIQVWFQNRRAKWRKRE
>VSX1_DR
RRHGRTIFTSSQLEEELEKAFKEAHYPDVSARELLSMKTGLAEDRIQVWYQNRRAKWRKTE
>VSX1_HU
KRRHRTVFTAHQLEEELEKAFSEAHYPDVYAREMLAVKTELPEDRIQVWFQNRRAKWRKRE
>VSX1_MO
KRRHRTVFTAHQLEEELEKAFGEAHYPDVYAREMLAAKTELPEDRIQVWFQNRRAKWRKRE
>VSX2_DA
KRRHRTIFTSYQLEEELEKAFNEAHYPDVYAREMLAMKTELPEDRIQVWFQNRRAKWRKRE
>VSX2_DR
RRHSRTIFTSYQLEKLEEAFAKTHYPDVYAREMLSLKTELPEDRIQVWFQNRRAKWRKTE
>VSX2_HU
KRRHRTIFTSYQLEEELEKAFNEAHYPDVYAREMLAMKTELPEDRIQVWFQNRRAKWRKRE
>VSX2_MO
KRRHRTIFTSYQLEEELEKAFNEAHYPDVYAREMLAMKTELPEDRIQVWFQNRRAKWRKRE

```

## Finding orthologs using RBH (reciprocal BAST hits) in planaria and Xenopus

### 1) Command lines used for generating the RBH data

```

$makeblastdb -in ./blast_db/hydra_hybrid_protein.fasta -dbtype prot -out
./blast_db/hydra_hybrid_protein
$makeblastdb -in ./blast_db/planaria_longest_orfs_mod.pep -dbtype prot -out
./blast_db/planaria_longest_orfs_mod
$makeblastdb -in ./blast_db/XL9_1_v20161019_primaryTranscripts_pep.fa -dbtype
prot -out ./blast_db/XL9_1_v20161019_primaryTranscripts_pep
#./reverse_blast.sh
$blastp -num_threads 12 -query ./blast_db/hydra_hybrid_protein.fasta -db
./blast_db/planaria_longest_orfs_mod -out ./RBH/hydra_vs_planaria -evaluate 0.01 -
outfmt 7 -max_target_seqs 1
$blastp -num_threads 12 -query ./blast_db/planaria_longest_orfs_mod.pep -db
./blast_db/hydra_hybrid_protein -out ./RBH/planaria_vs_hydra -evaluate 0.01 -outfmt 7
-max_target_seqs 1
$blastp -num_threads 12 -query ./blast_db/hydra_hybrid_protein.fasta -db
./blast_db/XL9_1_v20161019_primaryTranscripts_pep -out
./RBH/hydra_vs_xenopus -evaluate 0.01 -outfmt 7 -max_target_seqs 1

```

```
$blastp -num_threads 12 -query
./blast_db/XL9_1_v20161019_primaryTranscripts_pep.fa -db
./blast_db/hydra_hybrid_protein -out ./RBH/xenopus_vs_hydra -evaluate 0.01 -outfmt
7 -max_target_seqs 1
```

```
$sawk '/^DENV|^XP/' ./RBH/hydra_vs_planaria|awk '{if($3>=30) print$0}'|awk
'{print$1,$2}'|sort -u > ./RBH/hydra_planaria_table
$sawk '/^tr5/' ./RBH/planaria_vs_hydra |awk '{if($3>=30) print$0}'|awk
'{print$1,$2}'|sort -u > ./RBH/planaria_hydra_table
$sawk '/^DENV|^XP/' ./RBH/hydra_vs_xenopus|awk '{if($3>=30) print$0}'|awk
'{print$1,$2}'|sort -u > ./RBH/hydra_xenopus_table
$sawk '/^gnl/' ./RBH/xenopus_vs_hydra|awk '{if($3>=30) print$0}'|awk
'{print$1,$2}'|sort -u > ./RBH/xenopus_hydra_table
$sawk 'NR==FNR{a[$1,$2];next} ($2,$1) in a' ./RBH/planaria_hydra_table
./RBH/hydra_planaria_table > ./RBH/hydra_planaria_rbh
$sawk 'NR==FNR{a[$1,$2];next} ($2,$1) in a' ./RBH/xenopus_hydra_table
./RBH/hydra_xenopus_table > ./RBH/hydra_xenopus_rbh
```

## 2) Protein IDs of genes upregulated upon knockdown of $\beta$ -catenin with their orthologs (based on RBH-reciprocal BLAST hits) in planaria

```
DENV_002883_XP_002166177.1 tr5_comp8157_c0_seq1_m_4534
DENV_003721 tr5_comp1472_c0_seq1_m_2764
DENV_008342_NP_001267778.1 tr5_comp2989_c0_seq1_m_10262
DENV_017300_XP_002166749.1 tr5_comp18327_c0_seq1_m_12529
DENV_031968_XP_012554474.1 tr5_comp11238_c0_seq1_m_12911
DENV_055772_XP_002157026.1 tr5_comp17606_c0_seq1_m_12097
DENV_057854 tr5_comp21026_c0_seq1_m_17528
DENV_066788_XP_002163988.1 tr5_comp2749_c0_seq1_m_8218
DENV_076867_XP_012560246.1 tr5_comp316_c0_seq1_m_8874
DENV_097762_XP_012565729.1 tr5_comp24701_c0_seq1_m_17136
DENV_097978_XP_012563379.1 tr5_comp7445_c0_seq1_m_1572
DENV_098962_XP_004208490.1 tr5_comp3340_c0_seq1_m_5018
DENV_127367_XP_002163146.3 tr5_comp7567_c0_seq1_m_4070
DENV_134105 tr5_comp150_c0_seq1_m_450
DENV_163354_XP_012555860.1 tr5_comp2868_c0_seq1_m_10311
XP_002166590.1_DENV_075186 tr5_comp19681_c0_seq1_m_12643
XP_002168605.3_DENV_067560 tr5_comp7514_c0_seq1_m_4569
XP_004208605.2_DENV_021903 tr5_comp39772_c0_seq1_m_18769
XP_012553532.1_DENV_100559 tr5_comp4330_c0_seq1_m_551
XP_012554603.1_DENV_178355 tr5_comp6149_c0_seq1_m_7319
XP_012555020.1_DENV_049455 tr5_comp1616_c0_seq1_m_8832
XP_012555758.1_DENV_013271 tr5_comp20054_c0_seq1_m_17081
XP_012555832.1_DENV_170349 tr5_comp7416_c0_seq1_m_6801
XP_012556963.1_DENV_068869 tr5_comp11764_c0_seq1_m_12451
XP_012558898.1 tr5_comp5422_c0_seq1_m_2396
XP_012559357.1_DENV_023644 tr5_comp14634_c0_seq1_m_14972
XP_012561605.1_DENV_008711 tr5_comp3700_c0_seq1_m_5956
XP_012564494.1_DENV_176993 tr5_comp4647_c0_seq1_m_5548
XP_012565081.1 tr5_comp803_c0_seq1_m_10400
XP_012565777.1 tr5_comp16411_c0_seq1_m_10830
XP_012566719.1_DENV_174502 tr5_comp8109_c0_seq1_m_47
```

## 3) Protein IDs of genes downregulated upon knockdown of $\beta$ -catenin with their orthologs (based on RBH-reciprocal BLAST hits) in planaria

```
DENV_012348_XP_012553992.1 tr5_comp5362_c0_seq1_m_7568
DENV_029380_XP_012555637.1 tr5_comp13078_c0_seq1_m_14058
```

DENV\_051689 tr5\_comp4080\_c0\_seq1\_m\_396  
DENV\_056127\_XP\_004207355.2 tr5\_comp12334\_c0\_seq1\_m\_13170  
DENV\_056573\_XP\_012566931.1 tr5\_comp14231\_c0\_seq1\_m\_14133  
DENV\_060128\_XP\_012553600.1 tr5\_comp9437\_c0\_seq1\_m\_8970  
DENV\_073439 tr5\_comp12477\_c0\_seq1\_m\_13438  
DENV\_078983\_XP\_004206814.1 tr5\_comp3625\_c0\_seq1\_m\_4072  
DENV\_085512\_XP\_002159764.2 tr5\_comp13566\_c0\_seq1\_m\_10678  
DENV\_089748\_NP\_001267780.1 tr5\_comp2508\_c0\_seq1\_m\_7772  
DENV\_091231\_XP\_004206634.1 tr5\_comp8204\_c0\_seq1\_m\_4187  
DENV\_102767\_XP\_012555741.1 tr5\_comp9535\_c0\_seq1\_m\_8607  
DENV\_103840\_XP\_012555807.1 tr5\_comp19981\_c0\_seq1\_m\_18049  
DENV\_110060\_XP\_002163599.1 tr5\_comp27318\_c0\_seq1\_m\_17771  
DENV\_139448\_XP\_002160774.1 tr5\_comp4102\_c0\_seq1\_m\_1317  
DENV\_144578 tr5\_comp7938\_c0\_seq1\_m\_8690  
DENV\_164073\_XP\_002162811.3 tr5\_comp20320\_c0\_seq1\_m\_18500  
DENV\_173944\_XP\_002155943.3 tr5\_comp6293\_c0\_seq1\_m\_6003  
DENV\_191448\_XP\_002164795.3 tr5\_comp125\_c0\_seq1\_m\_10183  
DENV\_198081\_XP\_002155049.1 tr5\_comp4681\_c0\_seq1\_m\_7022  
DENV\_198433 tr5\_comp637\_c0\_seq1\_m\_5451  
XP\_002153848.3\_DENV\_045673 tr5\_comp24446\_c0\_seq1\_m\_17218  
XP\_002159974.1\_DENV\_049843 tr5\_comp6898\_c0\_seq1\_m\_10014  
XP\_002163296.3\_DENV\_106178 tr5\_comp11071\_c0\_seq1\_m\_10577  
XP\_002163691.2\_DENV\_170250 tr5\_comp36486\_c0\_seq1\_m\_19493  
XP\_002164046.1 tr5\_comp1487\_c0\_seq1\_m\_9540  
XP\_002165472.2 tr5\_comp4801\_c0\_seq1\_m\_3100  
XP\_002165493.1\_DENV\_051715 tr5\_comp10336\_c0\_seq1\_m\_13562  
XP\_002166171.3\_DENV\_197934 tr5\_comp11025\_c0\_seq1\_m\_15317  
XP\_002168125.2\_DENV\_176500 tr5\_comp5964\_c0\_seq1\_m\_8909  
XP\_004208612.2\_DENV\_171524 tr5\_comp9177\_c0\_seq1\_m\_10244  
XP\_012554604.1\_DENV\_101910 tr5\_comp32538\_c0\_seq1\_m\_19111  
XP\_012555618.1\_DENV\_004709 tr5\_comp14941\_c0\_seq1\_m\_14112  
XP\_012556297.1\_DENV\_058222 tr5\_comp3789\_c0\_seq1\_m\_2565  
XP\_012556498.1\_DENV\_200779 tr5\_comp4929\_c0\_seq1\_m\_8401  
XP\_012558698.1\_DENV\_051053 tr5\_comp347\_c0\_seq1\_m\_457  
XP\_012559634.1\_DENV\_168885 tr5\_comp3801\_c0\_seq1\_m\_2460  
XP\_012561026.1\_DENV\_084438 tr5\_comp1908\_c0\_seq1\_m\_9940  
XP\_012561260.1 tr5\_comp2726\_c0\_seq1\_m\_2598  
XP\_012561295.1\_DENV\_008382 tr5\_comp9858\_c0\_seq1\_m\_11192  
XP\_012562708.1\_DENV\_062145 tr5\_comp9081\_c0\_seq1\_m\_2737  
XP\_012566382.1\_DENV\_178167 tr5\_comp14597\_c0\_seq1\_m\_11204

#### 4) Protein IDs of genes upregulated upon knockdown of $\beta$ -catenin with their orthologs (based on RBH-reciprocal BLAST hits) in *Xenopus*

DENV\_002883\_XP\_002166177.1 Xelaev18033356m  
DENV\_008342\_NP\_001267778.1 Xelaev18011464m  
DENV\_008531 Xelaev18026968m  
DENV\_009915\_XP\_012556947.1 Xelaev18033977m  
DENV\_010691\_XP\_012557009.1 Xelaev18041017m  
DENV\_017300\_XP\_002166749.1 Xelaev18000174m  
DENV\_022783\_XP\_012557245.1 Xelaev18036422m  
DENV\_023080\_XP\_002164291.1 Xelaev18025040m  
DENV\_029253\_NP\_001274286.1 Xelaev18027357m  
DENV\_031402\_XP\_002165888.1 Xelaev18046281m  
DENV\_031968\_XP\_012554474.1 Xelaev18018810m  
DENV\_055772\_XP\_002157026.1 Xelaev18039153m  
DENV\_057854 Xelaev18002488m  
DENV\_066788\_XP\_002163988.1 Xelaev18030893m  
DENV\_067234\_XP\_012566767.1 Xelaev18011720m  
DENV\_070660\_XP\_002157611.3 Xelaev18022709m  
DENV\_097762\_XP\_012565729.1 Xelaev18017244m  
DENV\_097978\_XP\_012563379.1 Xelaev18037770m

|                            |                 |
|----------------------------|-----------------|
| DENV_098962_XP_004208490.1 | Xelaev18043355m |
| DENV_127367_XP_002163146.3 | Xelaev18011004m |
| DENV_146956                | Xelaev18028129m |
| DENV_148889_XP_002164528.2 | Xelaev18026705m |
| DENV_157487                | Xelaev18038520m |
| DENV_163354_XP_012555860.1 | Xelaev18024895m |
| DENV_188436_XP_002154928.1 | Xelaev18035982m |
| XP_002154008.1             | Xelaev18037744m |
| XP_002163087.2_DENV_169466 | Xelaev18026971m |
| XP_002166590.1_DENV_075186 | Xelaev18033038m |
| XP_002168605.3_DENV_067560 | Xelaev18013914m |
| XP_004208605.2_DENV_021903 | Xelaev18026576m |
| XP_004211659.2_DENV_037292 | Xelaev18018977m |
| XP_012553451.1             | Xelaev18029006m |
| XP_012553532.1_DENV_100559 | Xelaev18044849m |
| XP_012554388.1_DENV_061537 | Xelaev18006883m |
| XP_012555020.1_DENV_049455 | Xelaev18021210m |
| XP_012555758.1_DENV_013271 | Xelaev18021235m |
| XP_012556963.1_DENV_068869 | Xelaev18026122m |
| XP_012557068.1             | Xelaev18003904m |
| XP_012557269.1             | Xelaev18003719m |
| XP_012558523.1_DENV_090796 | Xelaev18009322m |
| XP_012559357.1_DENV_023644 | Xelaev18023669m |
| XP_012560419.1_DENV_152770 | Xelaev18014156m |
| XP_012561605.1_DENV_008711 | Xelaev18045680m |
| XP_012563378.1_DENV_206654 | Xelaev18003717m |
| XP_012564439.1_DENV_006543 | Xelaev18037126m |
| XP_012564494.1_DENV_176993 | Xelaev18015103m |
| XP_012566923.1_DENV_170123 | Xelaev18012891m |

**5) Protein IDs of genes downregulated upon knockdown of  $\beta$ -catenin with their orthologs (based on RBH-reciprocal BLAST hits) in Xenopus**

|                            |                 |
|----------------------------|-----------------|
| DENV_008833_XP_012554670.1 | Xelaev18026018m |
| DENV_012348_XP_012553992.1 | Xelaev18020051m |
| DENV_022146_XP_002165751.1 | Xelaev18034616m |
| DENV_027001_XP_002158990.1 | Xelaev18018204m |
| DENV_046948                | Xelaev18033688m |
| DENV_048507_XP_012562827.1 | Xelaev18012794m |
| DENV_056127_XP_004207355.2 | Xelaev18020972m |
| DENV_056573_XP_012566931.1 | Xelaev18013013m |
| DENV_060128_XP_012553600.1 | Xelaev18022960m |
| DENV_069649                | Xelaev18012288m |
| DENV_076720_XP_002158844.1 | Xelaev18020482m |
| DENV_078983_XP_004206814.1 | Xelaev18005453m |
| DENV_085512_XP_002159764.2 | Xelaev18034293m |
| DENV_089748_NP_001267780.1 | Xelaev18031149m |
| DENV_093426_XP_004210083.1 | Xelaev18043203m |
| DENV_098364_XP_012555674.1 | Xelaev18039397m |
| DENV_101803_XP_012565167.1 | Xelaev18045463m |
| DENV_102767_XP_012555741.1 | Xelaev18040863m |
| DENV_109387_XP_012562538.1 | Xelaev18011397m |
| DENV_113734_XP_012556903.1 | Xelaev18006583m |
| DENV_118389_NP_001274292.1 | Xelaev18043371m |
| DENV_128081_XP_012559396.1 | Xelaev18005839m |
| DENV_129246_XP_012560559.1 | Xelaev18011685m |
| DENV_135075_XP_002164912.3 | Xelaev18029079m |
| DENV_139448_XP_002160774.1 | Xelaev18002478m |
| DENV_141689_XP_002158070.2 | Xelaev18030633m |
| DENV_164073_XP_002162811.3 | Xelaev18028982m |

|                                |                  |
|--------------------------------|------------------|
| DENV_173944_XP_002155943.3     | Xelaev18045581m  |
| DENV_179050_XP_012555495.1     | Xelaev18022865m  |
| DENV_183673_XP_002154419.2     | Xelaev18005899m  |
| DENV_184349_XP_002157228.2     | Xelaev18009169m  |
| DENV_191448_XP_002164795.3     | Xelaev18011935m  |
| DENV_192159_XP_012558303.1     | Xelaev18040932m  |
| DENV_198081_XP_002155049.1     | Xelaev18029658m  |
| DENV_198433_Xelaev18026677m    |                  |
| DENV_203339_XP_012561918.1     | Xelaev18041536m  |
| XP_002153848.3_DENV_045673     | Xelaev18032986m  |
| XP_002156487.1_DENV_099471     | Xelaev18032949m  |
| XP_002159974.1_DENV_049843     | Xelaev18019997m  |
| XP_002162975.1_DENV_038595     | Xelaev18015825m  |
| XP_002165472.2_Xelaev18029500m |                  |
| XP_002165493.1_DENV_051715     | Xelaev18016633m  |
| XP_002166171.3_DENV_197934     | Xelaev18031534m  |
| XP_002167951.2_DENV_065194     | Xelaev18025043m  |
| XP_002168125.2_DENV_176500     | Xelaev18017736m  |
| XP_004208612.2_DENV_171524     | Xelaev18025326m  |
| XP_004211105.1_DENV_034494     | Xelaev18017003m  |
| XP_012553964.1_Xelaev18025341m |                  |
| XP_012554405.1_DENV_105277     | Xelaev18021564m  |
| XP_012554629.1_DENV_039347     | Xelaev18021990m  |
| XP_012554760.1_Xelaev18013127m |                  |
| XP_012556498.1_DENV_200779     | Xelaev18025960m  |
| XP_012557119.1_DENV_141373     | Xelaev18038940m  |
| XP_012558698.1_DENV_051053     | Xelaev18032838m  |
| XP_012559409.1_DENV_179707     | Xelaev18041001m  |
| XP_012559634.1_DENV_168885     | Xelaev18027250m  |
| XP_012560374.1_DENV_179864     | Xelaev18005545m  |
| XP_012561260.1_Xelaev18031383m |                  |
| XP_012561295.1_DENV_008382     | Xelaev18031124m  |
| XP_012562678.1_DENV_130362     | Xelaev18013693m  |
| XP_012562708.1_DENV_062145     | Xelaev18022141m  |
| XP_012564205.1_DENV_168699     | Xelaev18034771m  |
| XP_012566382.1_DENV_178167     | Xelaev18038200ma |

## Melt curve plots for ChIP qRT-PCR

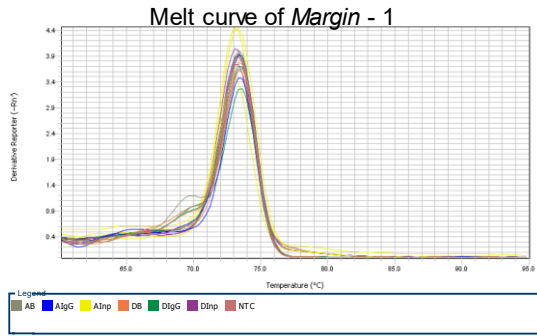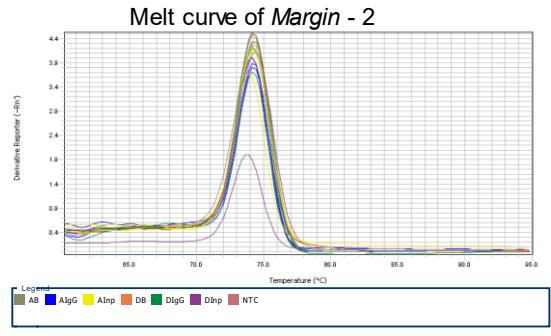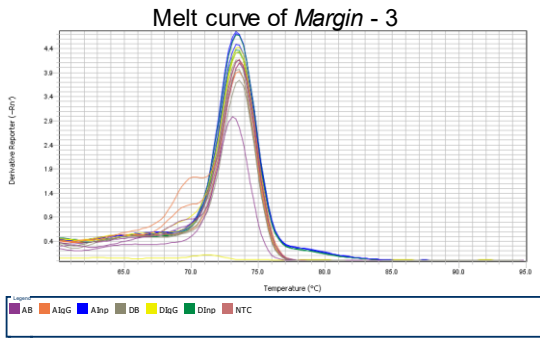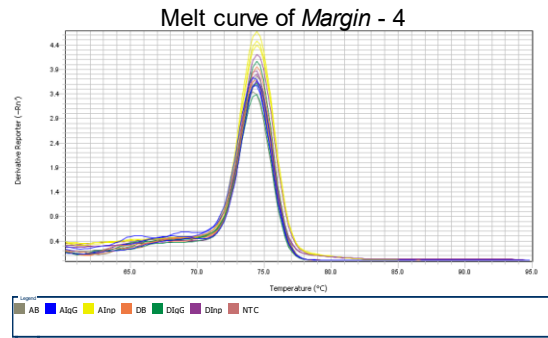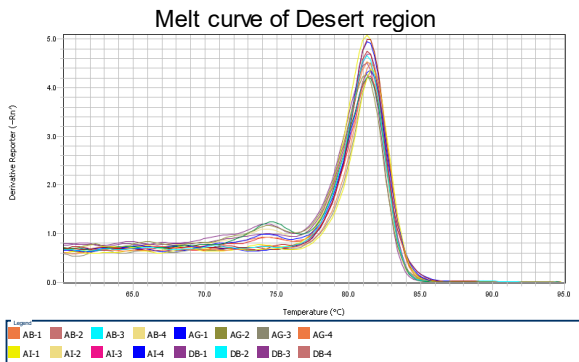

## TCF7L2 binding motifs on promoter regions of *HvOtp1*, *HvOtx1* and *Gorget*

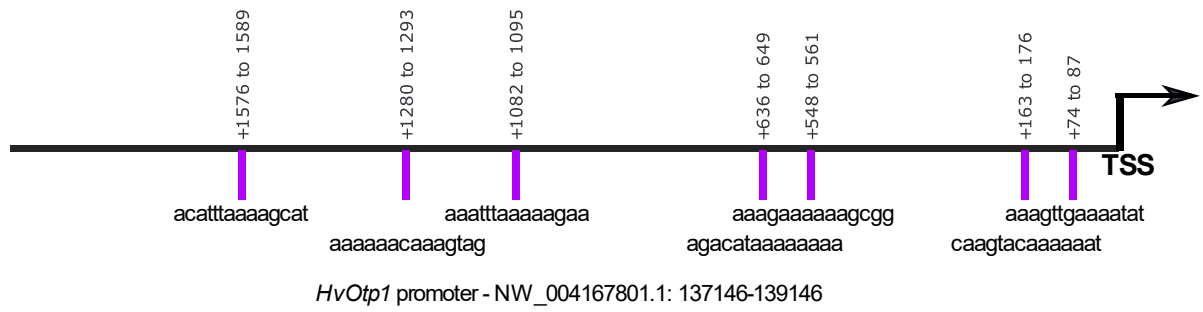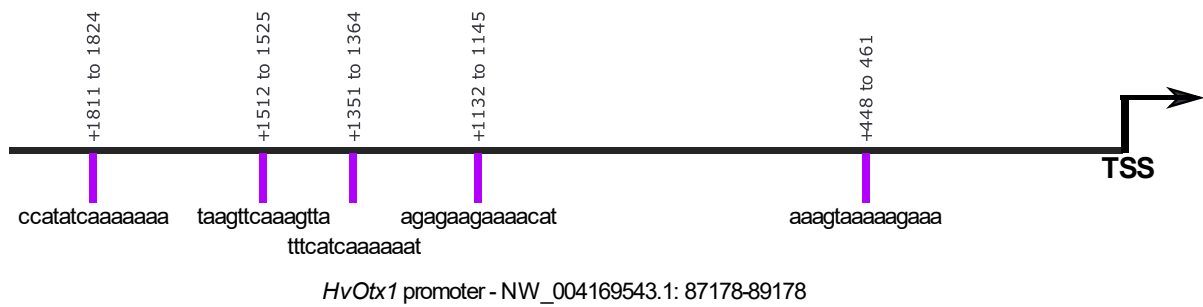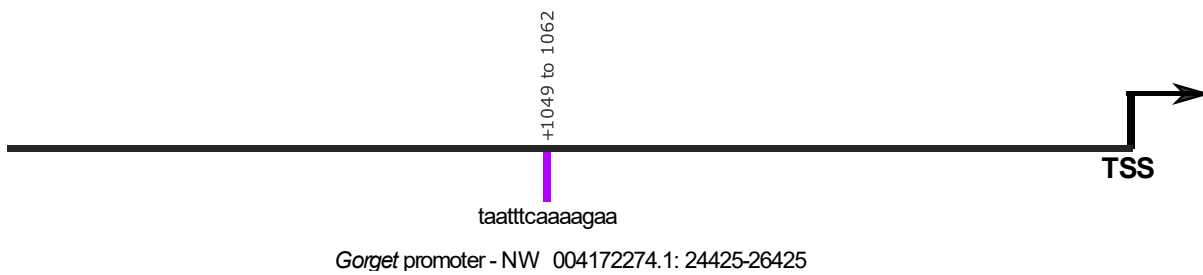



## References

- 1 Siebert, S. *et al.* Stem cell differentiation trajectories in Hydra resolved at single-cell resolution. *Science* **365**, doi:10.1126/science.aav9314 (2019).
- 2 Wenger, Y., Buzgariu, W., Perruchoud, C., Loichot, G. & Galliot, B. Generic and context-dependent gene modulations during Hydra whole body regeneration. *bioRxiv*, 587147, doi:10.1101/587147 (2019).
- 3 Vogg, M. C. *et al.* An evolutionarily-conserved Wnt3/beta-catenin/Sp5 feedback loop restricts head organizer activity in Hydra. *Nat Commun* **10**, 312, doi:10.1038/s41467-018-08242-2 (2019).
- 4 Zhong, Y. F. & Holland, P. W. HomeoDB2: functional expansion of a comparative homeobox gene database for evolutionary developmental biology. *Evol Dev* **13**, 567-568, doi:10.1111/j.1525-142X.2011.00513.x (2011).
- 5 Ryan, J. F. *et al.* The cnidarian-bilaterian ancestor possessed at least 56 homeoboxes: evidence from the starlet sea anemone, *Nematostella vectensis*. *Genome Biol* **7**, R64, doi:10.1186/gb-2006-7-7-R64 (2006).
- 6 Zimmermann, L. *et al.* A Completely Reimplemented MPI Bioinformatics Toolkit with a New HHpred Server at its Core. *J Mol Biol* **430**, 2237-2243, doi:10.1016/j.jmb.2017.12.007 (2018).
- 7 Huerta-Cepas, J. *et al.* eggNOG 4.5: a hierarchical orthology framework with improved functional annotations for eukaryotic, prokaryotic and viral sequences. *Nucleic Acids Res* **44**, D286-293, doi:10.1093/nar/gkv1248 (2016).
- 8 Miller, M. A., Pfeiffer, W. & Schwartz, T. in *2010 Gateway Computing Environments Workshop (GCE)*. 1-8.
- 9 Letunic, I. & Bork, P. Interactive tree of life (iTOL) v3: an online tool for the display and annotation of phylogenetic and other trees. *Nucleic Acids Res* **44**, W242-245, doi:10.1093/nar/gkw290 (2016).
